# Supplementary material for: Crystal engineering of nutraceutical phytosterols: new cocrystal solid solutions
Source: Royal Society of Chemistry journal article supplement (doi:10.1039/d0ce00704h), 2020-01-01
Supplement: d0ce00704h1.pdf [file d0ce00704h1.pdf]

# Crystal Engineering of Nutraceutical Phytosterols: New Cocrystal Solid-Solution

Rafael Barbas,<sup>a</sup> Lúdia Bofill,<sup>b</sup> Dafne de Sande,<sup>a</sup> Mercè Font-Bardia,<sup>c</sup> and Rafel Prohens<sup>\*a</sup>

a Unitat de Polimorfisme i Calorimetria, Centres Científics i Tecnològics, Universitat de Barcelona, Baldiri Reixac 10, 08028 Barcelona, Spain

b Center for Intelligent Research in Crystal Engineering S.L. Spain

c Unitat de Difracció de Raigs X, Centres Científics i Tecnològics, Universitat de Barcelona

## Electronic Supplementary Information

### Table of contents:

|                                                                             |    |
|-----------------------------------------------------------------------------|----|
| 1. Experimental.....                                                        | 2  |
| 2. Crystal data and structure refinement.....                               | 6  |
| 3. Synthesis of the different crystal forms.....                            | 18 |
| 4. Analytical methodologies: determination of phytosterols content (%)...20 |    |
| 5. Characterization of the solids.....                                      | 26 |
| 6. References.....                                                          | 63 |

# 1. Experimental: materials and methods

## 1.1 Materials

$\beta$ -sitosterol (SIT CSS) used in this study was used as received from Sigma-Aldrich with purity of 79.3% (batch BCBS0067V). According to its certificate of origin it was purified/extracted from non-biological natural inorganic/organic source.

Standard sample of  $\beta$ -sitosterol from Ph. Eu. Reference Standard, ref. (Y0001615) (72.5%) has been used to HPLC phytosterols determination and it was purchased from Sigma-Aldrich.

The following coformers have been used and an additional two coformers have been considered after the qualitative solubility experimental results (acetic acid and formic acid): acetic acid, formic acid, propionic acid, malic acid, succinic acid, fumaric acid, citric acid, lactic acid, pyruvic acid (zymonic acid), glutamic acid, glutamine, 3-hydroxybenzoic acid, 4-hydroxybenzoic acid, 2,4-dihydroxybenzoic acid, 3,4-dihydroxybenzoic acid, 2,5-dihydroxybenzoic acid, 2,4-dihydroxybenzoic acid, 3,5-dihydroxybenzoic acid, gallic acid, 2-picolinic acid, nicotinic acid, L-ascorbic acid, orcinol, resorcinol, hydroquinone and phloroglucinol.

The coformers were purchased from Sigma-Aldrich except propionic acid, which was purchased from Reidel-de Haën.

## 1.2. Solubility qualitative determination of $\beta$ -sitosterol solid solution (SIT CSS)

The solvents selected to be used in the cocrystal screening are highlighted in black.

SIT CSS was dissolved in 30 solvents in a temperature range of 25-90 °C. SIT CSS is soluble at 25 °C in the following solvents: **IPA** (0.6 mL), **butanol** (0.2 mL), **MEK** (0.4 mL), **acetone** (1.6 mL), MiBK (0.4 mL), **cyclohexane** (1.0 mL), **toluene** (0.3 mL), xylene (0.4 mL), **AcOEt** (0.4 mL), diethyl ether (0.3 mL), **THF** (0.2 mL), dimethyl ethylene glycol (0.3 mL), **diisopropyl ether** (0.2 mL), **dioxane** (0.2 mL), **dichloromethane** (0.2 mL), chloroform (0.2 mL), **acetic acid** (1.3 mL), **benzyl alcohol** (0.4 mL) and diethylamine (0.2 mL). At 50 °C it is soluble in **ethanol** (2.0 mL) and heptane. At 70 °C it is partially soluble in **methanol** (2.0 mL). At 80 °C it is soluble in **ACN** (2.0 mL). At 90 °C it is soluble in DMSO (2.0 mL) and partially soluble in DMF (2.0 mL). It is insoluble in **ethylene glycol**, **formic acid**, water, pentane and  $\text{NH}_3$  (32%) in water.

## 1.3 Solid forms Screening

Screening through net grinding (with liquid coformers) and liquid assisted grinding experiments (LAG) was conducted by grinding. Thus, 20-35 mg of a 1:1 mixture of SIT CSS and each coformer together with one drop (volume estimated 25  $\mu\text{L}$ ) of each solvent were grinded using a Retsch MM 2000 grinding mill. The samples were placed in 2 mL volume stainless steel jars, along with two stainless tungsten grinding balls of 3 mm diameter. Grinding was performed for 15-30 minutes, with a frequency of the mill of 30 Hz. Finally, the samples were collected immediately without prior drying for PXRD analysis. The formation of a new solid form was determined by comparing PXRD patterns of starting materials (any known crystal form of both SIT and the respective coformer) and products from cocrystal screening LAG experiments. When evidences of new forms were detected reaction crystallization (RC) experiments were conducted in order to

prepare bigger amounts of material for further characterization by preparing a saturated solution of the most soluble component (SIT CSS or coformer) in a particular solvent in a sealed vial under stirring. A small quantity of the less soluble component was added until it did not dissolve anymore. The suspension was stirred at different times and the resulting solids were filtered and analyzed by PXRD. Screening through solvent mediated transformations (SMT) were conducted by preparing suspensions of SIT and coformer in different molar ratios (40-1200 mg of the final mixture) in selected solvents. The sealed vials were stirred for different times and the resulting solids were filtered and analyzed by PXRD. A summary of the experimental procedures can be found in Table S1.

**Table S1. Cocrystal screening of  $\beta$ -Sitosterol CSS**

| Methodology                                      | Coformers | N° Experiments | N° Solids | Positive results <sup>a</sup> | Coformers | Form obtained (according to PXRD)                                                                                                                                                        |
|--------------------------------------------------|-----------|----------------|-----------|-------------------------------|-----------|------------------------------------------------------------------------------------------------------------------------------------------------------------------------------------------|
| Solubility Study                                 | -         | 34             | 29        | 2                             | -         | Anhydrous form (LOFFET), monohydrate (TEXQOC) and three solvates: IPA, DMF DMSO, acetic acid and benzyl alcohol (CSS SIT-BzOH-H <sub>2</sub> O)                                          |
| Net grinding at 25 °C                            | 5         | 5              | 5         | 1 / 2                         | 3 / 2     | CSS SIT-ProA-H <sub>2</sub> O (I and II) and CSS SIT-ZA-H <sub>2</sub> O                                                                                                                 |
| Liquid assisted grinding at 25 °C                | 22        | 84             | 80        | 1                             | 15        | 15 new evidences                                                                                                                                                                         |
| Reaction Crystallization at 25 °C                | 3         | 84             | 81        | 1 / 2                         | 11 / 2    | CSS SIT-GA and CSS SIT-3,4-DHBA-H <sub>2</sub> O                                                                                                                                         |
| Solvent mediated transformation at 25 °C         | 2         | 63             | 32        | 1/2                           | 5/4       | CSS SIT-ProA-H <sub>2</sub> O II, CSS SIT-ZA-H <sub>2</sub> O and CSS SIT-4-HBA (I and II)                                                                                               |
| Crystallizations at slow cooling rate            | 5         | 50             | 44        | 3                             | 2         | Hemihydrate (JOPMUP01), CSS SIT-BzOH-H <sub>2</sub> O, CSS SIT-ProA-H <sub>2</sub> O (I and II), CSS SIT-GA and CSS SIT-ZA-H <sub>2</sub> O                                              |
| Solvent atmosphere                               | 1         | 1              | 1         | 2                             | 1         | CSS SIT-ProA-ACN                                                                                                                                                                         |
| Preparation of the solid forms: scale up batches | 5         | 100            | 98        | 2                             | 5         | CSS SIT-BzOH-H <sub>2</sub> O<br>CSS SIT-ProA-H <sub>2</sub> O (I and II),<br>CSS SIT-ZA-H <sub>2</sub> O<br>CSS SIT-GA<br>CSS SIT-4-HBA (I and II)<br>CSS SIT-3,4-DHBA-H <sub>2</sub> O |

<sup>a</sup> (1) positive: SIT + coformer + new peaks observed in PXRD, (2) positive: cocrystal, (3) single crystal

#### 1.4 Single X-ray crystallographic analysis

Single crystal X-ray diffraction (SCXRD) intensity data of the different crystal forms of  $\beta$ -sitosterol were collected using a D8 Venture system equipped with a multilayer monochromator and a Mo microfocus ( $\lambda = 0.71073 \text{ \AA}$ ). Frames were integrated with the Bruker SAINT software package using a SAINT algorithm. Data were corrected for absorption effects using the multi-scan method (SADABS).<sup>1</sup> The structure was solved and refined using the Bruker SHELXTL Software Package, a computer program for automatic solution of crystal structures and refined by full-matrix least-squares method with ShelXle Version 4.8.0, a Qt graphical user interface for SHELXL computer program.<sup>2</sup>

#### 1.5 Powder X-ray Diffraction Analysis

Powder X-ray diffraction (PXRD) patterns were obtained on a PANalytical X'Pert PRO MPD diffractometer in transmission configuration using Cu K $\alpha$ 1+2 radiation ( $\lambda = 1.5406 \text{ \AA}$ ) with a focusing elliptic mirror and a PIXcel detector working at a maximum detector's active length of  $3.347^\circ$ . Configuration of convergent beam with a focalizing mirror and a transmission geometry with flat sample sandwiched between low absorbing films measuring from  $2$  to  $40^\circ$  in  $2\theta$ , with a step size of  $0.026^\circ$  and a total measuring time of 30 minutes to 2 hours at room temperature (298 K).

#### 1.6 Differential Scanning Calorimetry (DSC)

Differential scanning calorimetry analysis were carried out by means of a Mettler-Toledo DSC-822e calorimeter. Experimental conditions: aluminium crucibles of  $40 \mu\text{L}$  volume, atmosphere of dry nitrogen with  $50 \text{ mL/min}$  flow rate, heating rate of  $10^\circ\text{C/min}$ . The calorimeter was calibrated with indium of 99.99% purity (mp:  $156.4^\circ\text{C}$ ;  $\Delta H$ :  $28.95 \text{ J/g}$ ).

#### 1.7 Thermogravimetric Analysis (TGA)

Thermogravimetric analyses were performed on a Mettler-Toledo TGA-851e thermobalance. Experimental conditions: alumina crucibles of  $70 \mu\text{L}$  volume, atmosphere of dry nitrogen with  $50 \text{ mL/min}$  flow rate, heating rate of  $10^\circ\text{C/min}$ .

#### 1.8 Nuclear Magnetic Resonance (NMR)

Proton nuclear magnetic resonance ( $^1\text{H}$ -NMR) spectra has been recorded on a Varian Mercury 400 (400 MHz). Chemical shifts for proton are reported in parts per million (ppm) downfield from tetramethylsilane and are referenced to residual proton in the NMR solvents (dmso- $d_6$ :  $\delta$  2.50; chloroform- $d$ :  $\delta$  7.26). Experimental conditions: delay: 1; pulse:  $45^\circ$ ; scans: 32.

## 2. Crystal data and structure refinement

### 2.1 Benzyl alcohol solvate hydrate (CSS SIT-BzOH-H<sub>2</sub>O) (4:1:1) (CCDC: 2000520)

| Structure                                        | CSS SIT-BzOH-H <sub>2</sub> O                    | Asymmetric Unit representation                                                       |
|--------------------------------------------------|--------------------------------------------------|--------------------------------------------------------------------------------------|
| Empirical formula                                | C <sub>123</sub> H <sub>210</sub> O <sub>6</sub> | 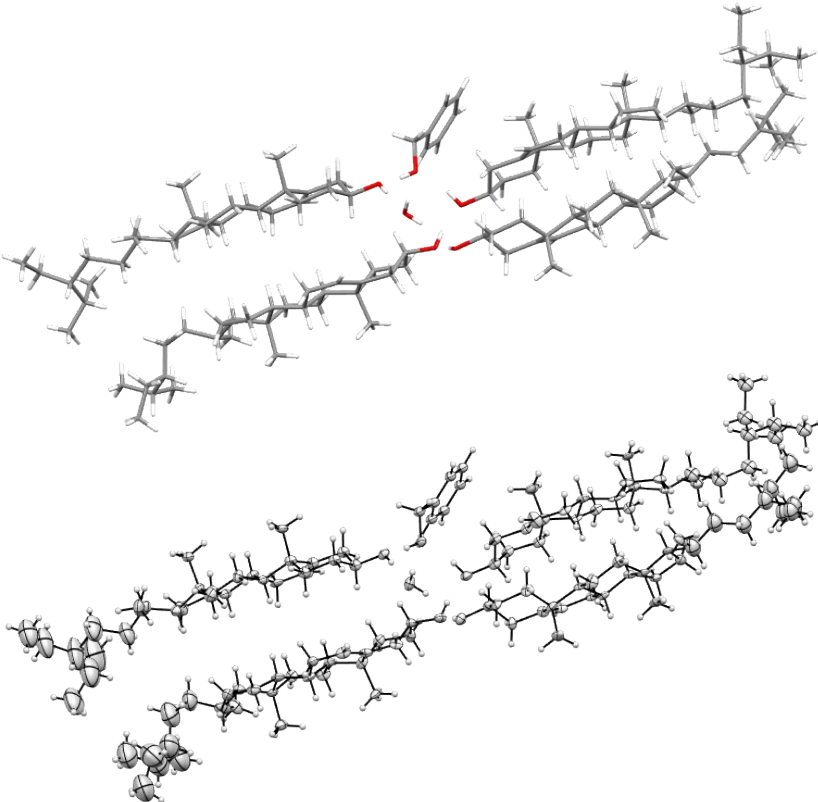 |
| Formula Weight                                   | 1784.90                                          |                                                                                      |
| Temperature (K)                                  | 100(2)                                           |                                                                                      |
| Wavelength (Å)                                   | 0.71073                                          |                                                                                      |
| Crystal system                                   | Triclinic                                        |                                                                                      |
| space group                                      | P 1                                              |                                                                                      |
| a, b, c (Å)                                      | 7.597(3), 9.730(4), 37.763(14)                   |                                                                                      |
| α, β, γ (°)                                      | 84.846(9), 86.089(8), 88.219(9)                  |                                                                                      |
| Volume (Å <sup>3</sup> )                         | 2772.8(19)                                       |                                                                                      |
| Z, Density (calc.) (Mg/m <sup>3</sup> )          | 1, 1.069                                         |                                                                                      |
| Absorption coefficient (mm <sup>-1</sup> )       | 0.063                                            |                                                                                      |
| F(000)                                           | 996                                              |                                                                                      |
| Crystal size (mm <sup>3</sup> )                  | 0.2 x 0.1 x 0.1                                  |                                                                                      |
| θ range for data collection (°)                  | 2.171 to 26.879                                  |                                                                                      |
| Limiting indices                                 | -9 ≤ h ≤ 9, -12 ≤ k ≤ 12, -46 ≤ l ≤ 46           |                                                                                      |
| Reflections collected / unique                   | 43250/ 20328 [R(int)= 0.0741]                    |                                                                                      |
| Completeness to theta = 25.242°                  | 98.4                                             |                                                                                      |
| Absorption correction                            | Semi-empirical from equivalents                  |                                                                                      |
| Max. and min. transmission                       | 0.7453 and 0.5118                                |                                                                                      |
| Refinement method                                | Full-matrix least-squares on F <sup>2</sup>      |                                                                                      |
| Data/restraints/parameters                       | 20328 / 34 / 992                                 |                                                                                      |
| Goodness-of - fit on F <sup>2</sup>              | 0.947                                            |                                                                                      |
| Final R indices [I > 2σ(I)]                      | R1 = 0.0461, wR2 = 0.0903                        |                                                                                      |
| R indices (all data)                             | R1 = 0.0729, wR2 = 0.0964                        |                                                                                      |
| Largest diff. peak and hole (e.Å <sup>-3</sup> ) | 0.613 and -0.548                                 |                                                                                      |

**Table S2. Hydrogen bonds for CSS SIT-BzOH-H<sub>2</sub>O [Å and °]**

| Donor --- H....Acceptor | [ARU]      | d(D– H) | d(H...A) | d(D...A) | <(D - H...A) |
|-------------------------|------------|---------|----------|----------|--------------|
| O1A ---H1AO ...O1C      | [     ]    | 0.84    | 1.86     | 2.700(3) | 175          |
| O1 ---H1O ...O1D        | [     ]    | 0.84    | 1.89     | 2.682(3) | 158          |
| O1B ---H1BO ...O1       | [     ]    | 0.84    | 1.85     | 2.670(3) | 165          |
| O1C ---H1CO ...O1B      | [     ]    | 0.84    | 1.96     | 2.774(3) | 162          |
| O1D ---H1DO ...O1W      | [     ]    | 0.84    | 1.85     | 2.678(3) | 166          |
| O1W ---H1WA ...O1A      | [     ]    | 0.85(3) | 2.07(3)  | 2.894(3) | 162(3)       |
| O1W ---H1WB ...O1B      | [ 1+x,y,z] | 0.83(3) | 2.07(3)  | 2.863(3) | 160(3)       |

## 2.2 Propionic acid cocrystal hydrate (CSS SIT-ProA-H<sub>2</sub>O I) (2:1:1) (CCDC: 2000521)

| Structure                                        | CSS SIT-ProA-H <sub>2</sub> O I                 | Asymmetric Unit representation                                                       |
|--------------------------------------------------|-------------------------------------------------|--------------------------------------------------------------------------------------|
| Empirical formula                                | C <sub>61</sub> H <sub>108</sub> O <sub>5</sub> | 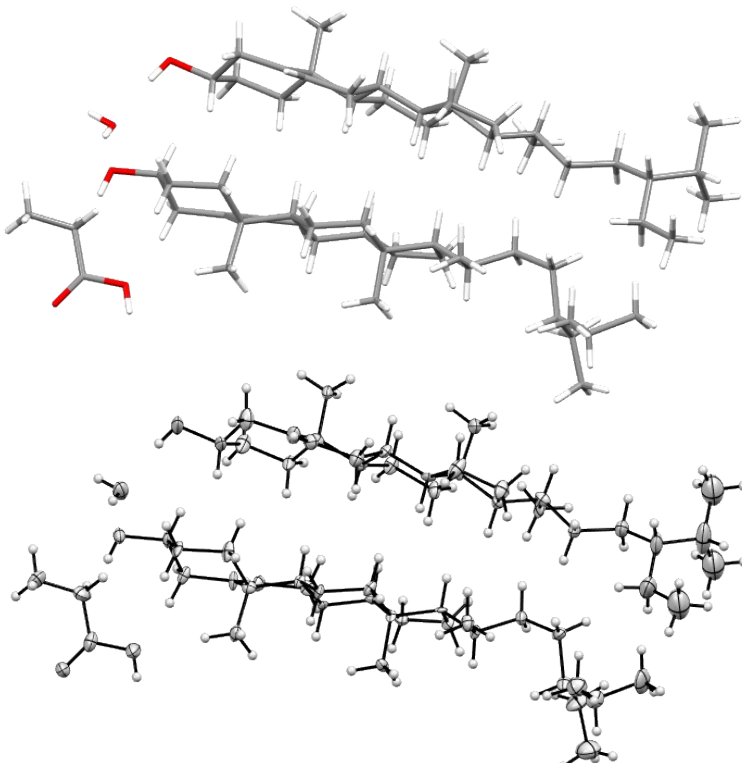 |
| Formula Weight                                   | 921.47                                          |                                                                                      |
| Temperature (K)                                  | 293(2)                                          |                                                                                      |
| Wavelength (Å)                                   | 0.71073                                         |                                                                                      |
| Crystal system                                   | Monoclinic                                      |                                                                                      |
| space group                                      | P 21                                            |                                                                                      |
| a, b, c (Å)                                      | 9.439(2), 7.5391(16), 39.635(8)                 |                                                                                      |
| α, β, γ (°)                                      | 90, 95.216(6), 90                               |                                                                                      |
| Volume (Å <sup>3</sup> )                         | 2808.8(10)                                      |                                                                                      |
| Z, Density (calc.) (Mg/m <sup>3</sup> )          | 2, 1.090                                        |                                                                                      |
| Absorption coefficient (mm <sup>-1</sup> )       | 0.066                                           |                                                                                      |
| F(000)                                           | 1028                                            |                                                                                      |
| Crystal size (mm <sup>3</sup> )                  | 0.353 x 0.071 x 0.032                           |                                                                                      |
| θ range for data collection (°)                  | 2.064 to 27.656                                 |                                                                                      |
| Limiting indices                                 | -11 ≤ h ≤ 11, -9 ≤ k ≤ 9, -49 ≤ l ≤ 49          |                                                                                      |
| Reflections collected / unique                   | 53621 / 12975 [R(int) = 0.4570]                 |                                                                                      |
| Completeness to theta = 25.242°                  | 99.9                                            |                                                                                      |
| Absorption correction                            | Semi-empirical from equivalents                 |                                                                                      |
| Max. and min. transmission                       | 0.7456 and 0.6443                               |                                                                                      |
| Refinement method                                | Full-matrix least-squares on F <sup>2</sup>     |                                                                                      |
| Data/restraints/parameters                       | 12975 / 9 / 599                                 |                                                                                      |
| Goodness-of-fit on F <sup>2</sup>                | 0.743                                           |                                                                                      |
| Final R indices [I > 2σ(I)]                      | R1 = 0.0446, wR2 = 0.0582                       |                                                                                      |
| R indices (all data)                             | R1 = 0.3086, wR2 = 0.0920                       |                                                                                      |
| Largest diff. peak and hole (e.Å <sup>-3</sup> ) | 0.339 and -0.328                                |                                                                                      |



**Table S3. Hydrogen bonds for CSS SIT-ProA-H<sub>2</sub>O I [Å and °]**

| Donor --- H....Acceptor | [ARU]          | d(D – H) | d(H...A) | d(D...A) | <(D - H...A) |
|-------------------------|----------------|----------|----------|----------|--------------|
| O1A---H1AA...O1W        | [1-x,1/2+y,-z] | 0.80(5)  | 1.94(5)  | 2.738(5) | 174(5)       |
| O1---H1O...O3W          | [ x,y,z]       | 0.82     | 1.85     | 2.653(6) | 164          |
| O3W---H3WD...O1A        | [x,-1+y,z]     | 0.82(4)  | 2.04(4)  | 2.805(6) | 156(5)       |
| O3W---H3WE...O1A        | [-x,-1/2+y,-z] | 0.84(4)  | 1.93(4)  | 2.750(6) | 166(4)       |
| O2W---H2O...O1          | [1+x,y,z]      | 0.82     | 1.81     | 2.630(5) | 172          |

## 2.3 Propionic acid cocrystal hydrate (CSS SIT-ProA-H<sub>2</sub>O II) (4:1:1) (CCDC: 2000523)

| Structure                                        | CSS SIT-ProA-H <sub>2</sub> O II                 | Asymmetric Unit representation                                                       |
|--------------------------------------------------|--------------------------------------------------|--------------------------------------------------------------------------------------|
| Empirical formula                                | C <sub>119</sub> H <sub>208</sub> O <sub>7</sub> | 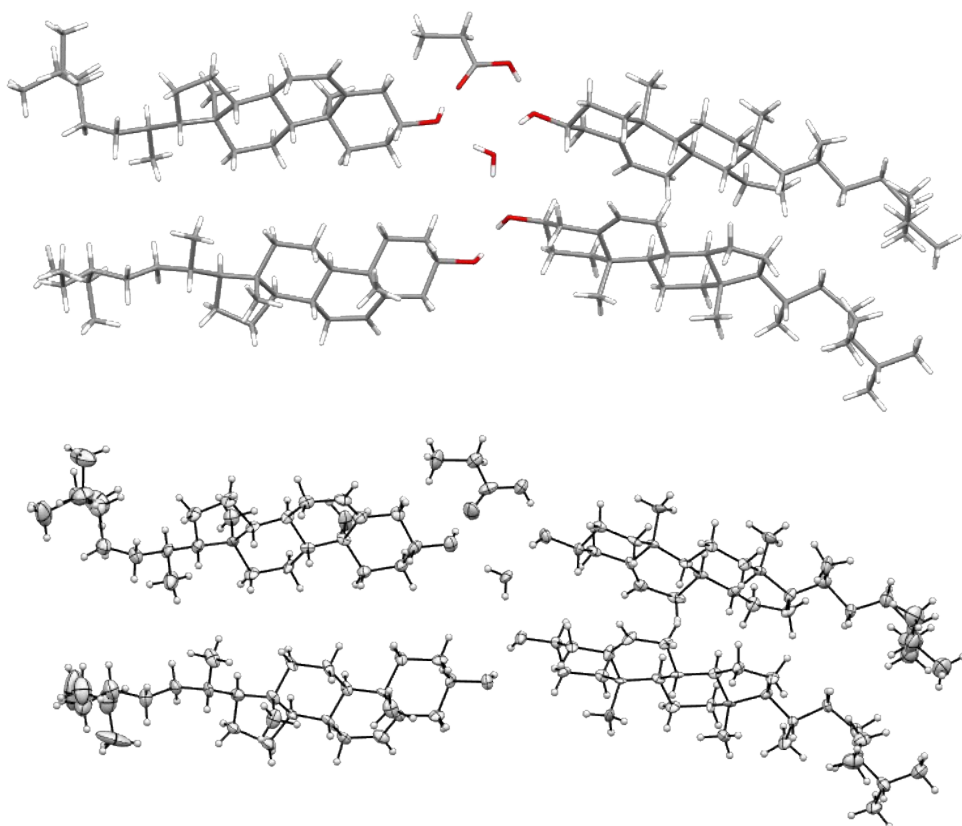 |
| Formula Weight                                   | 1750.84                                          |                                                                                      |
| Temperature (K)                                  | 100(2)                                           |                                                                                      |
| Wavelength (Å)                                   | 0.71073                                          |                                                                                      |
| Crystal system                                   | Monoclinic                                       |                                                                                      |
| space group                                      | P 21                                             |                                                                                      |
| a, b, c (Å)                                      | 26.373(3), 7.4971(7), 27.183(3)                  |                                                                                      |
| α, β, γ (°)                                      | 90, 92.569(6), 90                                |                                                                                      |
| Volume (Å <sup>3</sup> )                         | 5369.2(10)                                       |                                                                                      |
| Z, Density (calc.) (Mg/m <sup>3</sup> )          | 2, 1.083                                         |                                                                                      |
| Absorption coefficient (mm <sup>-1</sup> )       | 0.064                                            |                                                                                      |
| F(000)                                           | 1956                                             |                                                                                      |
| Crystal size (mm <sup>3</sup> )                  | 0.317 x 0.087 x 0.032                            |                                                                                      |
| θ range for data collection (°)                  | 2.202 to 26.431                                  |                                                                                      |
| Limiting indices                                 | -32 ≤ h ≤ 32, -9 ≤ k ≤ 9, -33 ≤ l ≤ 33           |                                                                                      |
| Reflections collected / unique                   | 84425 / 21902 [R(int) = 0.5074]                  |                                                                                      |
| Completeness to theta = 25.242°                  | 99.8                                             |                                                                                      |
| Absorption correction                            | Semi-empirical from equivalents                  |                                                                                      |
| Max. and min. transmission                       | 0.7454 and 0.6268                                |                                                                                      |
| Refinement method                                | Full-matrix least-squares on F <sup>2</sup>      |                                                                                      |
| Data/restraints/parameters                       | 21902 / 4 / 1166                                 |                                                                                      |
| Goodness-of-fit on F <sup>2</sup>                | 0.950                                            |                                                                                      |
| Final R indices [I > 2σ(I)]                      | R1 = 0.1012, wR2 = 0.1599                        |                                                                                      |
| R indices (all data)                             | R1 = 0.3448, wR2 = 0.2356                        |                                                                                      |
| Largest diff. peak and hole (e.Å <sup>-3</sup> ) | 0.394 and -0.327                                 |                                                                                      |

**Table S4. Hydrogen bonds for CSS SIT-ProA-H<sub>2</sub>O II [Å and °]**

| Donor --- H....Acceptor | [ARU]     | d(D – H) | d( H...A) | d(D...A)  | <(D - H...A) |
|-------------------------|-----------|----------|-----------|-----------|--------------|
| O1A---H1AO...O3W        | [x,y,z]   | 0.84     | 1.97      | 2.793(10) | 165          |
| O1C---H1C...O3W         | [x,1+y,z] | 0.84     | 2.26      | 2.870(10) | 129          |
| O1W---H1W...O1A         | [x,y,z]   | 0.84     | 2.37      | 2.665(10) | 101          |
| O1B---H1BO...O1C        | [x,y,z]   | 0.84     | 1.93      | 2.741(9)  | 162          |
| O1D---H1DO...O2W        | [x,y,z]   | 0.84     | 1.86      | 2.693(11) | 170          |
| O3W---H3OA...O1B        | [x,y,z]   | 0.80(7)  | 2.09(6)   | 2.806(9)  | 149(8)       |
| O3W---H3OB...O1D        | [x,y,z]   | 0.81(5)  | 1.91(5)   | 2.691(8)  | 162(7)       |

## 2.4 Propionic acid cocrystal ACN solvate (CSS SIT-ProA-ACN) (4:1:1) (CCDC: 2000525)

| Structure                                        | CSS SIT-ProA-ACN                                  | Asymmetric Unit representation                                                       |
|--------------------------------------------------|---------------------------------------------------|--------------------------------------------------------------------------------------|
| Empirical formula                                | C <sub>121</sub> H <sub>209</sub> NO <sub>6</sub> | 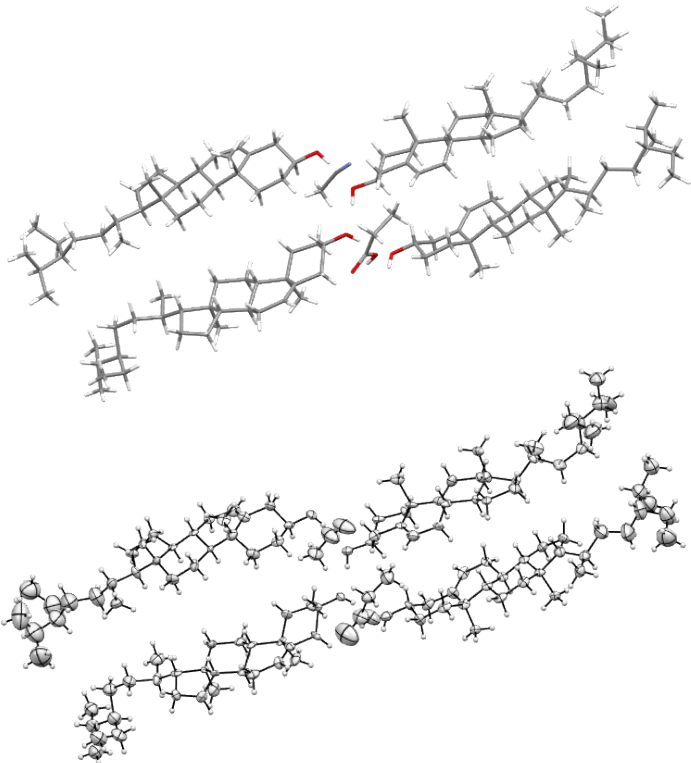 |
| Formula Weight                                   | 1773.88                                           |                                                                                      |
| Temperature (K)                                  | 100(2)                                            |                                                                                      |
| Wavelength (Å)                                   | 0.71073                                           |                                                                                      |
| Crystal system                                   | Triclinic                                         |                                                                                      |
| space group                                      | P 1                                               |                                                                                      |
| a, b, c (Å)                                      | 7.581(2), 9.702(3), 36.973(9)                     |                                                                                      |
| α, β, γ (°)                                      | 82.962(5), 86.112(5), 89.740(5)                   |                                                                                      |
| Volume (Å <sup>3</sup> )                         | 2692.7(13)                                        |                                                                                      |
| Z, Density (calc.) (Mg/m <sup>3</sup> )          | 1, 1.094                                          |                                                                                      |
| Absorption coefficient (mm <sup>-1</sup> )       | 0.064                                             |                                                                                      |
| F(000)                                           | 990                                               |                                                                                      |
| Crystal size (mm <sup>3</sup> )                  | 0.278 x 0.160 x 0.096                             |                                                                                      |
| θ range for data collection (°)                  | 2.225 to 26.458                                   |                                                                                      |
| Limiting indices                                 | -9<=h<=9, -12<=k<=12, -46<=l<=46                  |                                                                                      |
| Reflections collected / unique                   | 32223/ 16659 [R(int)= 01519]                      |                                                                                      |
| Completeness to theta = 25.242°                  | 91.9                                              |                                                                                      |
| Absorption correction                            | Semi-empirical from equivalents                   |                                                                                      |
| Max. and min. transmission                       | 0.7454 and 0.6155                                 |                                                                                      |
| Refinement method                                | Full-matrix least-squares on F <sup>2</sup>       |                                                                                      |
| Data/restraints/parameters                       | 16659 / 61 / 1145                                 |                                                                                      |
| Goodness-of - fit on F <sup>2</sup>              | 1.314                                             |                                                                                      |
| Final R indices [I > 2σ(I)]                      | R1 = 0.1056, wR2 = 0.1872                         |                                                                                      |
| R indices (all data)                             | R1 = 0.1676, wR2 = 0.2302                         |                                                                                      |
| Largest diff. peak and hole (e.Å <sup>-3</sup> ) | 0.637 and -0.588                                  |                                                                                      |

**Table S5. Hydrogen bonds for CSS SIT-ProA-ACN [ $\text{\AA}$  and  $^\circ$ ]**

| Donor --- H....Acceptor | [ARU]     | d(D – H) | d(H...A) | d(D...A)  | <(D - H...A) |
|-------------------------|-----------|----------|----------|-----------|--------------|
| O1A---H1AO...O1C        | [x,y,z]   | 0.82     | 1.98     | 2.777(9)  | 162          |
| O2---H2O...O1B          | [x,1+y,z] | 0.82     | 1.87     | 2.565(12) | 143          |
| O1B---H1BO...O1D        | [x,y,z]   | 0.82     | 2.01     | 2.758(10) | 151          |
| O1C---H1OC...N1W        | [x,1+y,z] | 0.82     | 2.56     | 2.879(16) | 105          |
| O1D---H1DO...O1A        | [x,y,z]   | 0.82     | 2.23     | 2.853(10) | 133          |

## 2.5 Zymonic acid cocrystal hydrate (CSS SIT-ZA-H<sub>2</sub>O) (2:1:1) (CCDC: 2000526)

| Structure                                        | CSS SIT-ZA-H <sub>2</sub> O                     | Asymmetric Unit representation                                                       |
|--------------------------------------------------|-------------------------------------------------|--------------------------------------------------------------------------------------|
| Empirical formula                                | C <sub>64</sub> H <sub>109</sub> O <sub>8</sub> | 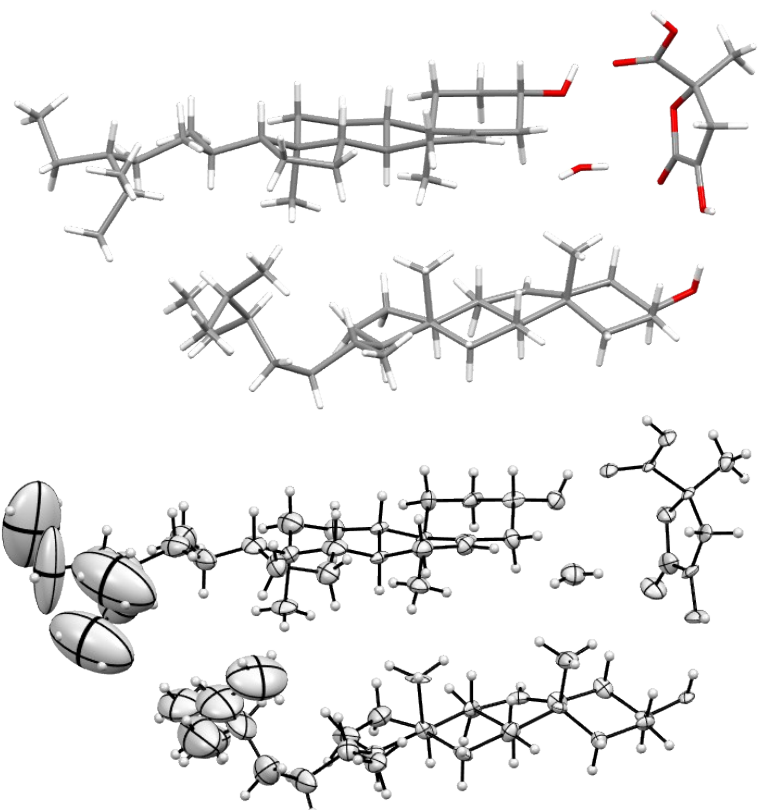 |
| Formula Weight                                   | 1006.51                                         |                                                                                      |
| Temperature (K)                                  | 100(2)                                          |                                                                                      |
| Wavelength (Å)                                   | 0.71073                                         |                                                                                      |
| Crystal system                                   | Monoclinic                                      |                                                                                      |
| space group                                      | C 2                                             |                                                                                      |
| a, b, c (Å)                                      | 77.42(2), 7.6086(18), 9.924(3)                  |                                                                                      |
| α, β, γ (°)                                      | 90, 90.948(7), 90                               |                                                                                      |
| Volume (Å <sup>3</sup> )                         | 5845(3)                                         |                                                                                      |
| Z, Density (calc.) (Mg/m <sup>3</sup> )          | 4, 1.144                                        |                                                                                      |
| Absorption coefficient (mm <sup>-1</sup> )       | 0.073                                           |                                                                                      |
| F(000)                                           | 2228                                            |                                                                                      |
| Crystal size (mm <sup>3</sup> )                  | 0.2 x 0.1 x 0.1                                 |                                                                                      |
| θ range for data collection (°)                  | 2.127 to 22.238                                 |                                                                                      |
| Limiting indices                                 | -82 ≤ h ≤ 82, -8 ≤ k ≤ 8, -10 ≤ l ≤ 10          |                                                                                      |
| Reflections collected / unique                   | 38307 / 7367 [R(int)=0.3422]                    |                                                                                      |
| Completeness to theta = 25.242°                  | 99.6                                            |                                                                                      |
| Absorption correction                            | Semi-empirical from equivalents                 |                                                                                      |
| Max. and min. transmission                       | 0.7447 and 0.4684                               |                                                                                      |
| Refinement method                                | Full-matrix least-squares on F <sup>2</sup>     |                                                                                      |
| Data/restraints/parameters                       | 7367 / 41 / 638                                 |                                                                                      |
| Goodness-of-fit on F <sup>2</sup>                | 0.882                                           |                                                                                      |
| Final R indices [I > 2σ(I)]                      | R1 = 0.0602, wR2 = 0.0934                       |                                                                                      |
| R indices (all data)                             | R1 = 0.1580, wR2 = 0.1155                       |                                                                                      |
| Largest diff. peak and hole (e.Å <sup>-3</sup> ) | 0.268 and -0.227                                |                                                                                      |

**Table S6. Hydrogen bonds for CSS SIT-ZA-H<sub>2</sub>O [Å and °]**

| Donor --- H....Acceptor | [ARU]     | d(D – H) | d(H...A) | d(D...A) | <(D - H...A) |
|-------------------------|-----------|----------|----------|----------|--------------|
| O1A---H1OA...O1         | [x,y,z]   | 0.82     | 2.43     | 2.768(7) | 105          |
| O2---H2...O1B           | [x,y,1+z] | 0.82     | 1.75     | 2.558(7) | 169          |
| O4---H4...O1W           | [x,1+y,z] | 0.82     | 1.69     | 2.514(9) | 177          |
| O1B---H1OB...O4         | [x,y,z]   | 0.82     | 2.08     | 2.888(7) | 168          |
| O1W---H1WA... ?         |           | 0.80(3)  |          |          |              |
| O1W---H1WB...O5         | [x,y,z]   | 0.80(5)  | 1.89(5)  | 2.672(9) | 164(9)       |

## 2.6 Gallic acid cocrystal (CSS SIT-GA) (4:1) (CCDC: 2000527)

| Structure                                        | CSS SIT-GA                                       | Asymmetric Unit representation                                                       |
|--------------------------------------------------|--------------------------------------------------|--------------------------------------------------------------------------------------|
| Empirical formula                                | C <sub>123</sub> H <sub>206</sub> O <sub>9</sub> | 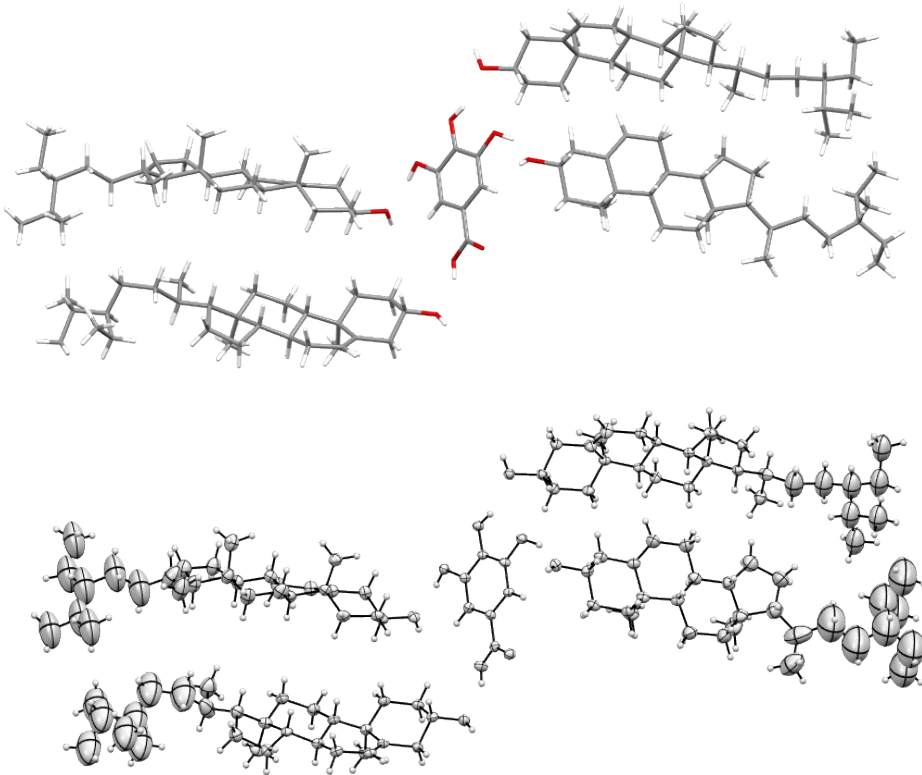 |
| Formula Weight                                   | 1828.87                                          |                                                                                      |
| Temperature (K)                                  | 100(2)                                           |                                                                                      |
| Wavelength (Å)                                   | 0.71073                                          |                                                                                      |
| Crystal system                                   | Monoclinic                                       |                                                                                      |
| space group                                      | P 21                                             |                                                                                      |
| a, b, c (Å)                                      | 10.7439(5), 13.6989(6), 38.1228(19)              |                                                                                      |
| α, β, γ (°)                                      | 90, 93.002(2), 90                                |                                                                                      |
| Volume (Å <sup>3</sup> )                         | 5603.2(5)                                        |                                                                                      |
| Z, Density (calc.) (Mg/m <sup>3</sup> )          | 2, 1.084                                         |                                                                                      |
| Absorption coefficient (mm <sup>-1</sup> )       | 0.066                                            |                                                                                      |
| F(000)                                           | 2032                                             |                                                                                      |
| Crystal size (mm <sup>3</sup> )                  | 0.2 x 0.1 x 0.1                                  |                                                                                      |
| θ range for data collection (°)                  | 2.140 to 27.136                                  |                                                                                      |
| Limiting indices                                 | -13 ≤ h ≤ 13, -17 ≤ k ≤ 17, -48 ≤ l ≤ 48         |                                                                                      |
| Reflections collected / unique                   | 99282 / 24652 [R(int) = 0.0712]                  |                                                                                      |
| Completeness to theta = 25.242°                  | 99.8                                             |                                                                                      |
| Absorption correction                            | Empirical                                        |                                                                                      |
| Max. and min. transmission                       | 0.5 and 0.5                                      |                                                                                      |
| Refinement method                                | Full-matrix least-squares on F <sup>2</sup>      |                                                                                      |
| Data/restraints/parameters                       | 24652 / 66 / 1042                                |                                                                                      |
| Goodness-of-fit on F <sup>2</sup>                | 1.053                                            |                                                                                      |
| Final R indices [I > 2σ(I)]                      | R1 = 0.0897, wR2 = 0.2458                        |                                                                                      |
| R indices (all data)                             | R1 = 0.1117, wR2 = 0.2775                        |                                                                                      |
| Largest diff. peak and hole (e.Å <sup>-3</sup> ) | 1.939 and -0.1669                                |                                                                                      |



**Table S7. Hydrogen bonds for CSS SIT-GA [ $\text{\AA}$  and  $^\circ$ ]**

| Donor --- H...Acceptor | [ARU]            | d(D – H) | d(H...A) | d(D...A) | <(D - H...A) |
|------------------------|------------------|----------|----------|----------|--------------|
| O1A---H1AO...O3        | [1-x,-1/2+y,1-z] | 0.84     | 2.49     | 2.928(4) | 113          |
| O1A---H1AO...O4        | [1-x,-1/2+y,1-z] | 0.84     | 1.94     | 2.779(4) | 174          |
| O2---H2...O1C          | [ ]              | 0.84     | 1.79     | 2.536(4) | 147          |
| O3---H3A...O1D         | [ ]              | 0.84     | 1.79     | 2.613(5) | 167          |
| O4---H4O...O1B         | [ ]              | 0.84     | 1.95     | 2.694(5) | 147          |
| O4---H4O...O5          | [ ]              | 0.84     | 2.30     | 2.738(4) | 113          |
| O5---H5O...O1A         | [ ]              | 0.84     | 2.05     | 2.688(4) | 132          |
| O1B---H1BO...O1        | [1-x,1/2+y,1-z]  | 0.84     | 2.08     | 2.907(4) | 170          |
| O1C---H1CO...O3        | [2-x,-1/2+y,1-z] | 0.84     | 2.04     | 2.846(4) | 161          |
| O1D---H1DO...O1        | [2-x,1/2+y,1-z]  | 0.84     | 1.87     | 2.670(4) | 160          |

### 3. Synthesis of the different crystal forms

Details of synthesis and characterization of each form can be found at Table S2.  $\beta$ -sitosterol (SIT) used in this study was of reagent grade and used as received from Sigma-Aldrich with purity of 79.3% (according to Gas Chromatography Area %). Stoichiometry has been assessed based on NMR and TGA measurements when crystal structure is not available.

**3.1 Benzyl alcohol solvate hydrate (CSS SIT-BzOH-H<sub>2</sub>O) (4:1:1).** It was obtained by slow evaporation in benzyl alcohol at 25 °C, (82 days). Its PXRD diagram has been indexed.

**3.2 Propionic acid cocrystal hydrate (CSS SIT-ProA-H<sub>2</sub>O I) (2:1:1).** It was obtained by antisolvent precipitation (water) through CSS SIT propionic acid solution at 25 °C. Its PXRD diagram has been indexed.

**3.3 Propionic acid cocrystal hydrate (CSS SIT-ProA-H<sub>2</sub>O II) (4:1:1).** ). It was obtained by solvent mediated transformation in CSS SIT-propionic acid in acetone at 25 °C, (1 day). Its PXRD diagram has been indexed.

**3.4 Propionic acid cocrystal ACN solvate (CSS SIT-ProA-ACN) (4:1:1).** It was obtained by slow precipitation in ACN atmosphere at 25 °C using CSS SIT-propionic acid acetone solution as raw material, (3 days).

**3.5 Zymonic acid cocrystal hydrate (CSS SIT-ZA-H<sub>2</sub>O) (2:1:1).** It was obtained by slow evaporation in diethyl ether at 25 °C, (25 days). Its PXRD diagram has been indexed.

**3.6 Gallic acid cocrystal (CSS SIT-GA) (4:1).** It was obtained by solvent mediated transformation in AcOEt, (m.p 194 °C). Its PXRD diagram has been indexed.

**3.7 4-Hydroxybenzoic acid cocrystal (CSS SIT-4-HBA I) (1:1).** It was obtained by solvent mediated transformation in AcOEt, (m.p. 145 °C). Its PXRD diagram has been indexed.

**3.8 4-Hydroxybenzoic acid cocrystal (CSS SIT-4-HBA-H<sub>2</sub>O II) (2:2:1).** It was obtained by reaction crystallization in AcOEt, (m.p. 163 °C). Its PXRD diagram has been indexed.

**3.9 3,4-Dihydroxybenzoic acid cocrystal hydrate (CSS SIT-3,4-DHBA-H<sub>2</sub>O) (1:2:1).** It was obtained by reaction crystallization in AcOEt (m.p 157 °C). Its PXRD diagram has been indexed.

**Table S8.** Synthesis of the different crystal forms

| Crystal form CSS              | SIT<br>CSS<br>(mg) | Coformer     | Coformer<br>(amount) | Solvents<br>(mL)        | T<br>(°C) | Cocrystal screening          | Time<br>(day) | Crystal form | molar ratio <sup>a</sup> |
|-------------------------------|--------------------|--------------|----------------------|-------------------------|-----------|------------------------------|---------------|--------------|--------------------------|
| SIT-BzOH-H <sub>2</sub> O     | 20                 | -            | -                    | BzOH (0.4)              | 25        | Slow evaporation             | 82            | solvate      | (4:1:1)                  |
| SIT-ProA-H <sub>2</sub> O I   | 20                 |              | 0.3 mL               | Water (0.6)             | 25        | Antisolvent<br>precipitation | seconds       | cc           | (2:1:1)                  |
| SIT-ProA-H <sub>2</sub> O II  | 50                 |              | 0.5 mL               | Acetone (0.5)           | 25        | SMT                          | 1             | cc           | (4:1:1)                  |
| SIT-ProA-ACN                  | 50                 |              | 0.25mL               | Acetone (0.5)           | 25        | ACN atmosphere               | 3             | cc           | (4:1:1)                  |
| SIT-ZA-H <sub>2</sub> O       | 20                 | Pyruvic acid | 0.1 mL               | Et <sub>2</sub> O (0.2) | 25        | Slow evaporation             | 25            | cc           | (2:1:1)                  |
| SIT-GA                        | 625                | Gallic acid  | 98 mg                | AcOEt (5.0)             | 25        | SMT                          | 1             | cc           | (4:1)                    |
| SIT-4-HBA I                   | 100                | 4-HBA        | 37 mg                | AcOEt (0.3)             | 25        | SMT                          | 1             | cc           | (1:1)                    |
| SIT-4-HBA-H <sub>2</sub> O II | 2500               | 4-HBA        | 4000 mg              | AcOEt (15.0)            | 25        | RC, coformer saturated       | 1             | cc           | (2:2:1)                  |
| SIT-3,4-DHBA-H <sub>2</sub> O | 45                 | 3,4-DHBA     | 50 mg                | AcOEt (0.1)             | 25        | RC, coformer saturated       | 1             | cc           | (1:2:1)                  |

<sup>a</sup> Molar ratio according to SCXRD, <sup>1</sup>H-NMR and TGA analysis

## **4.- Analytical methodologies: determination of phytosterols content (%)**

### **4.1 High-performance liquid chromatography (HPLC)**

The tested samples were:  $\beta$ -sitosterol from Ph. Eu., CSS SIT-ProA-H<sub>2</sub>O I, CSS SIT-ProA-H<sub>2</sub>O II, CSS SIT-ZA-H<sub>2</sub>O, CSS SIT-GA, CSS SIT-4-HBA I, CSS SIT-4-HBA-H<sub>2</sub>O II and CSS SIT-3,4-DHBA-H<sub>2</sub>O.

Sample preparation: 10 mg of the compound were dissolved in 10 mL of THF. Each sample was prepared three times.

Standard sample:  $\beta$ -sitosterol from Ph. Eu. Reference Standard, ref. (Y0001615) (72.5%, C<sub>29</sub>H<sub>50</sub>O).

Calibration curve: a stock solution of approximately 1500 mg/L  $\beta$ -sitosterol (10 mg/ 5 mL) in THF was prepared. Three more standards between 0.4 mg/L and 1100 mg/L by dilution in THF was prepared. Every standard was injected twice.

Equipment:

- Chromatograph: Waters Alliance 2695.
- Detector: Waters PDA 2996.
- Balance: Mettler Toledo AT261.
- Software: Empower, Waters.

Analytical conditions:

- Column: YMC-Pack Pro C18, 5  $\mu$ m, 12 nm, 50 x 4.6 mm.
- Mobile phase: Methanol – Acetonitrile 20:80 (v/v).
- Flow rate: 1.0 mL/min
- Injection: 10  $\mu$ L
- Detection (UV): 210 nm

### **4.2 High-performance liquid chromatography – high resolution mass (HPLC-HRMS)**

The tested sample was CSS SIT-GA.

Equipment:

- Chromatograph: Accela (Thermo Fisher Scientific).
- Detector: Accela (PDA) + LTQ-Orbitrap Velos (HRMS).
- Software: Xcalibur (Thermo Fisher Scientific).

Analytical conditions:

- Column: YMC-Pack Pro C18, 5  $\mu$ m, 12 nm, 50 x 4.6 mm.
- Mobile phase: Methanol – Acetonitrile 20:80 (v/v).
- Flow rate: 1.0 mL/min
- Injection: 10  $\mu$ L
- Detection (UV): 210 nm
- Ion source (MS): APCI
- Polarity (MS): Positive

### 4.3 Gas chromatography-mass spectrometry (GS-MS)

Samples tested were  $\beta$ -sitosterol raw material (BCB50067V) and CSS SIT-GA.

Sample preparation: 1.01 mg of the compound were dissolved in 1 mL of DCM/Methanol (1:1).

Tested and standard samples derivatization: 100  $\mu$ L of both solutions were totally dried. Then, 150  $\mu$ L of N,O-Bis(trimethylsilyl)trifluoroacetamide (BSTFA) were added and the resulting solution was heated up to 150  $^{\circ}$ C for 1 hour. The solution was cooled down at room temperature and it was totally dried under N<sub>2</sub> flow. Both solids were suspended in 1 mL of hexane. Finally, 1  $\mu$ L of each solution were injected.

Equipment: Thermo Scientific trace CG Ultra connected to Thermo Scientific ITQ 900.

Analytical conditions:

- Column: Teknokroma Sapiens X5-MS 30 m x 0.25 mm d.i. x 0.25  $\mu$ m d.f.
- Injector:
  - o Injector split/splitless
  - o Injector mode: splitless
  - o Splitless time: 1 min.
  - o Injector temperature: 300  $^{\circ}$ C
  - o Gas: He (1 mL/min)
- Oven method:
  - o Initial temperature: 40  $^{\circ}$ C, Isothermic: 1 min
  - o Step 1: Heating from 40  $^{\circ}$ C to 180  $^{\circ}$ C at a rate of 15  $^{\circ}$ C/min.
  - o Step 2: Heating from 180  $^{\circ}$ C to 320  $^{\circ}$ C at a rate of 6  $^{\circ}$ C/min., Isothermic: 25 min.
- Detector:
  - o Ion source temperature: 200  $^{\circ}$ C
  - o Interface temperature: 320  $^{\circ}$ C
  - o Solvent delay: 5 min.
  - o Mass range: 50 to 900 uma.

### 4.4 Results:

#### 4.4.1 Results obtained by the HPLC analysis:

Three main peaks have been observed during the HPLC analysis of the standard  $\beta$ -sitosterol Ph. Eu (Figure S1) at 6.443, 7.933 and 9.267 min. They were assigned to Stigmasterol, Campesterol and  $\beta$ -Sitosterol respectively according to HRMS analysis of the CSS SIT-GA (Figures S2 to S5) having the following structures:

|                                                                                   |                                                                                   |                                                                                     |
|-----------------------------------------------------------------------------------|-----------------------------------------------------------------------------------|-------------------------------------------------------------------------------------|
| 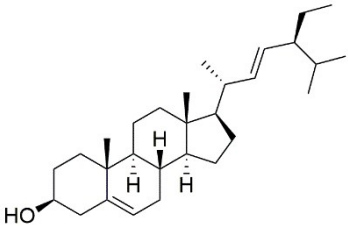 |  |  |
| Stigmasterol                                                                      | Campesterol                                                                       | $\beta$ -Sitosterol                                                                 |
| $C_{29}H_{48}O$<br>M.W.: 412.70                                                   | $C_{28}H_{48}O$<br>M.W.: 400.69                                                   | $C_{29}H_{50}O$<br>M.W.: 414.72                                                     |

**Figure S1:** Chromatogram of the HPLC analysis of  $\beta$ -Sitosterol standard. Run time (minutes) of the identified phytosterols: Stigmasterol (~ 6,4), Campesterol (~ 7,9) and  $\beta$ -Sitosterol (~ 9,3)

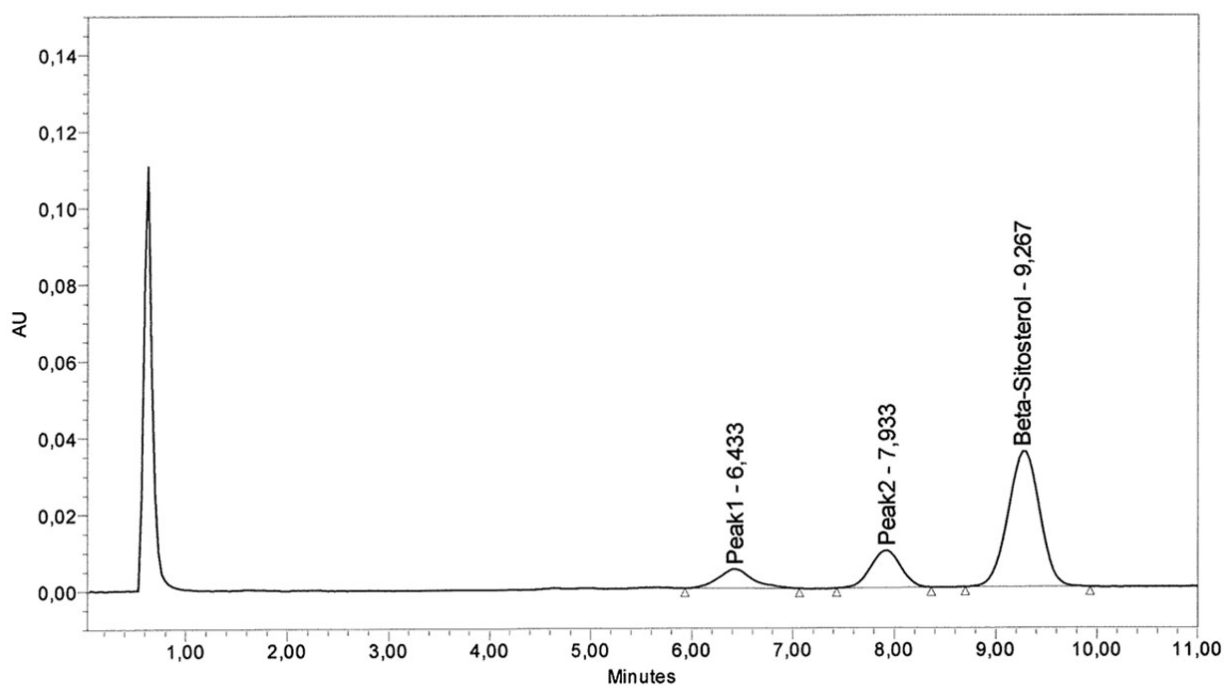

The molecular weight (without 1 molecule of water) of each compound were the following:

- Stigmasterol (peak 1): MS (ES) (+): 395.37 [ $C_{29}H_{47}$ ]<sup>+</sup>
- Campesterol (peak 2): MS (ES) (+): 383.37 [ $C_{28}H_{47}$ ]<sup>+</sup>
- $\beta$ -Sitosterol (peak 3): MS (ES) (+): 397.38 [ $C_{29}H_{49}$ ]<sup>+</sup>

**Figure S2:** Chromatogram of the HPLC analysis of CCS SIT-GA

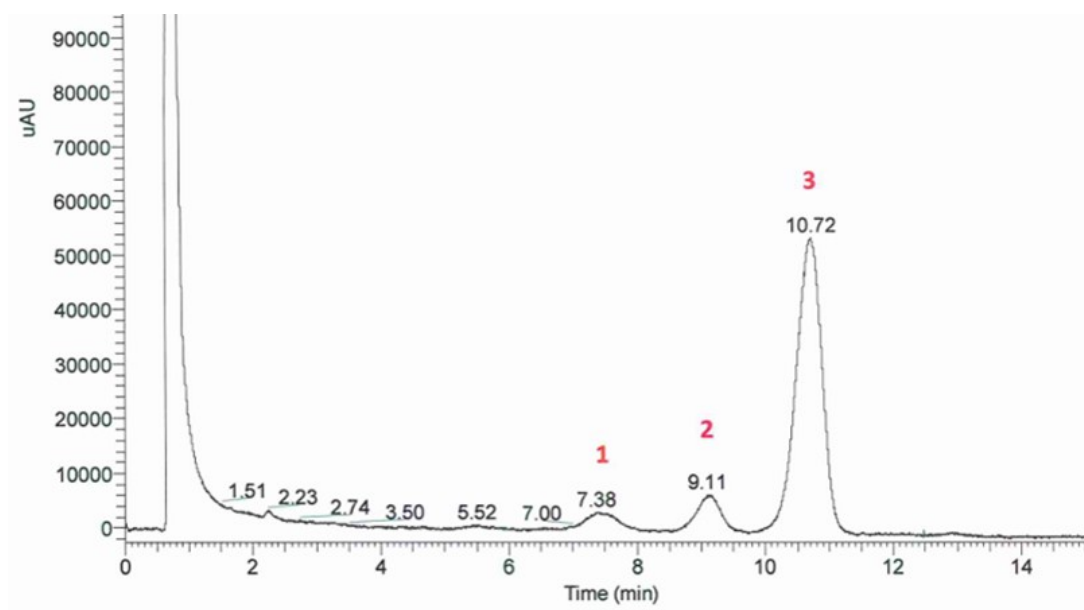

**Figure S3:** FTMS of peak 1 (Stigmasterol): MS (ES) (+): 395.37 [C<sub>29</sub>H<sub>47</sub>]<sup>+</sup>

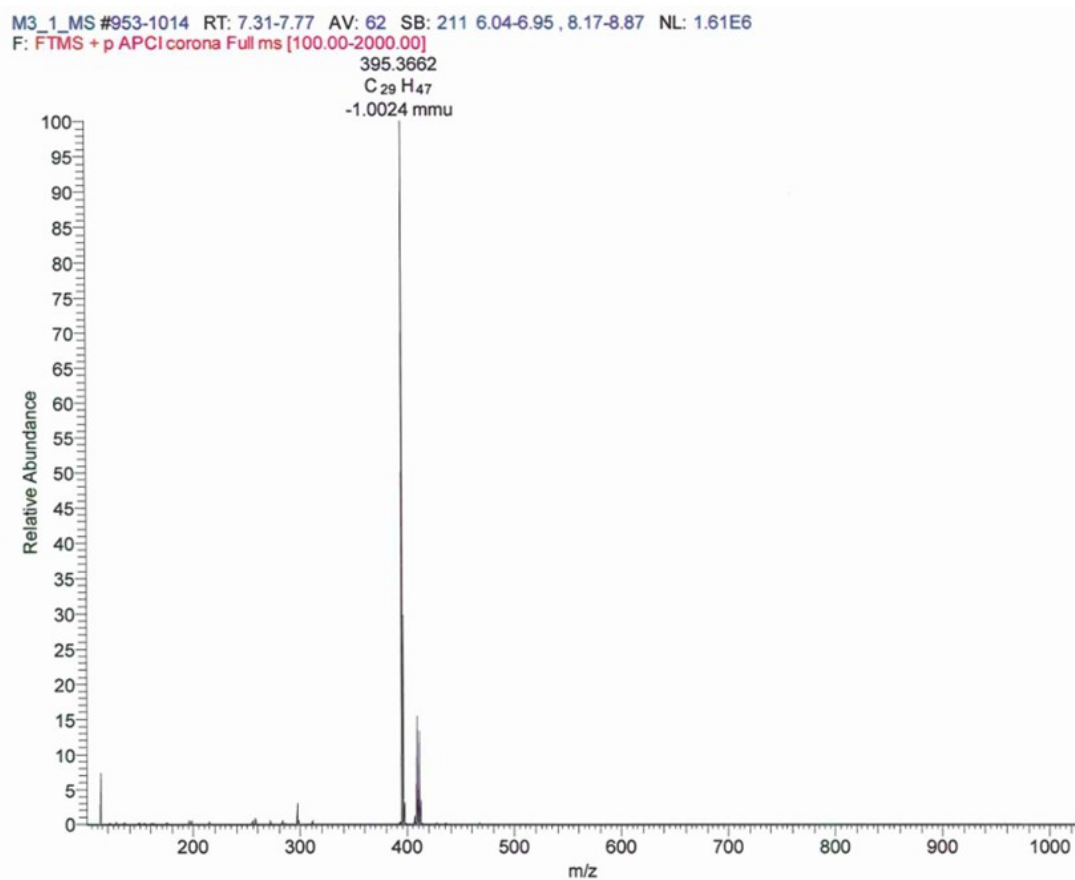

**Figure S4:** FTMS of peak 2 (Campesterol): MS (ES) (+): 383.37 [C<sub>28</sub>H<sub>47</sub>]<sup>+</sup>

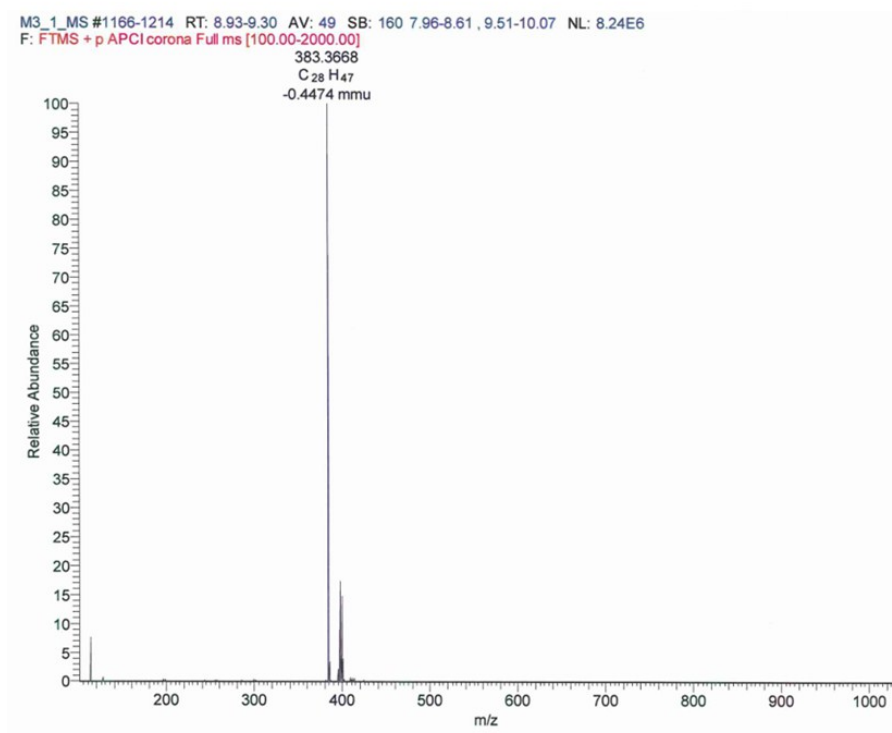

**Figure S5:** FTMS of peak 3 (β-Sitosterol): MS (ES) (+): 397.38 [C<sub>29</sub>H<sub>49</sub>]<sup>+</sup>

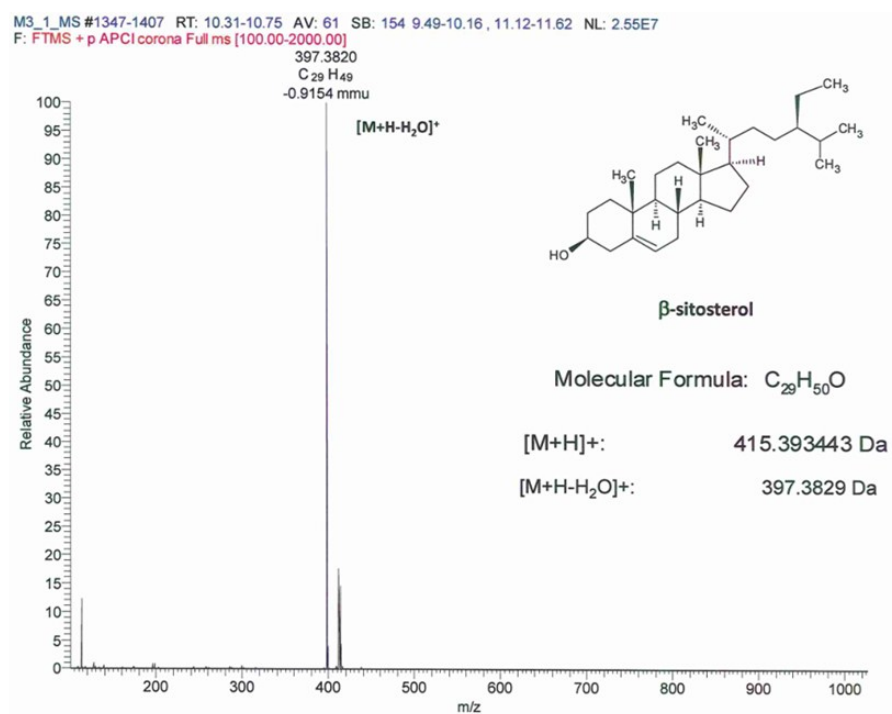



The same peaks have been observed in all the CSS SIT samples as defined above. The results are summarized in the Table 1 of the paper.

#### 4.4.2 Results obtained by the GS-MS analysis:

The main peaks have been observed during GS-MS analysis of both trimethylsilyl (TMS) derivate of two samples above mentioned, which confirm with high precision the identity of the three phytosterols present in all the multicomponent forms of CSS of  $\beta$ -Sitosterol, (Figure S6).

**Figure S6:** Chromatogram of the GS-MS analysis of CSS SIT-GA (black, red and green) and  $\beta$ -Sitosterol Sigma-Aldrich (BCB50067V) (blue)

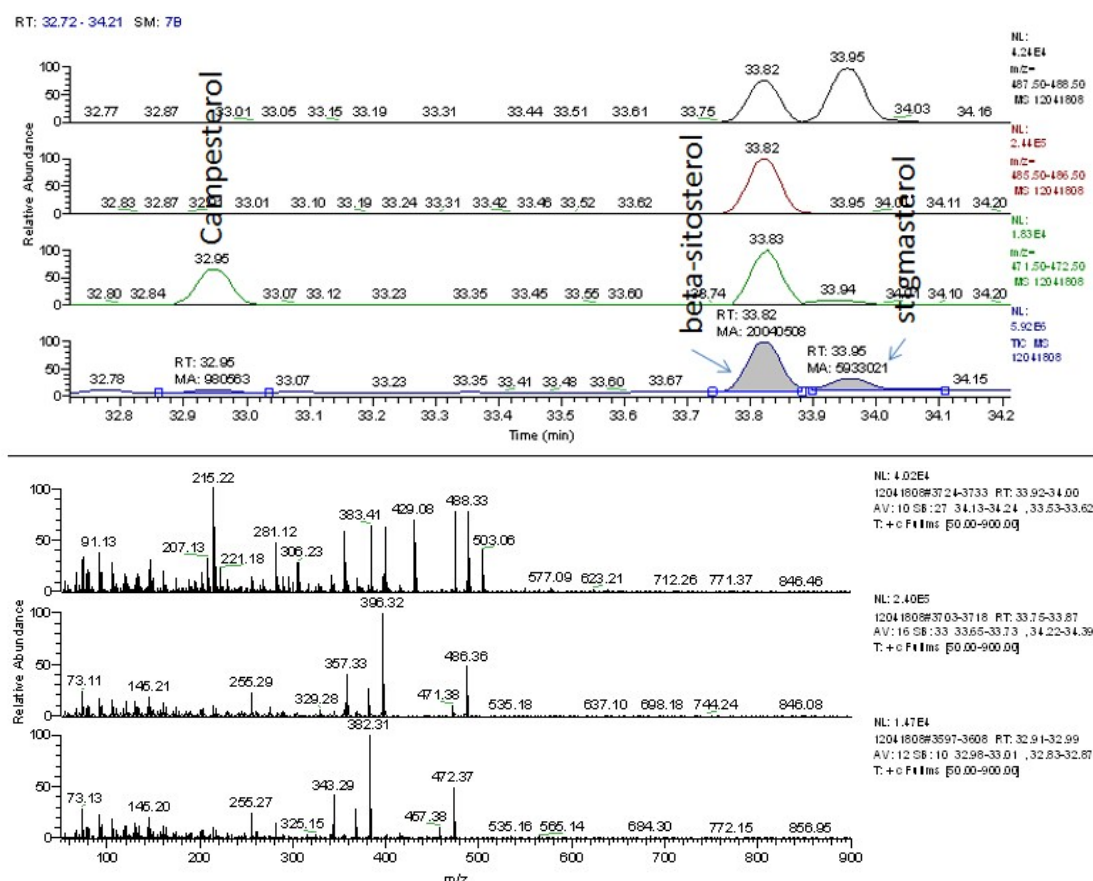

The molecular weights of the observed peaks were the following:

- Stigmasterol - TMS: 486.36
- Campesterol – TMS: 472.37
- $\beta$ -Sitosterol – TMS: 488.33

## 5.- Characterization of the solids

Figure S7: Comparative PXRD diffractograms between different commercial batches of  $\beta$ -Sitosterol: batch BCBS00067V (79.3%) (green) and batch Y0001615 (72.5%) (purple) and simulated from the cif's files (LOFFET (black) and TEXQOC (blue))

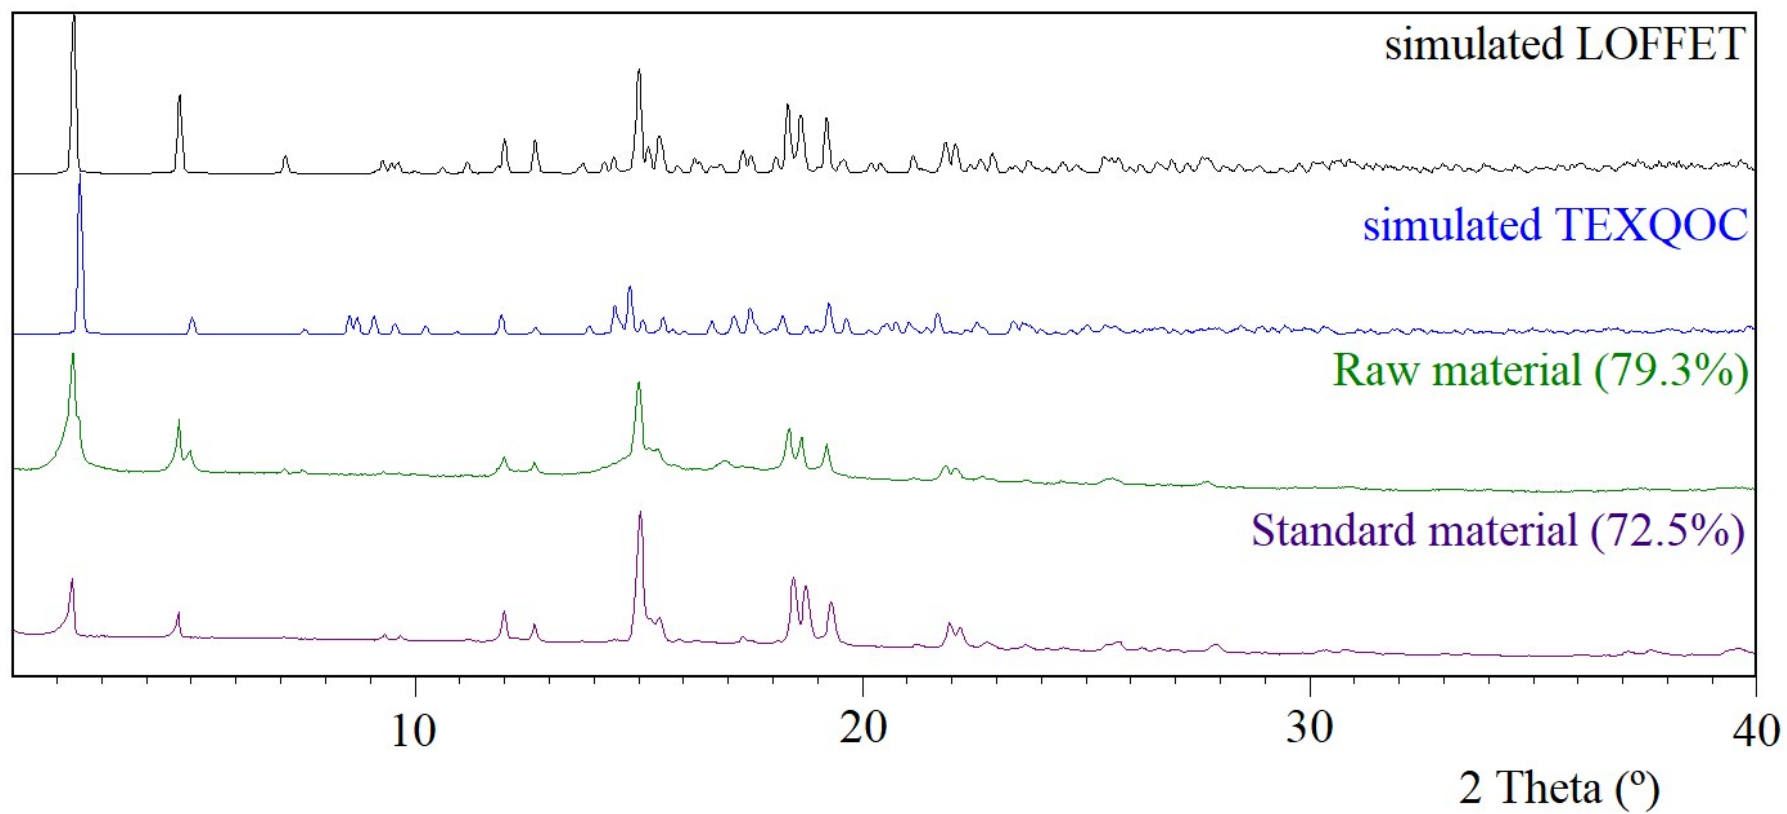

**Figure S8:** The XRPD of benzyl alcohol cocrystal has been indexed with the following proposed triclinic cell:  $a=38.21(3)$  Å,  $b=9.935(2)$  Å,  $c=7.640(2)$  Å,  $\alpha = 88.48(1)^\circ$ ,  $\beta=93.38(3)^\circ$ ,  $\gamma=96.34(4)^\circ$ ,  $V=2877(2)$  Å<sup>3</sup> (Figures of Merit:  $M=24$ ,  $F=94$ ), with number of impurities equal to zero. A  $P1$  space group is compatible with the cell and the cell volume is compatible with 4 molecules of CSS  $\beta$ -Sitosterol, 1 molecule of benzyl alcohol and 1 molecule of water. ( $R_{wp}$ : 9.62;  $R_{exp}$ : 1.62)

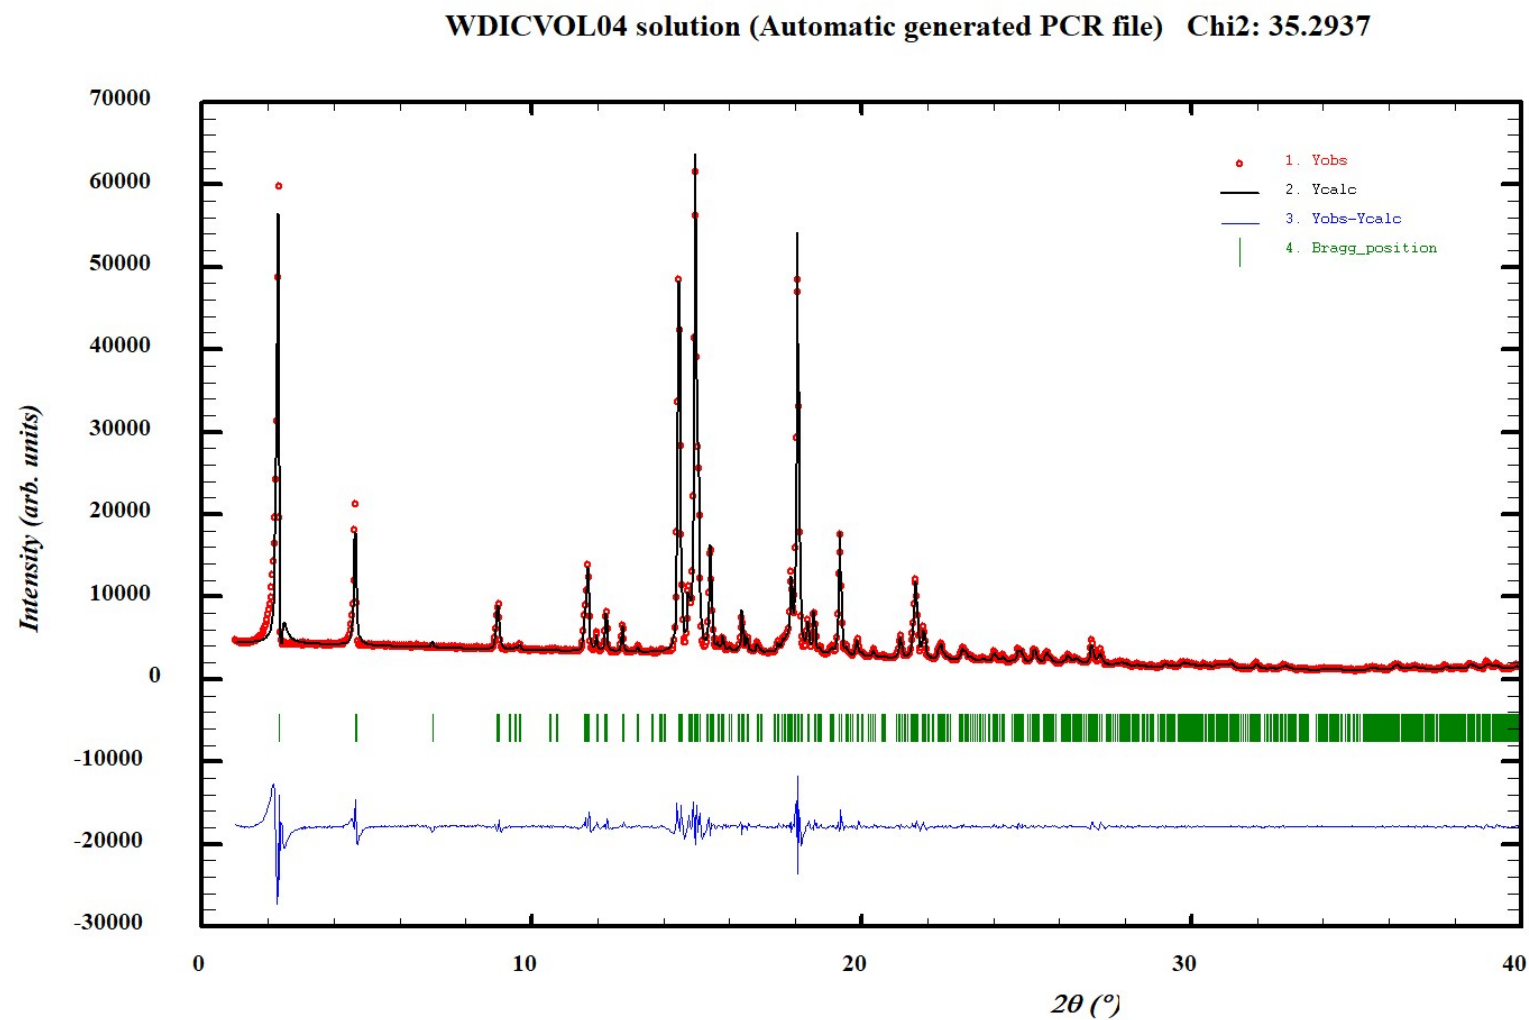

**Figure S9:** The structure was provisionally determined by single crystal X-ray diffraction at 100K showing a molar ratio 4:1:1 of the cocrystal  $\beta$ -Sitosterol:benzyl alcohol:water, with the following triclinic cell:  $a=7.597(3)$  Å,  $b=9.730(4)$  Å,  $c=37.763(14)$  Å,  $\alpha=84.84(6)^\circ$ ,  $\beta=86.089(8)^\circ$ ,  $\gamma=88.219(9)^\circ$ ,  $V=2773(1)$  Å<sup>3</sup>,  $Z=1$  and  $P1$  space group. ( $R_{\text{int}}$  (%) = 7.41; R-Factor (%) = 12.5). Comparative PXRD diffractograms between bulk benzyl alcohol cocrystal and simulated from the cif is shown.

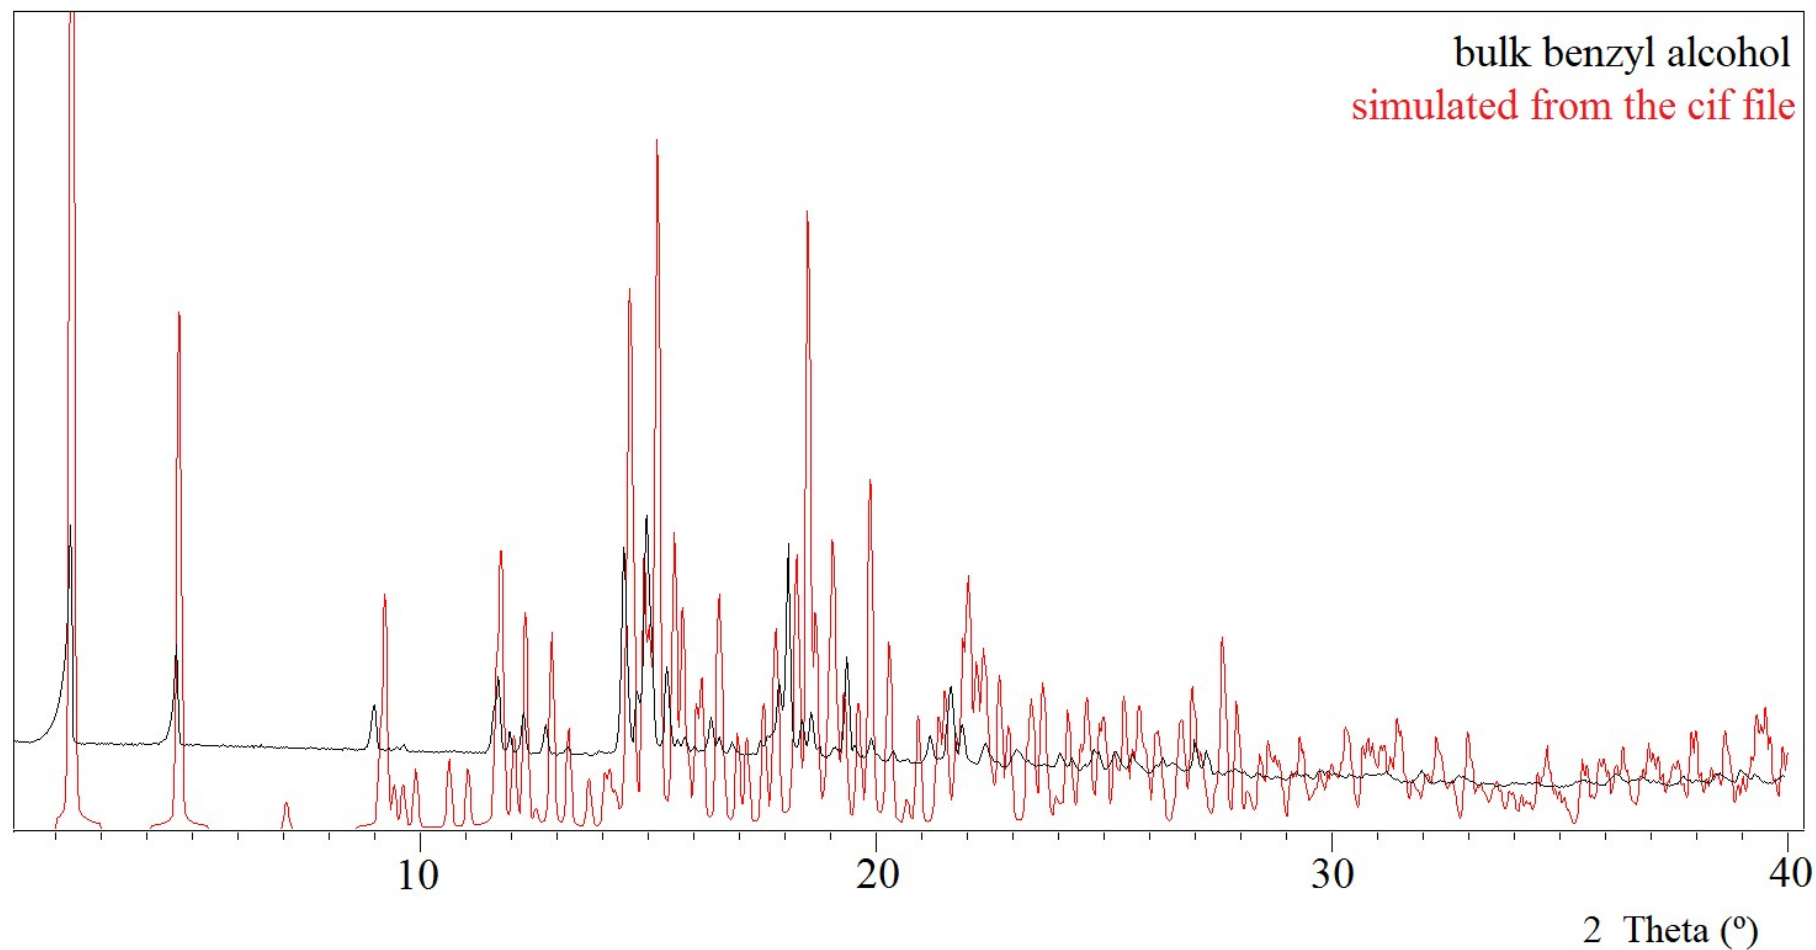

**Figure S10: DSC of CSS SIT-ProA-H<sub>2</sub>O I**

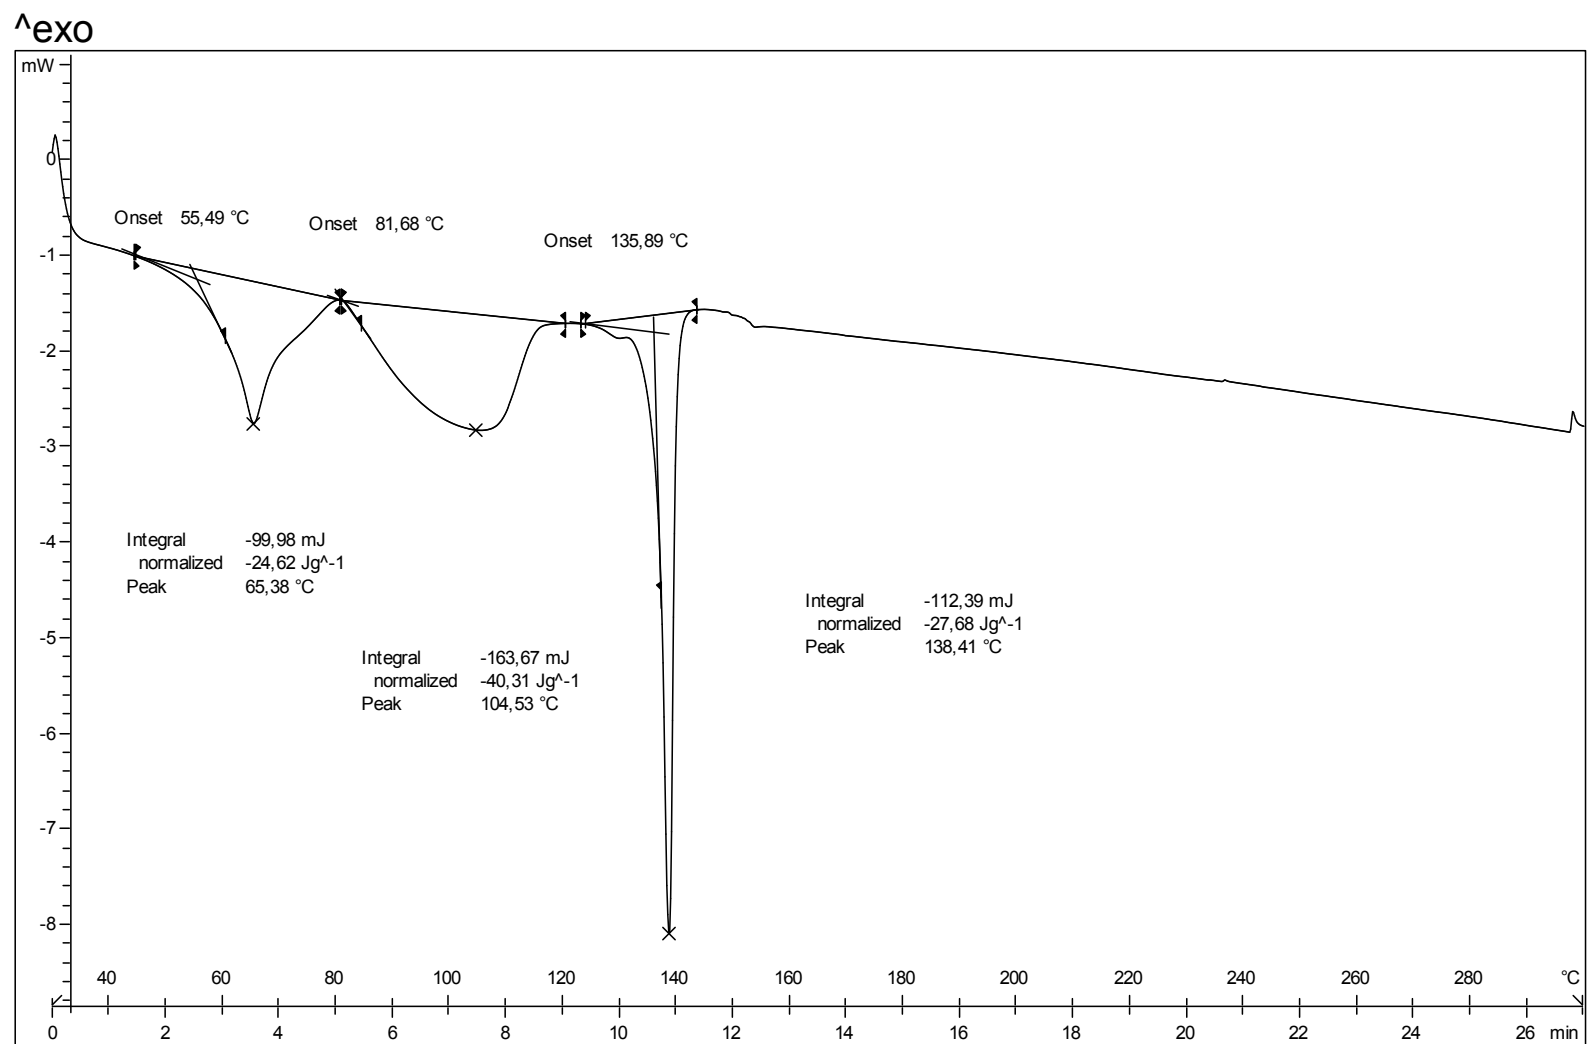

**Figure S11: TGA of SIT-ProA-H<sub>2</sub>O I:** a weight loss of 9.8% is detected from 30 °C to 155 °C which could be attributed to 1 molecule of water and 1 molecule of propionic acid per 2 molecules of CSS  $\beta$ -Sitosterol (theoretical weight loss of 10.0%)

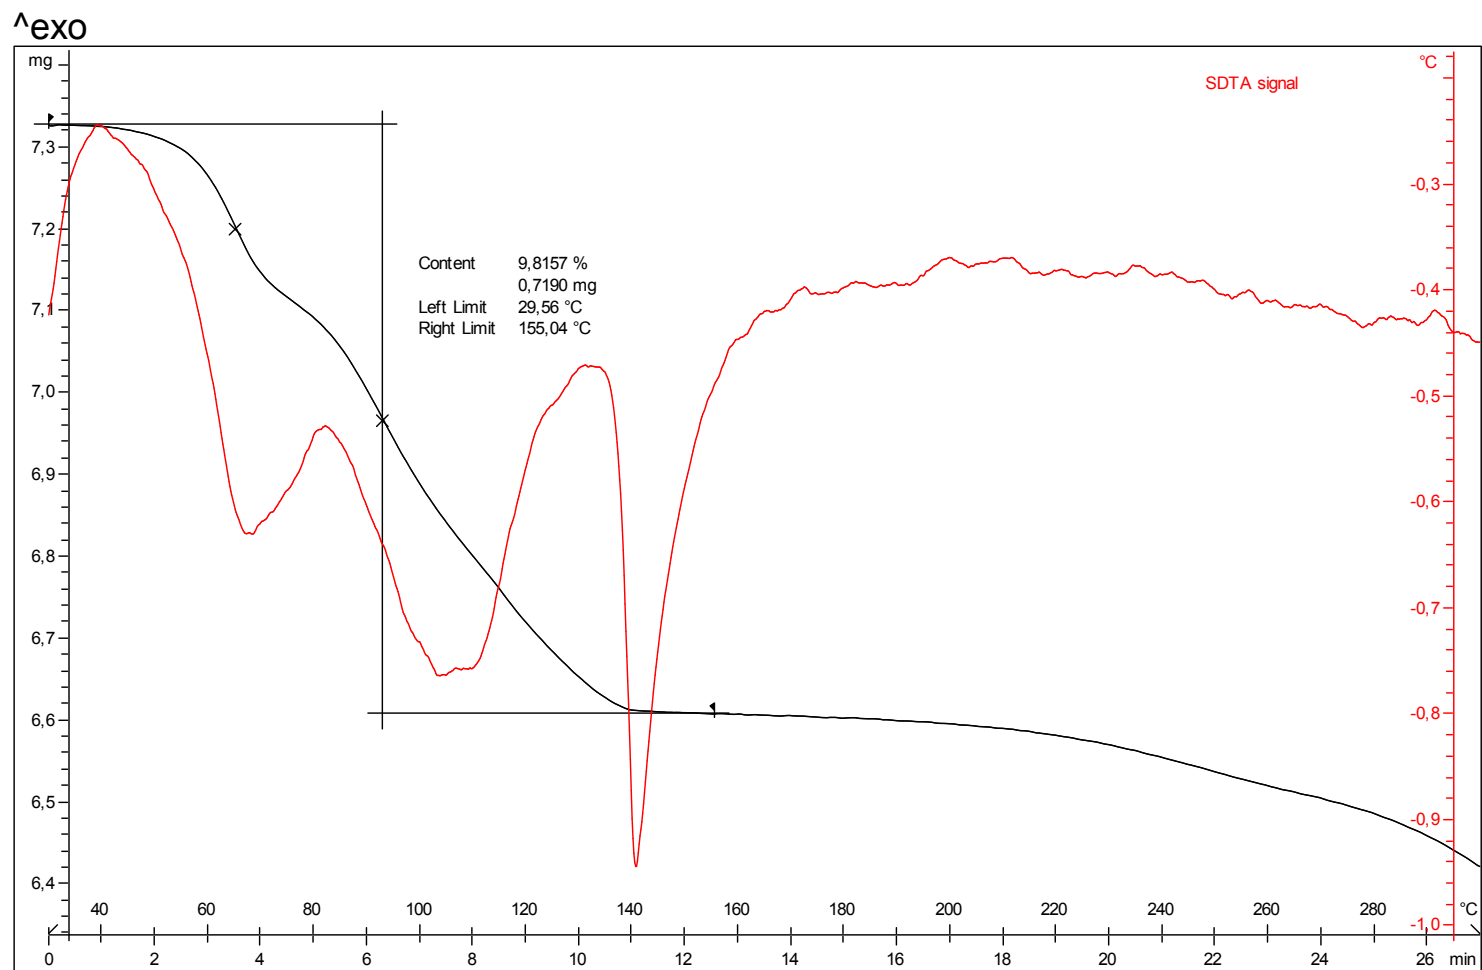

**Figure S12:** The XRPD of SIT-ProA-H<sub>2</sub>O I cocrystal has been indexed with the following proposed monoclinic cell:  $a=40.0(2)$  Å,  $b=7.617(2)$  Å,  $c=9.631(1)$  Å,  $\beta=97.03(3)^\circ$ ,  $V=2914(2)$  Å<sup>3</sup> (Figures of Merit:  $M=50$ ,  $F=140$ ), with number of impurities equal to zero. A  $P2_1$  space group is compatible with the cell and the cell volume is compatible with 2 molecules of CSS  $\beta$ -Sitosterol, 1 molecule of propionic acid and 1 molecule of water. ( $R_{wp}$ : 6.88;  $R_{exp}$ : 1.60)

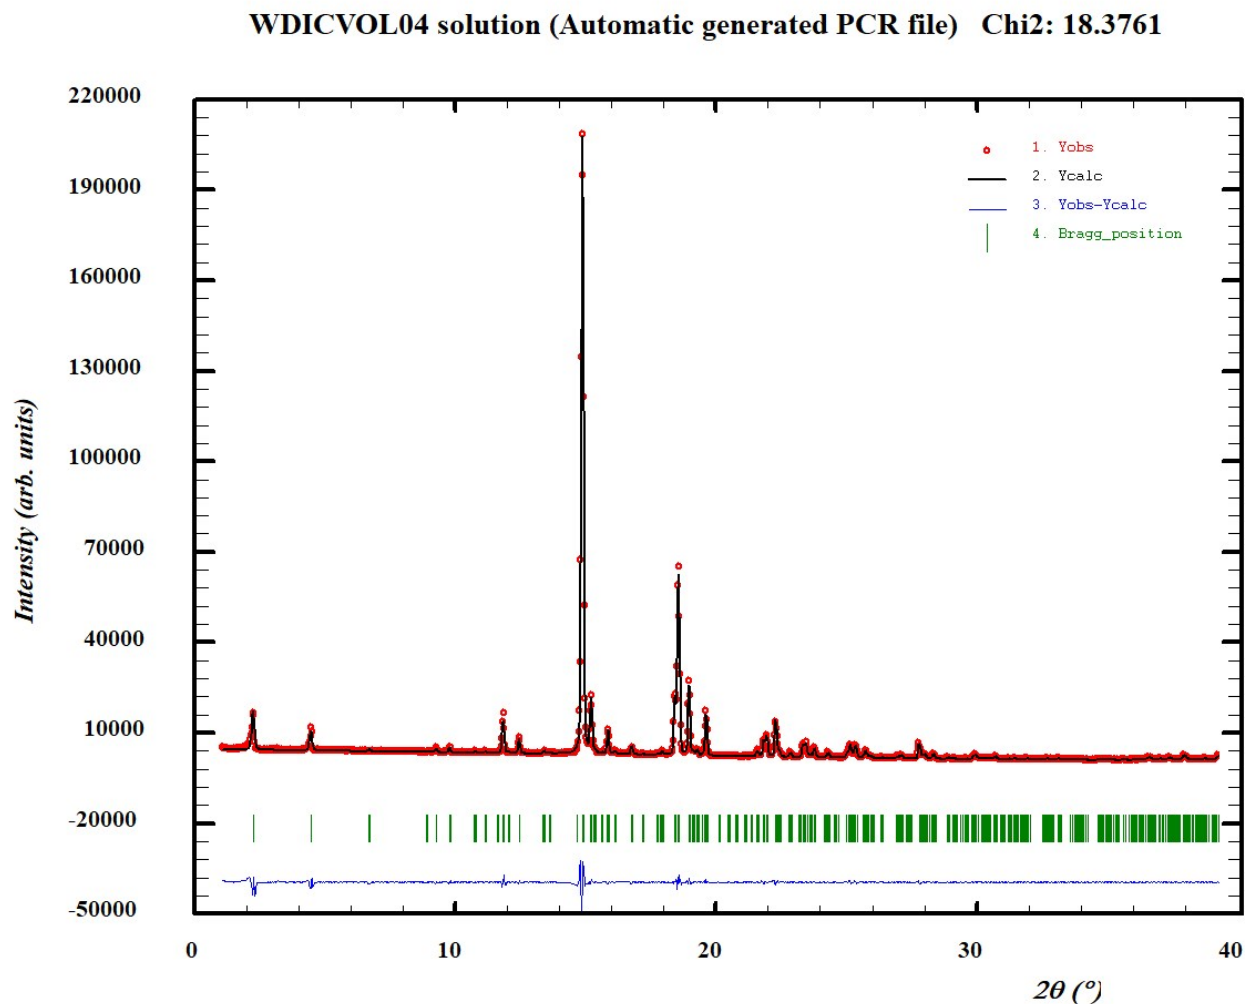

**Figure S13:** The structure was provisionally determined by single crystal X-ray diffraction at 293K showing a molar ratio 2:1:1 of the cocrystal  $\beta$ -Sitosterol:propionic acid:water, with the following monoclinic cell:  $a=9.439(2)$  Å,  $b=7.5391(16)$  Å,  $c=39.635(8)$  Å,  $\beta=95.216(6)^\circ$ ,  $V=2809(1)$  Å<sup>3</sup>,  $Z=2$ , and  $P2_1$  space group. ( $R_{\text{int}}(\%) = 5.11$ ;  $R\text{-Factor}(\%) = 4.5$ ). Comparative PXRD diffractograms between bulk SIT-ProA-H<sub>2</sub>O I cocrystal and simulated from the cif is shown.

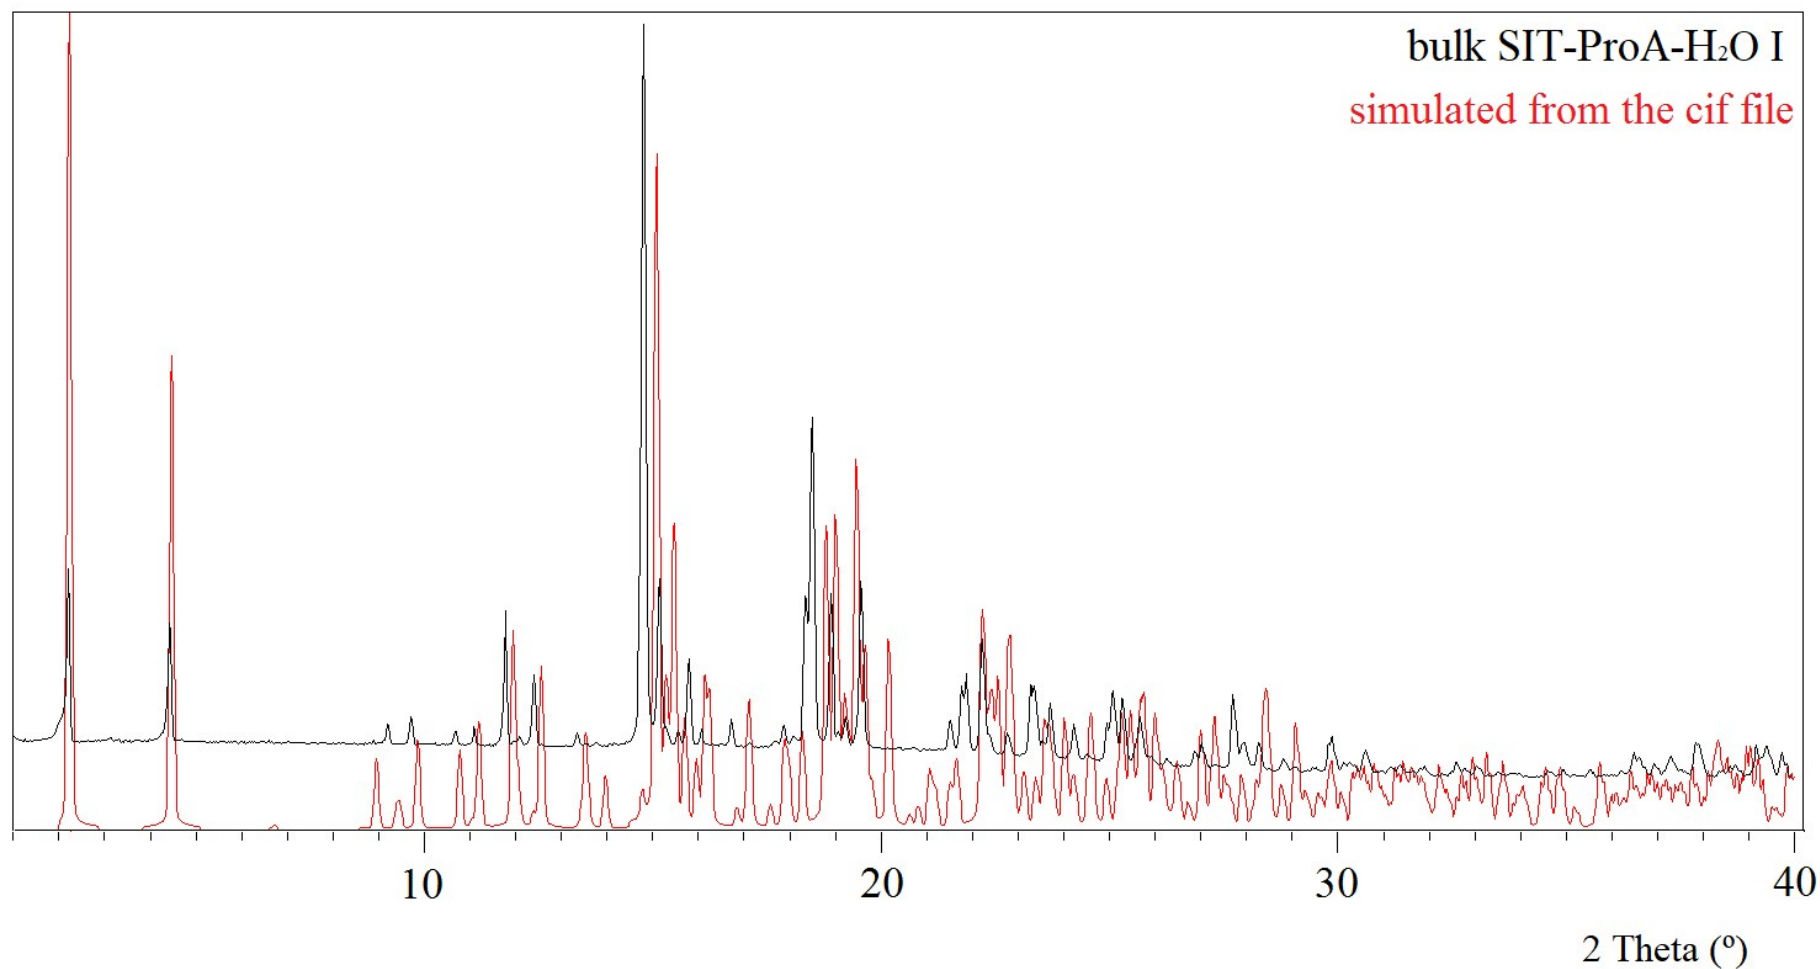



Figure S14:  $^1\text{H}$ -NMR (chloroform- $d$ : delay: 1/pulse: 45°/scans: 32) of SIT-ProA-H<sub>2</sub>O I cocrystal

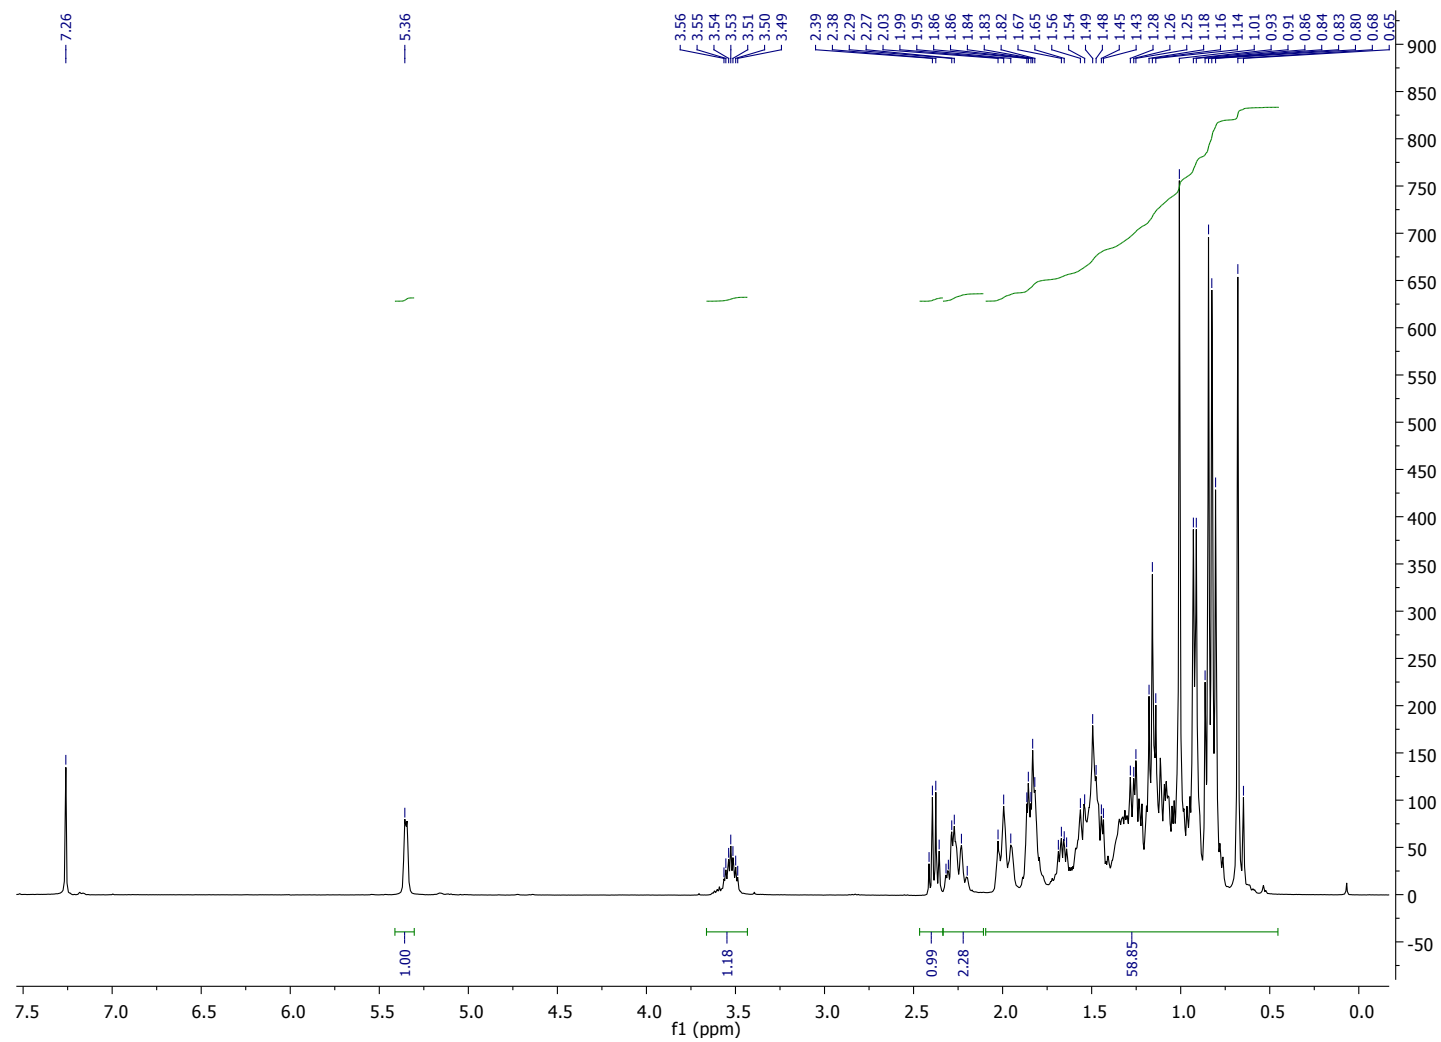

Figure S15: DSC of SIT-ProA-H<sub>2</sub>O II

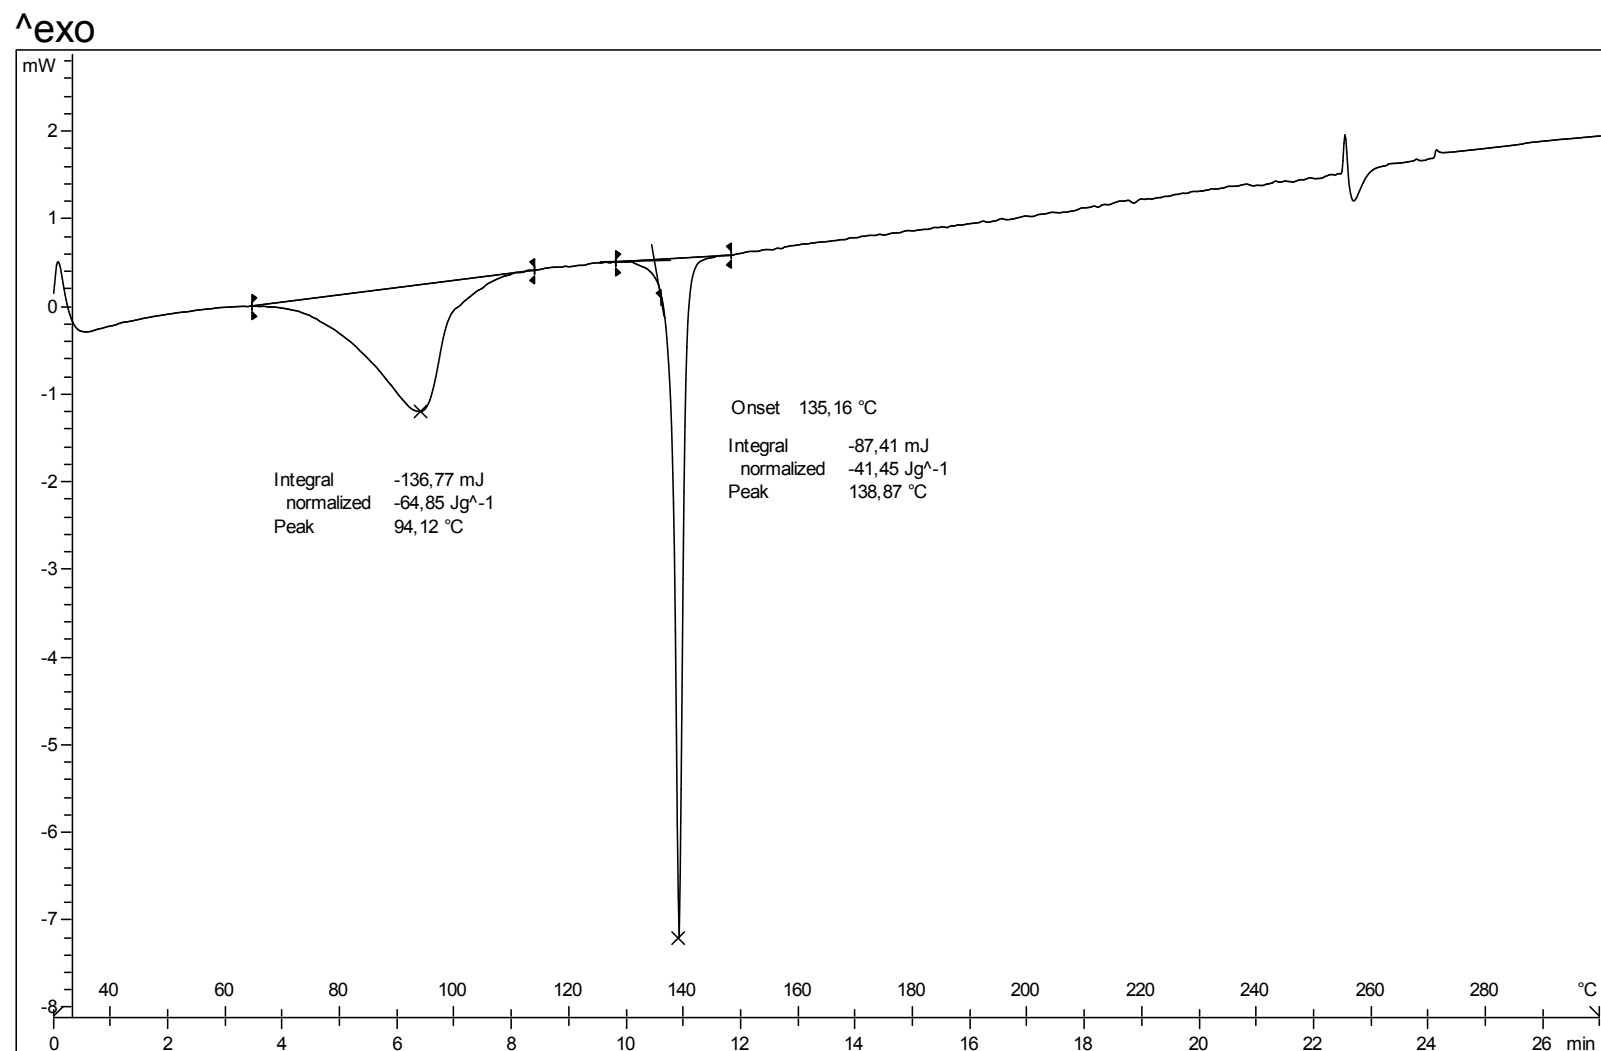

**Figure S16: TGA of SIT-ProA-H<sub>2</sub>O II:** a weight loss of 5.1% is detected from 30 °C to 154 °C which could be attributed to 1 molecule of water and 1 molecule of propionic acid per 4 molecules of CSS  $\beta$ -Sitosterol (theoretical weight loss of 5.3%)

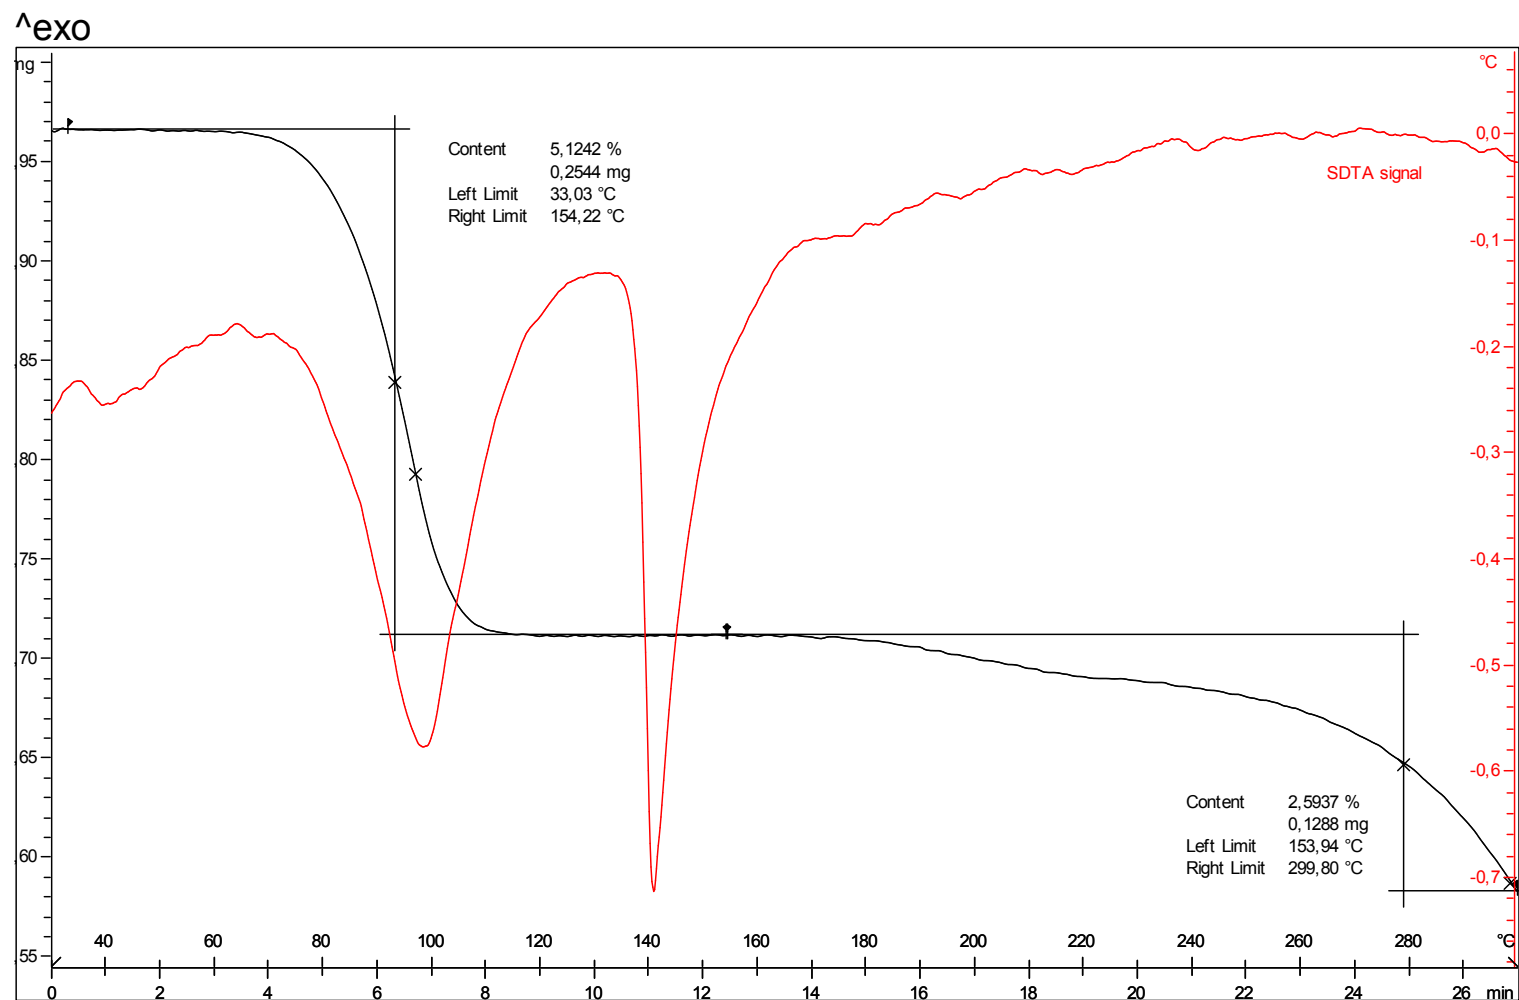

**Figure S17:** The XRPD of SIT-ProA-H<sub>2</sub>O II cocrystal has been indexed with the following proposed monoclinic cell:  $a=28.16(1)$  Å,  $b=7.568(2)$  Å,  $c=26.235(9)$  Å,  $\beta=92.09(2)^\circ$ ,  $V=5587(3)$  Å<sup>3</sup> (Figures of Merit:  $M=28$ ,  $F=102$ ), with number of impurities equal to zero. A  $P2_1$  space group is compatible with the cell and the cell volume is compatible with 4 molecules of CSS  $\beta$ -Sitosterol, 1 molecule of propionic acid and 1 molecule of water. ( $R_{wp}$ : 11.5;  $R_{exp}$ : 1.28)

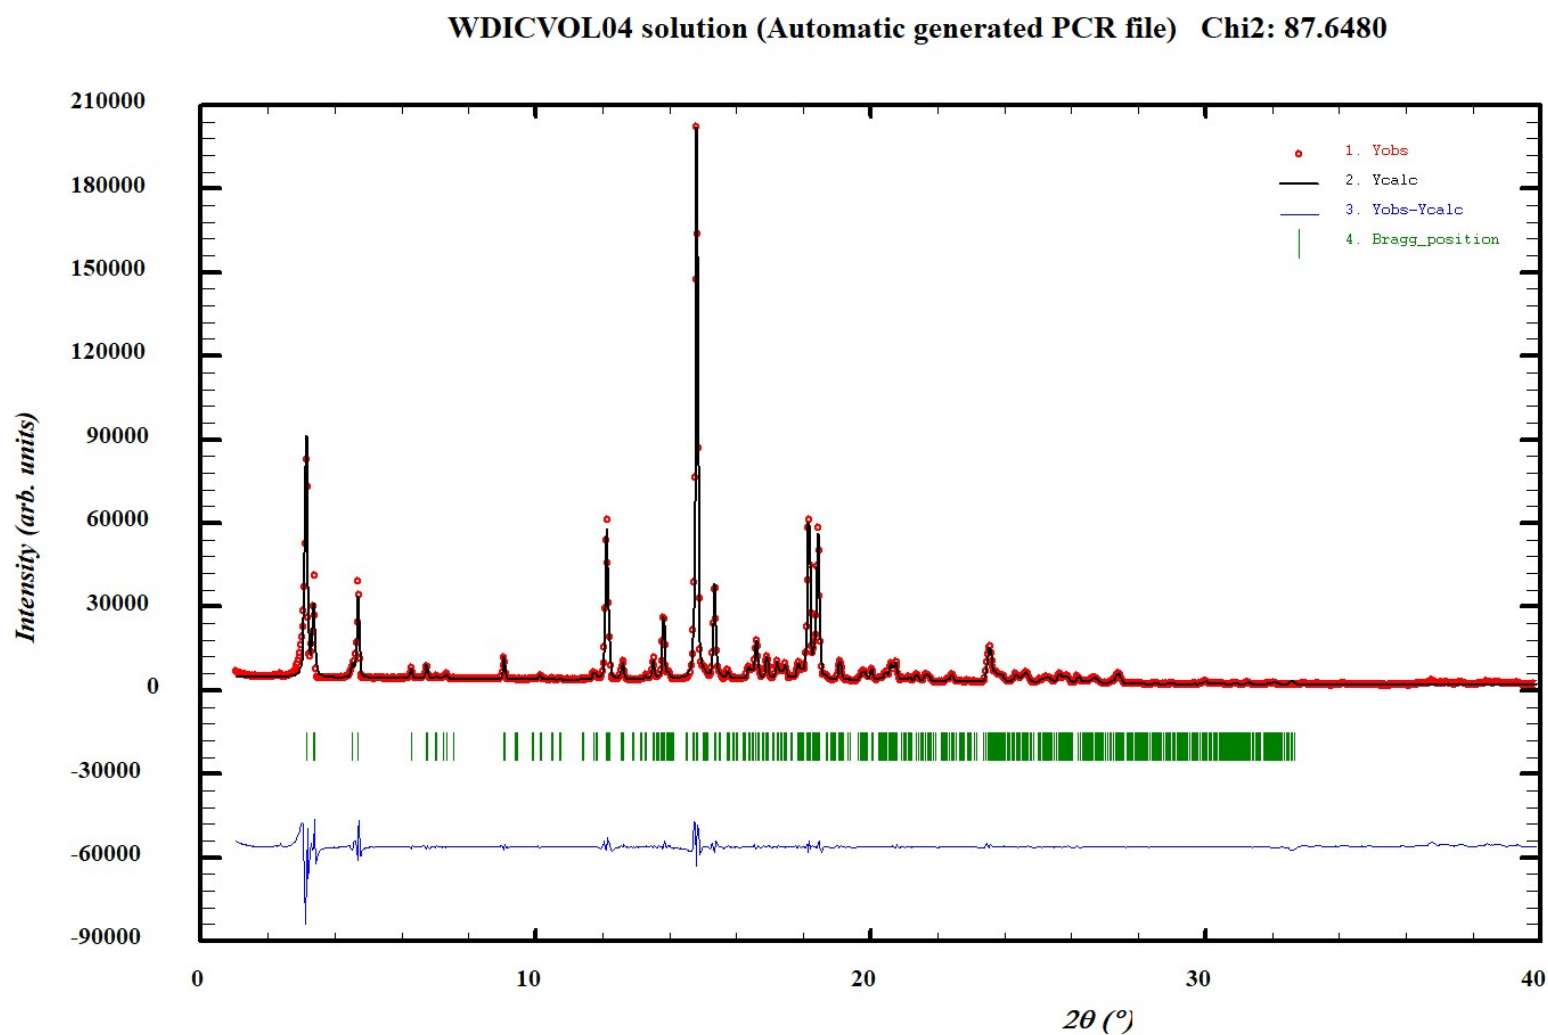

**Figure S18:** The structure was provisionally determined by single crystal X-ray diffraction at 100K showing a molar ratio 4:1:1 of the cocrystal  $\beta$ -Sitosterol:propionic acid:water, with the following monoclinic cell:  $a=26.373(3)$  Å,  $b=7.4971(7)$  Å,  $c=27.183(3)$  Å,  $\beta=92.569(6)^\circ$ ,  $V=5369(1)$  Å<sup>3</sup>,  $Z=2$ , and  $P2_1$  space group. ( $R_{\text{int}}$  (%) = 50.74; R-Factor (%) = 10.1). Comparative PXRD diffractograms between bulk SIT-ProA-H<sub>2</sub>O II cocrystal and simulated from the cif is shown.

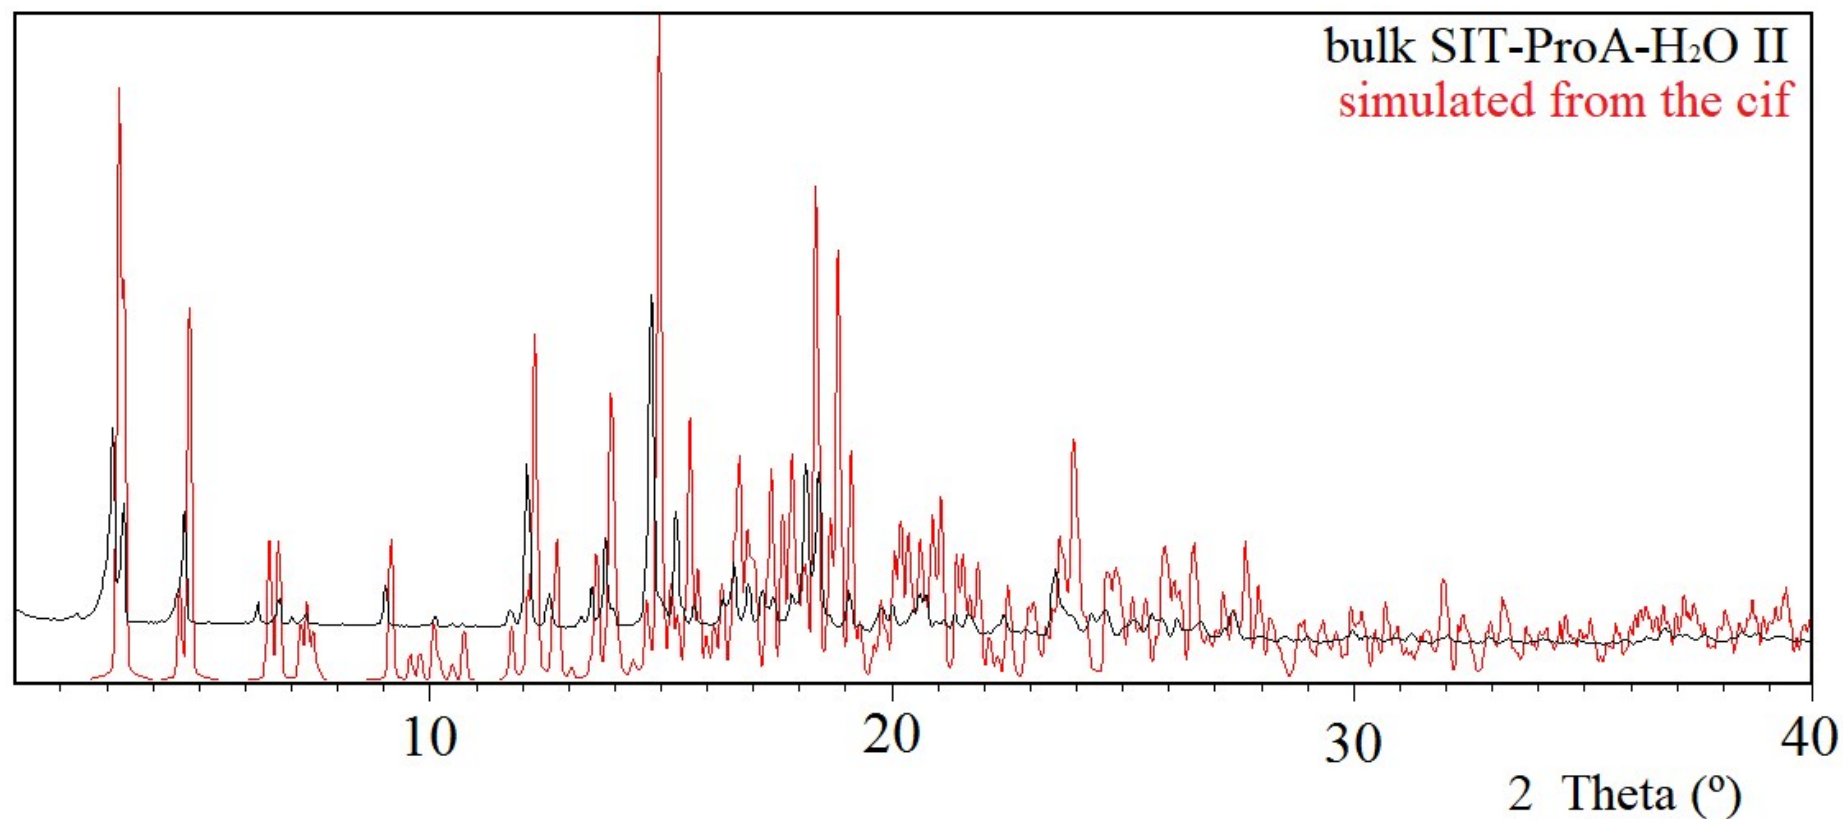

**Figure S19:  $^1\text{H}$ -NMR (chloroform- $d$ : delay: 1/pulse: 45°/scans: 32) of SIT-ProA- $\text{H}_2\text{O}$  II cocrystal**

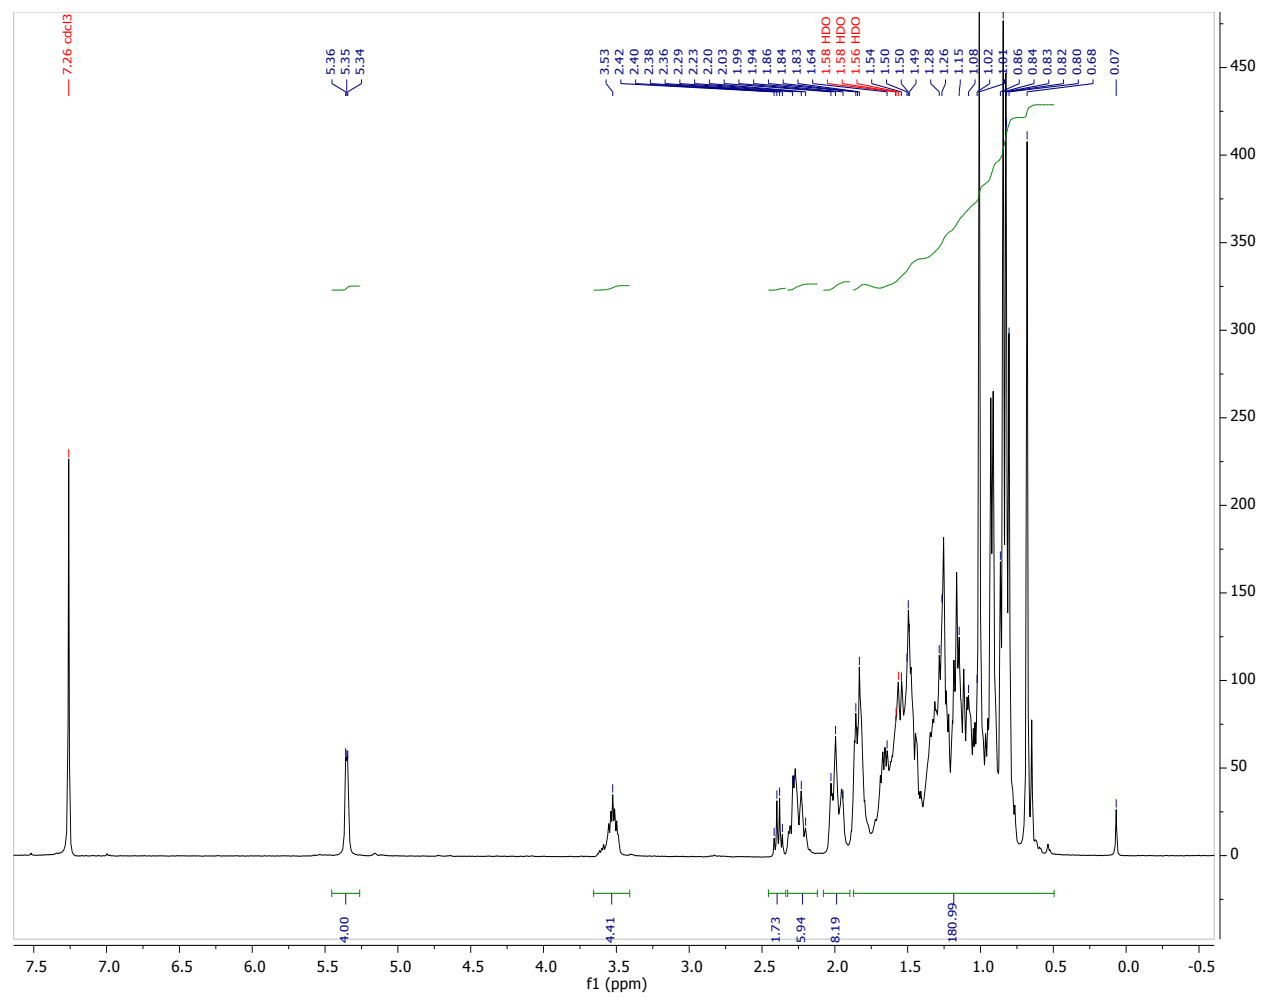

**Figure S20:** The structure was provisionally determined by single crystal X-ray diffraction at 100K showing a molar ratio 4:1:1 of the cocrystal  $\beta$ -Sitosterol:propionic acid:ACN, with the following triclinic cell:  $a=36.972(10)$  Å,  $b=9.702(3)$  Å,  $c=7.581(2)$  Å,  $\alpha=82.96(2)$ ,  $\beta=86.112(5)^\circ$ ,  $\gamma=89.740(5)$ ,  $V=2693(1)$  Å<sup>3</sup>,  $Z=1$ , and  $P1$  space group. (R-Factor (%) = 18.6). Simulated PXRD of Form SIT-ProA-ACN is shown

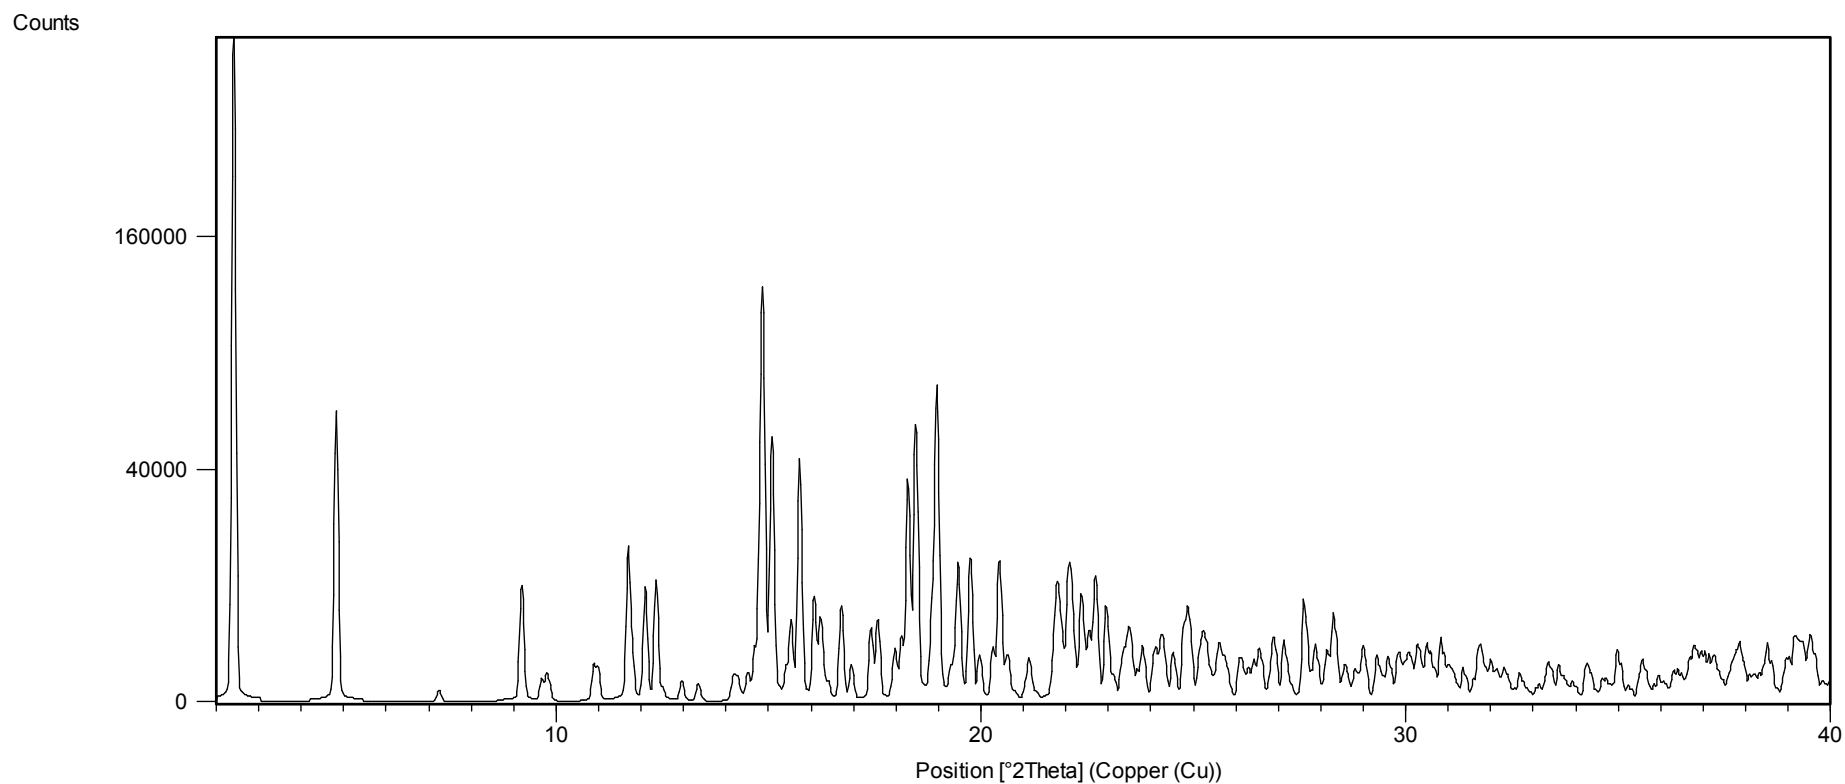

Figure S21: DSC of Form SIT-ZA-H<sub>2</sub>O

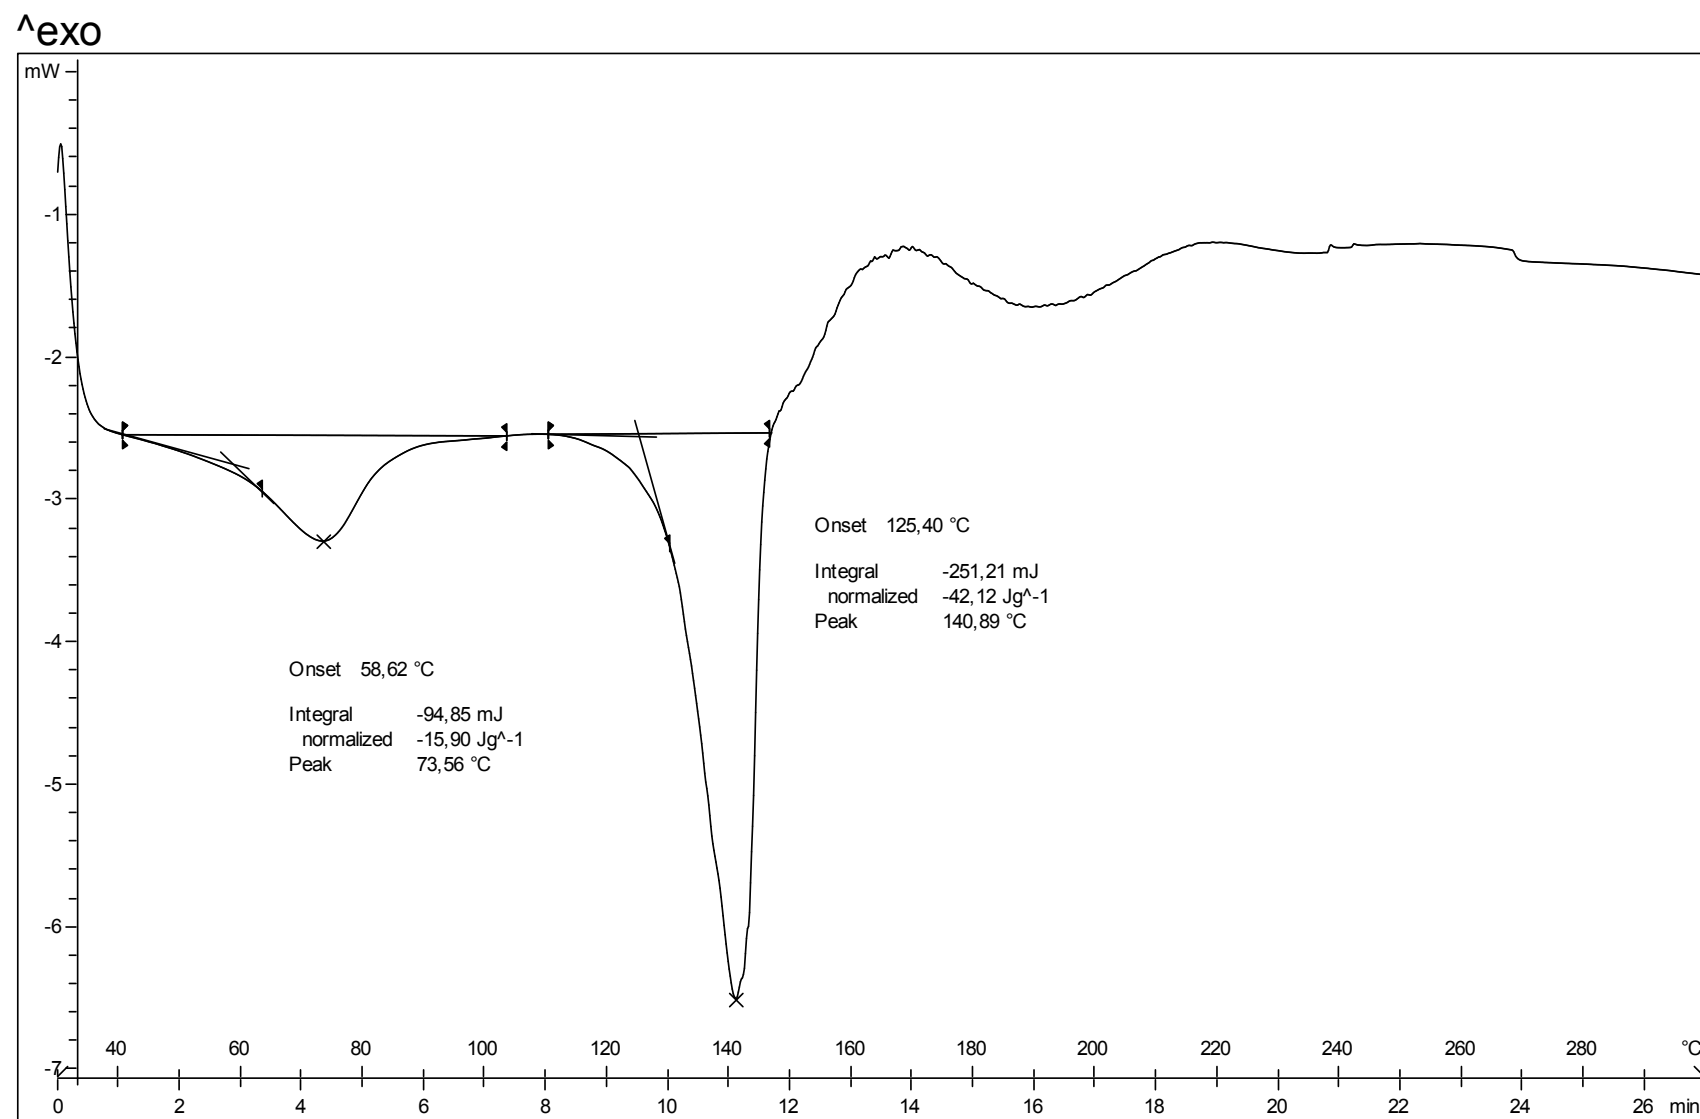



**Figure S22: TGA of Form SIT-ZA-H<sub>2</sub>O:** a weight loss of 2.4 % is detected from 30 °C to 118 °C which could be attributed to 1 molecule of water per 1 molecule of zymonic acid and 2 molecules of CSS β-Sitosterol (theoretical weight loss of 1.8%)

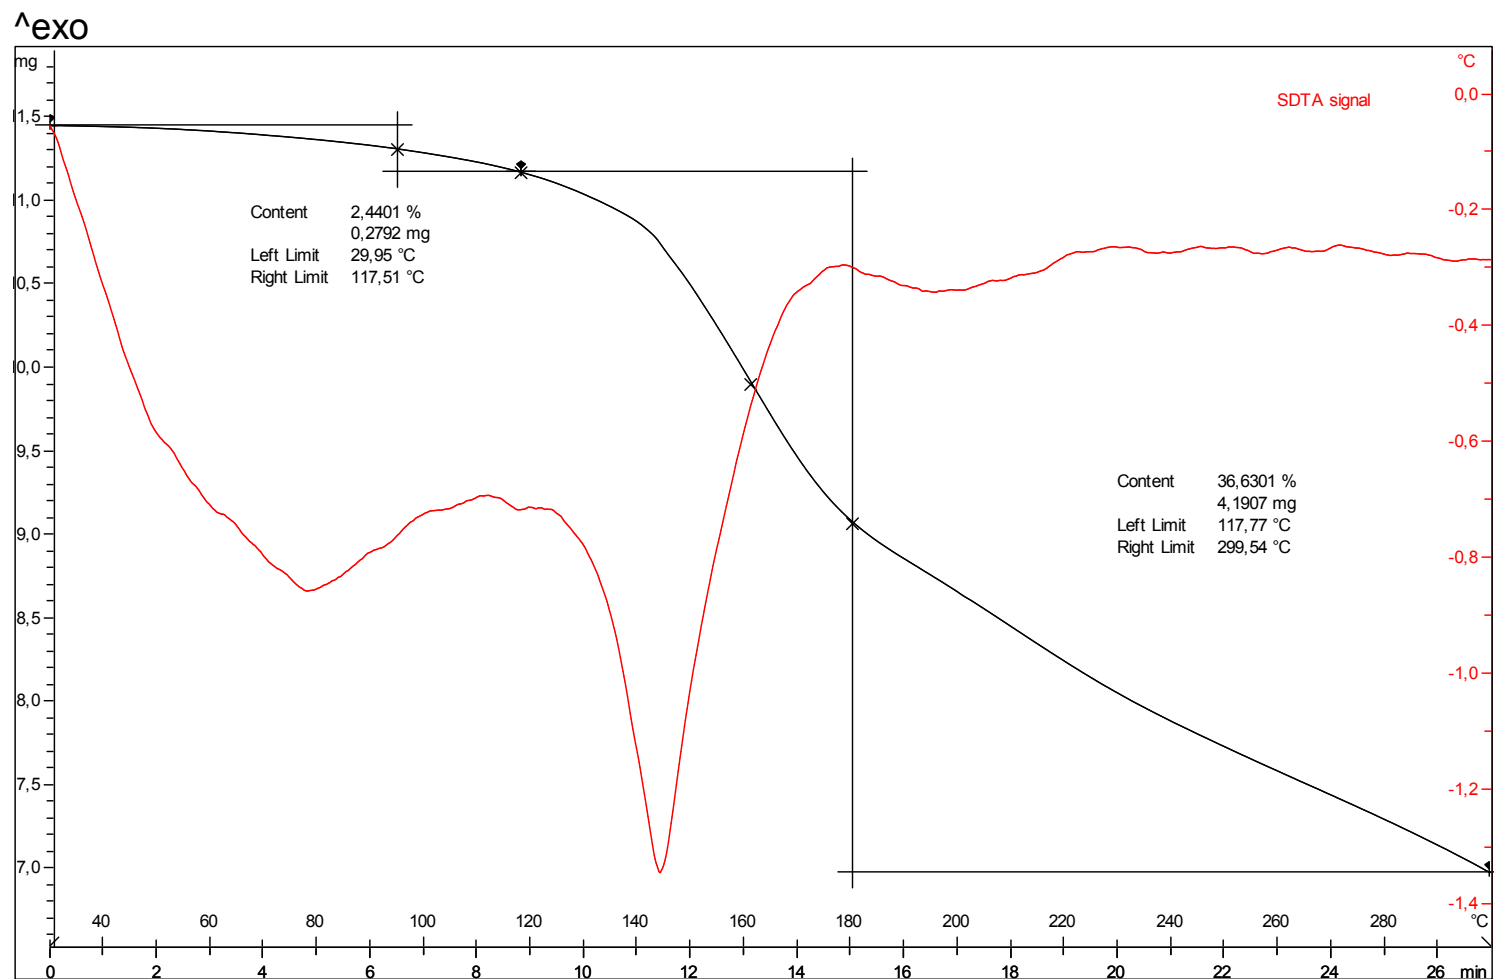

Figure S23: The XRPD of SIT-ZA-H<sub>2</sub>O cocrystal has been indexed with the following proposed monoclinic cell:  $a=39.51(2)$  Å,  $b=6.982(3)$  Å,  $c=20.126(7)$  Å,  $\beta=95.18(4)^\circ$ ,  $V=5528(4)$  Å<sup>3</sup> (Figures of Merit:  $M=10$ ,  $F=35$ ), with number of impurities equal to zero. A  $P2_1$  space group is compatible with the cell and the cell volume is compatible with 2 molecules of CSS  $\beta$ -Sitosterol, 1 molecule of zymonic acid and 1 molecule of water. ( $R_{wp}$ : 10.1;  $R_{exp}$ : 2.78)

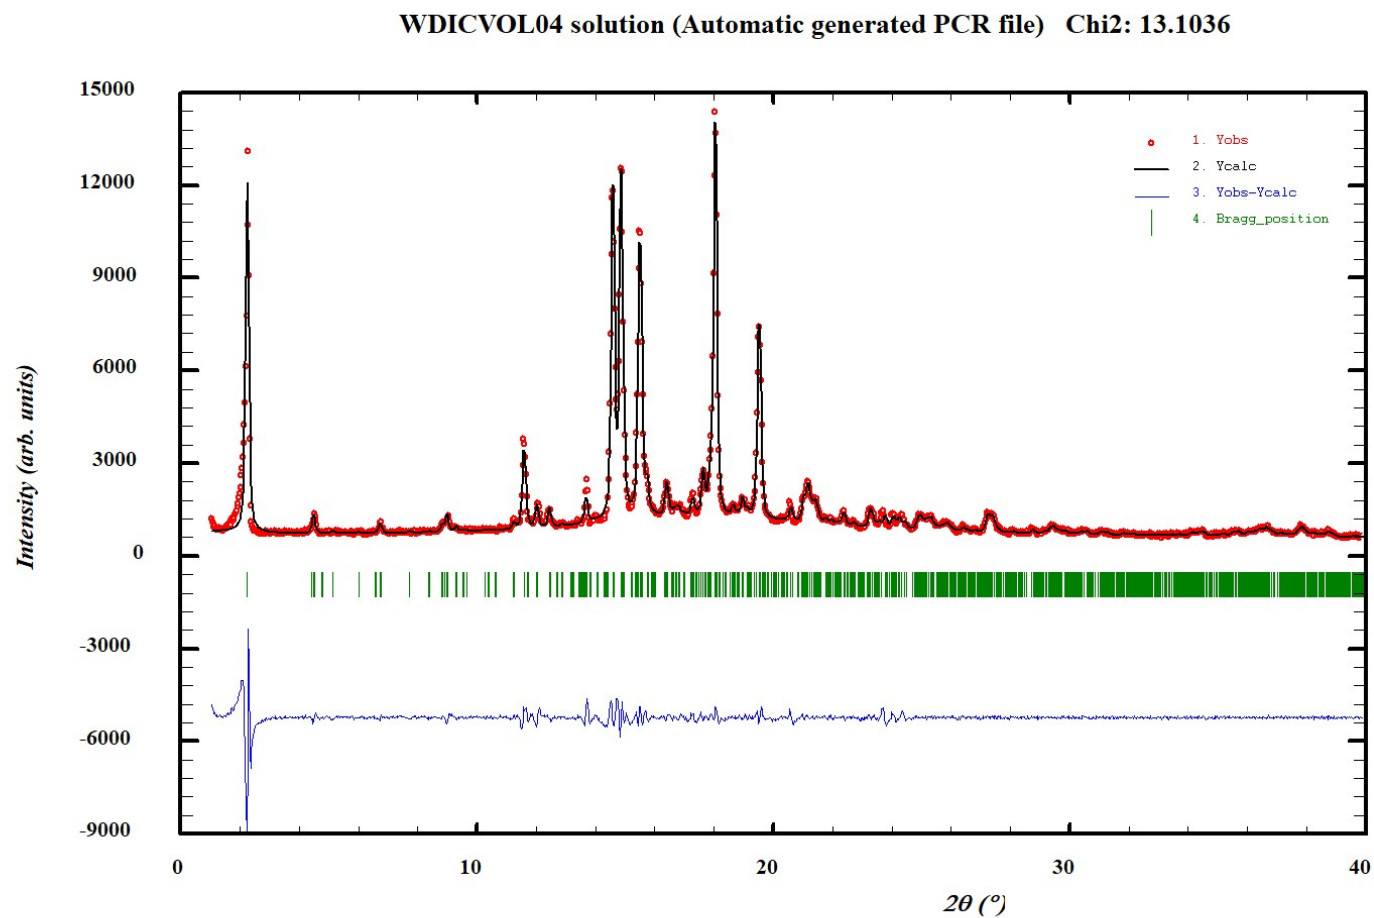

**Figure S24:** The structure was provisionally determined by single crystal X-ray diffraction at 293K showing a molar ratio 2:1:1 of the cocrystal  $\beta$ -Sitosterol:zymonic acid:water, with the following monoclinic cell:  $a=77.42(2)$  Å,  $b=7.609(2)$  Å,  $c=9.924(3)$  Å,  $\beta=90.948(7)^\circ$ ,  $V=5875(3)$  Å<sup>3</sup>,  $Z=4$ , and  $C2$  space group. (R-Factor (%) = 15.8). Comparative PXRD diffractograms between bulk SIT-ZA-H<sub>2</sub>O cocrystal and simulated from the cif is shown.

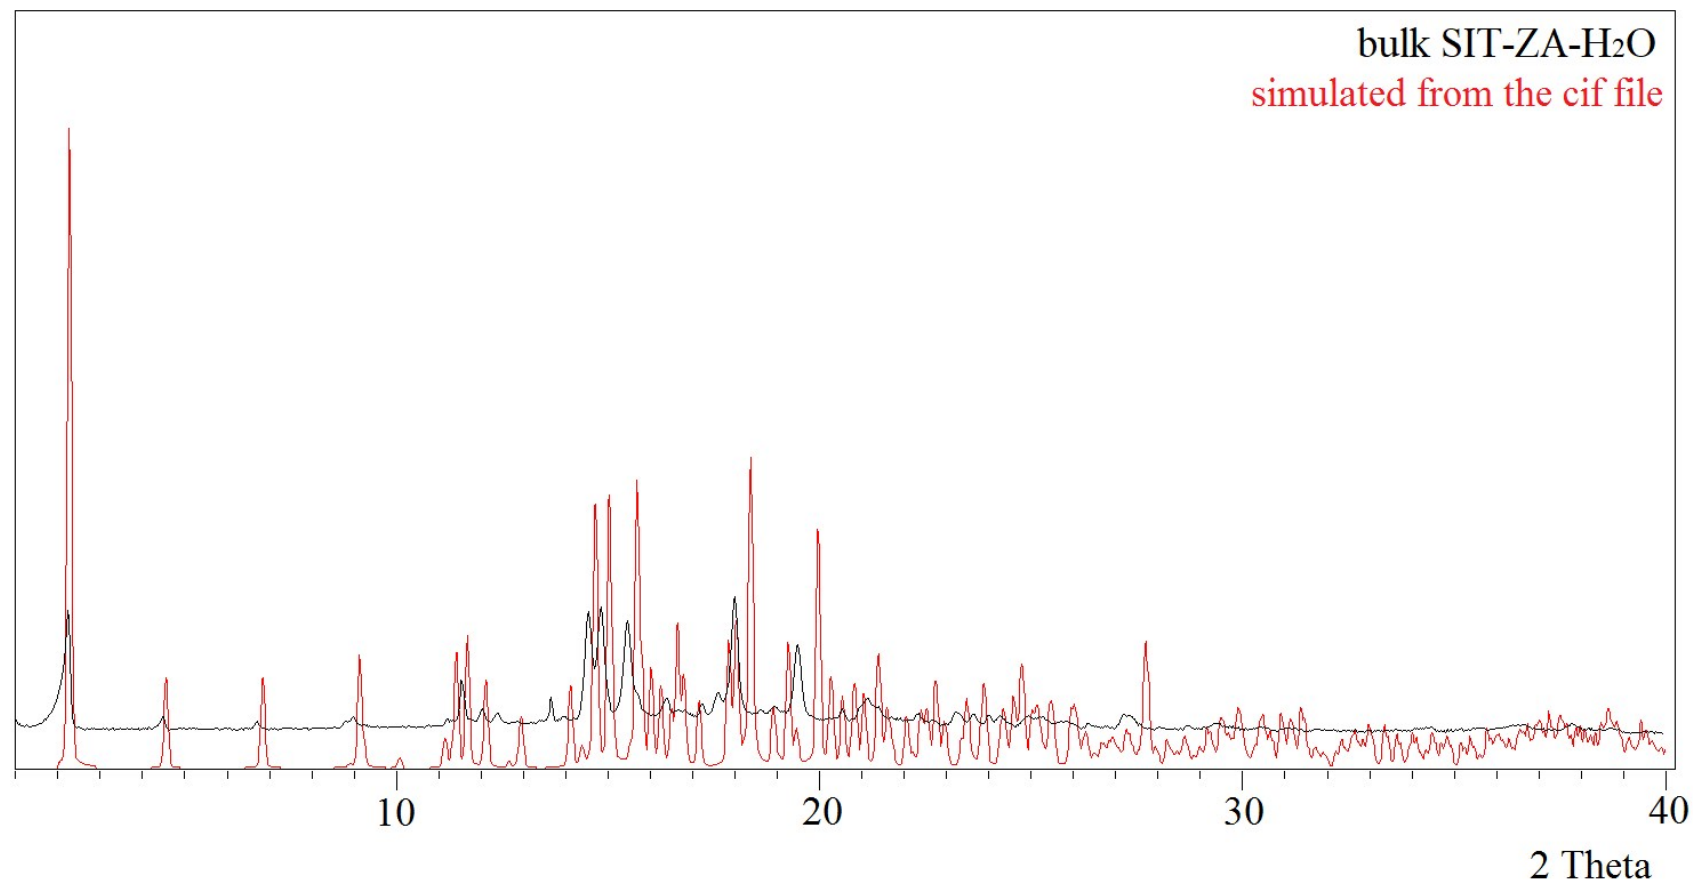

Figure S25:  $^1\text{H}$ -NMR (chloroform- $d$ /delay: 1/pulse: 45°/scans: 32) of Form SIT-ZA- $\text{H}_2\text{O}$

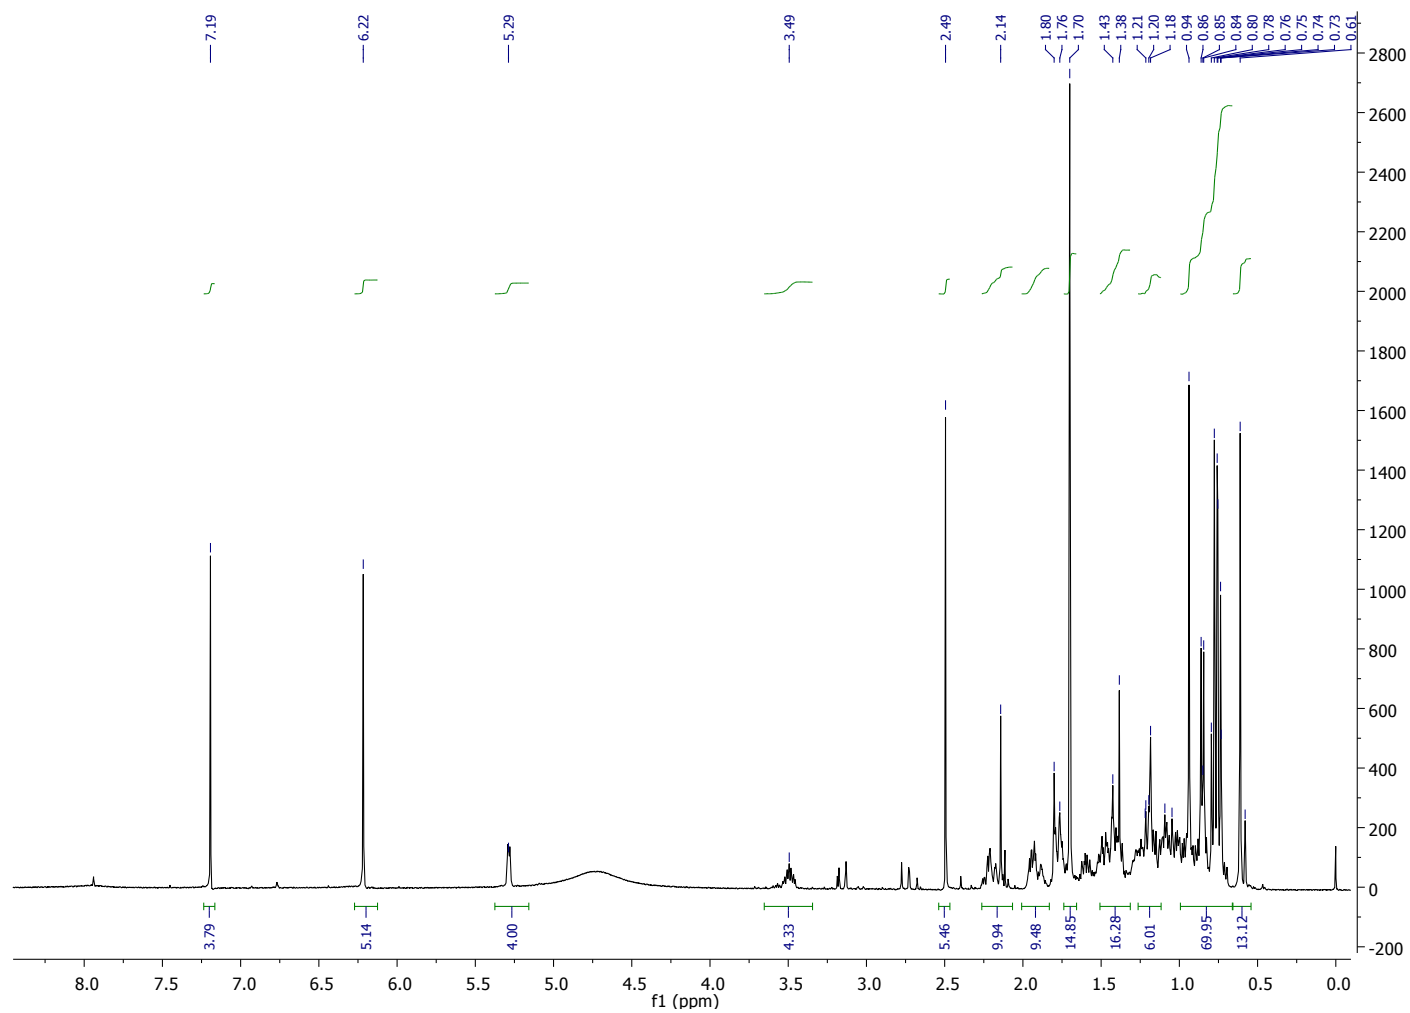

**Figure S26: DSC of Form SIT-GA**

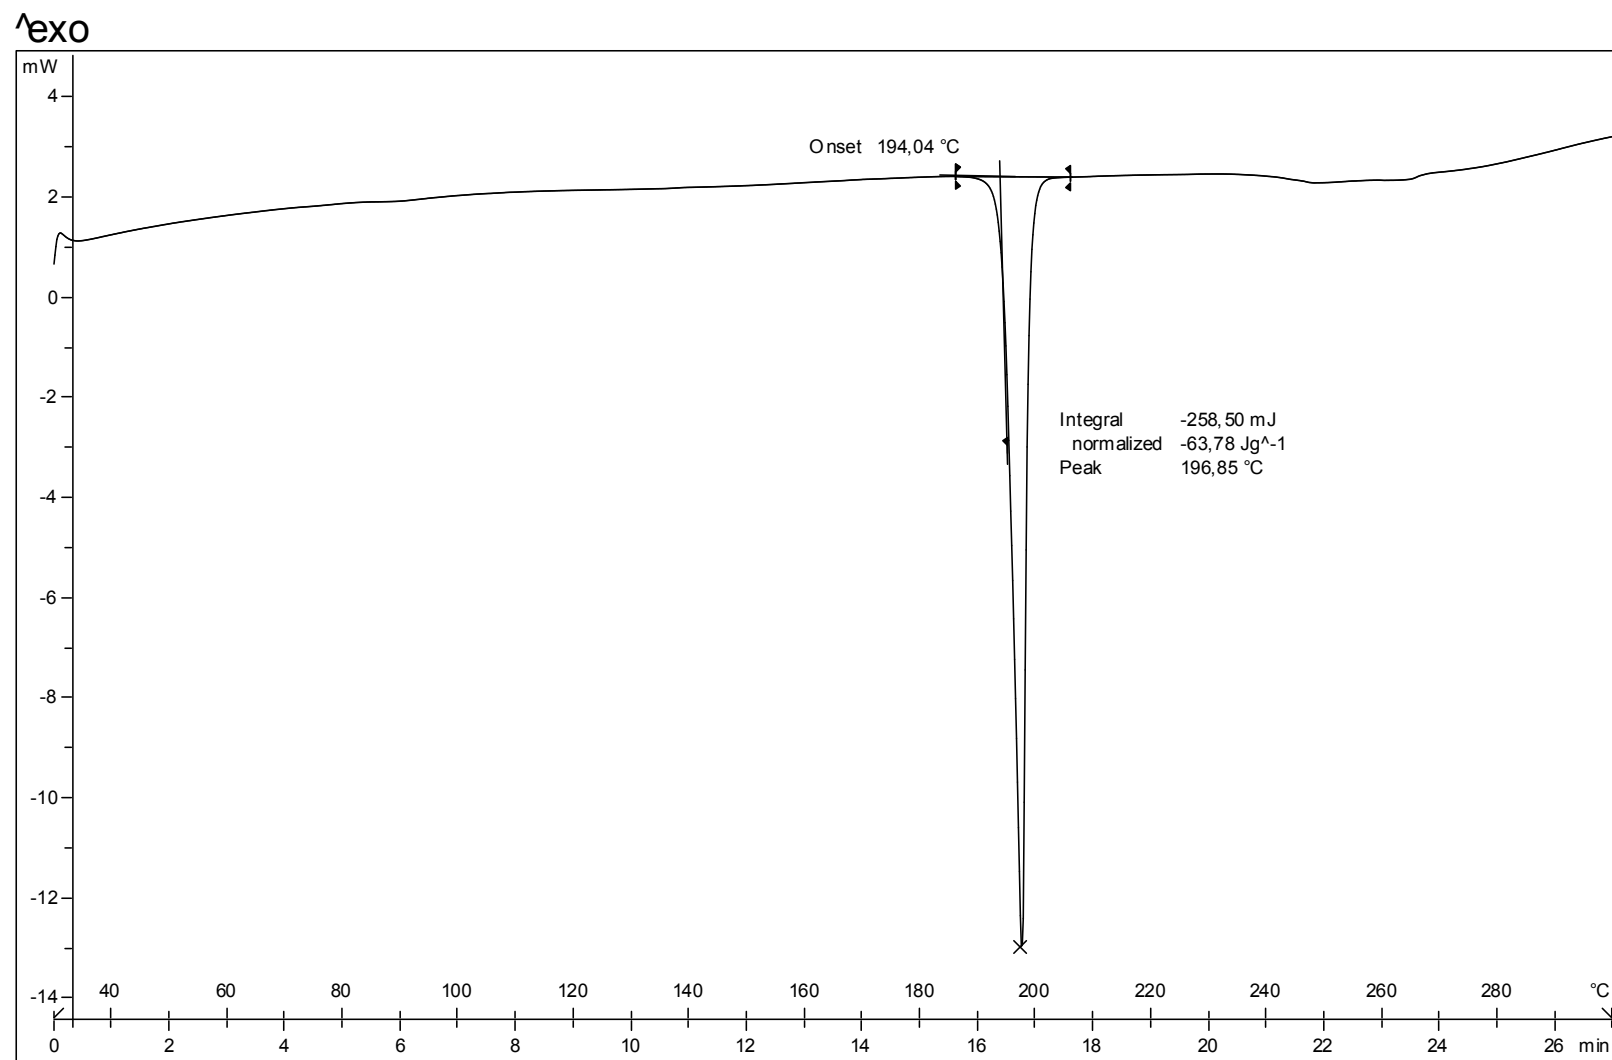

Figure S27: TGA of Form SIT-GA

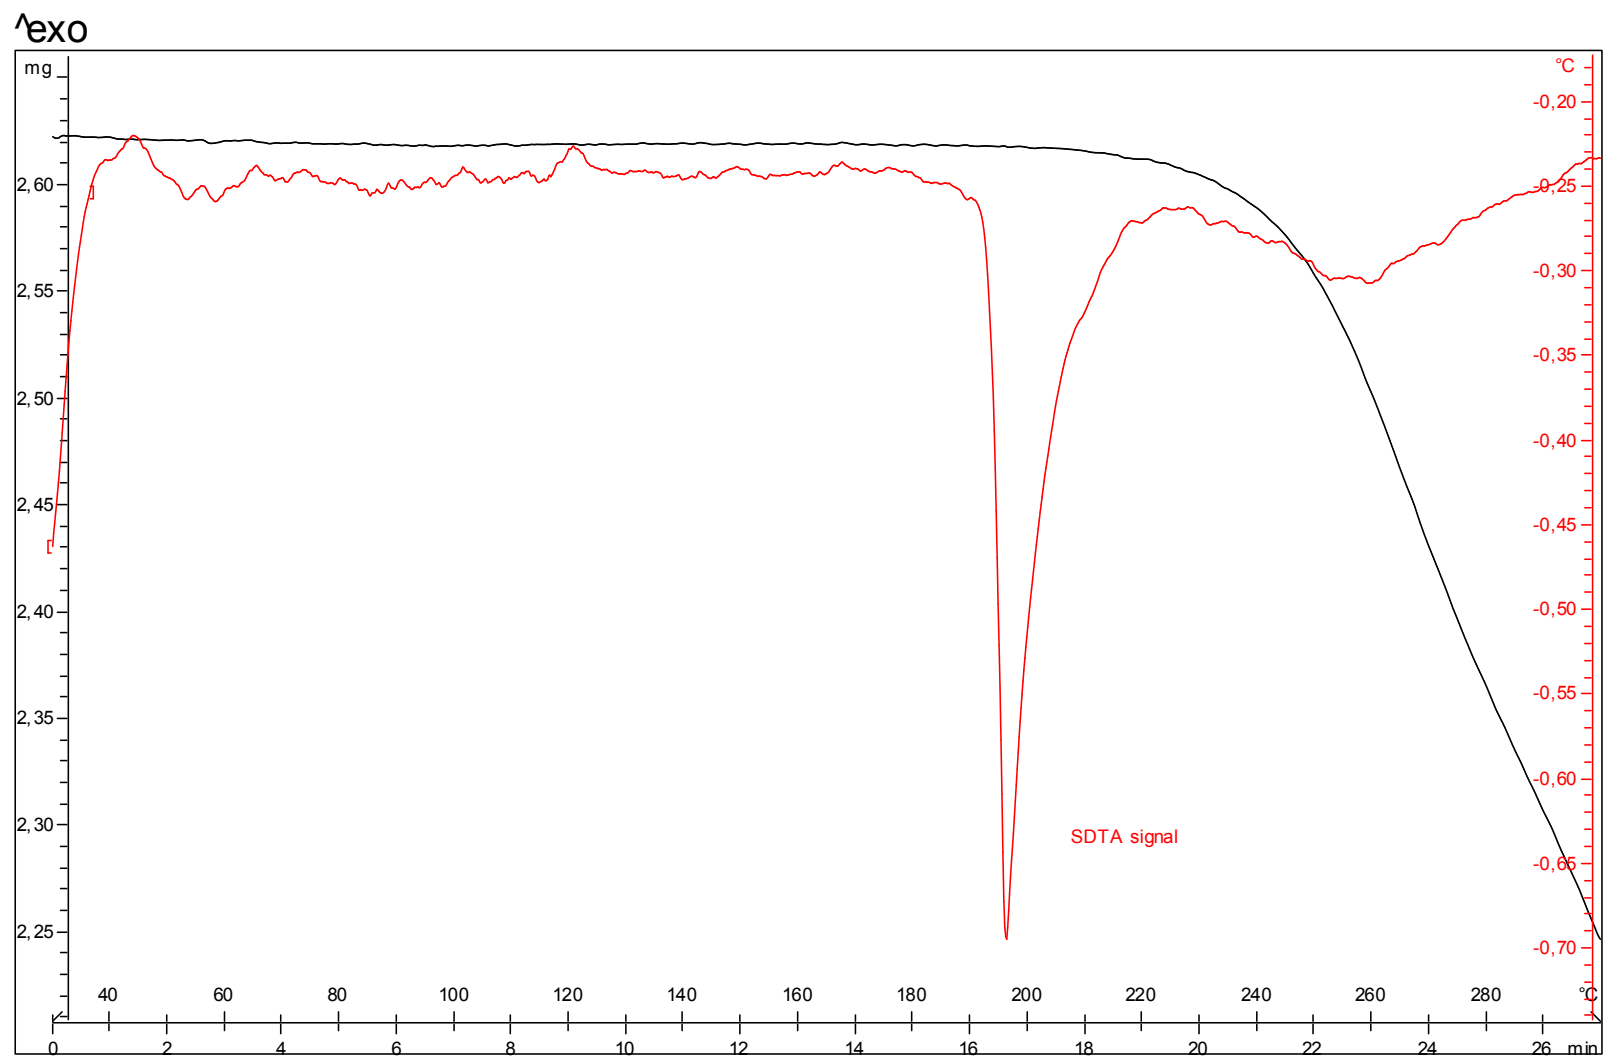

Figure S28: The XRPD of SIT-GA cocrystal has been indexed with the following proposed monoclinic cell:  $a=38.54(5)$  Å,  $b=13.812(4)$  Å,  $c=10.882(3)$  Å,  $\beta=92.33(5)^\circ$ ,  $V=5788(8)$  Å<sup>3</sup> (Figures of Merit:  $M=39$ ,  $F=135$ ), with number of impurities equal to zero. A  $P2_1$  space group is compatible with the cell and the cell volume is compatible with 4 molecules of CSS  $\beta$ -Sitosterol, 1 molecule of gallic acid and 1 molecule of water. ( $R_{wp}$ : 11.1;  $R_{exp}$ : 2.05)

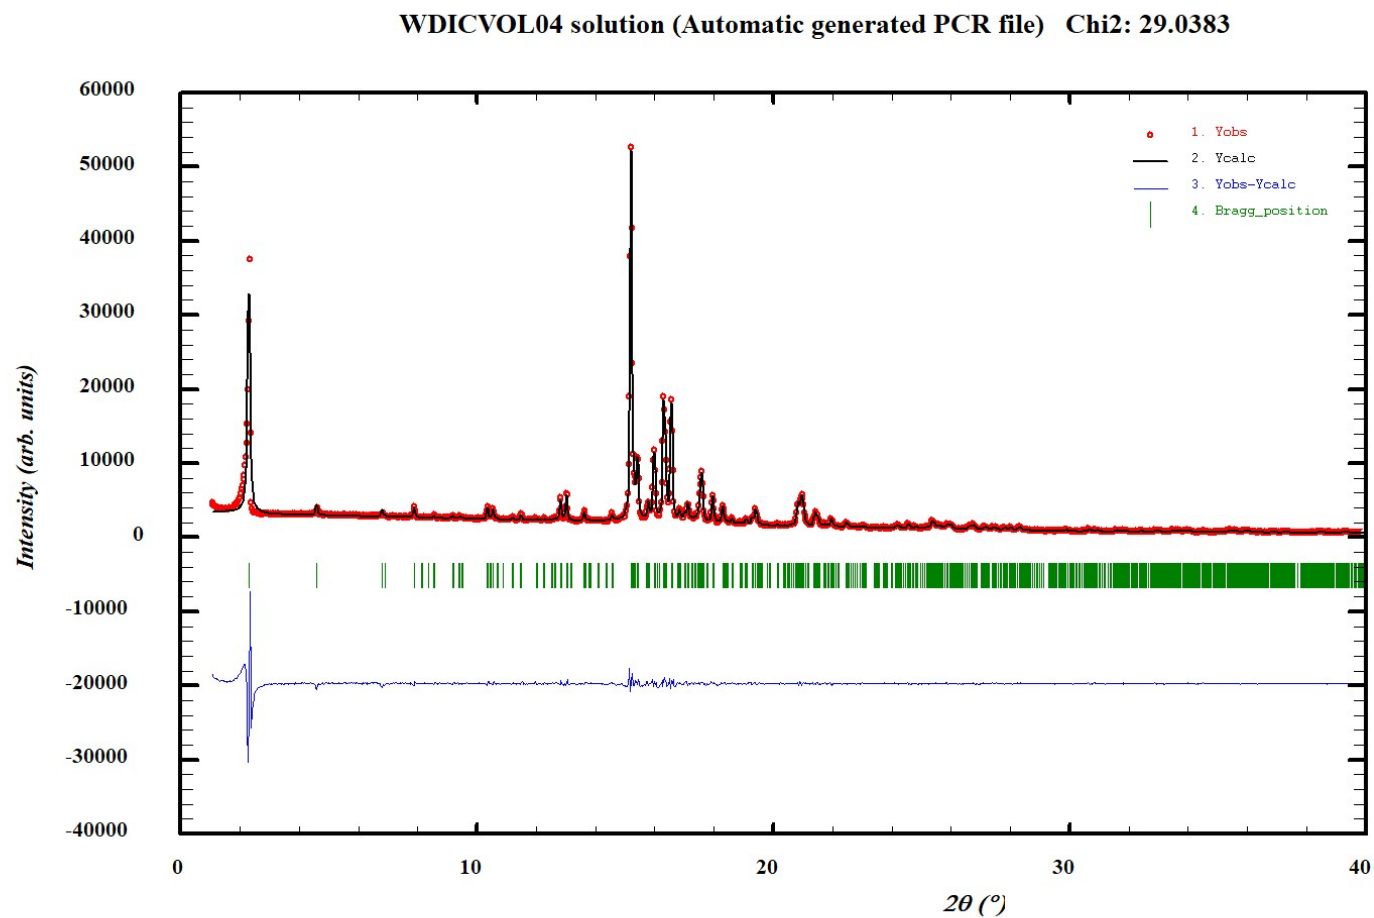

**Figure S29:** The structure was provisionally determined by single crystal X-ray diffraction at 100K showing a molar ratio 4:1 of the cocrystal  $\beta$ -Sitosterol:gallic acid, with the following monoclinic cell:  $a=38.123(2)$  Å,  $b=13.699(6)$  Å,  $c=10.744(5)$  Å,  $\beta=93.002(2)^\circ$ ,  $V=5603(1)$  Å<sup>3</sup>,  $Z=2$ , and  $P2_1$  space group. (R-Factor (%) = 13.2). Comparative PXRD diffractograms between bulk SIT-GA cocrystal and simulated from the cif is shown.

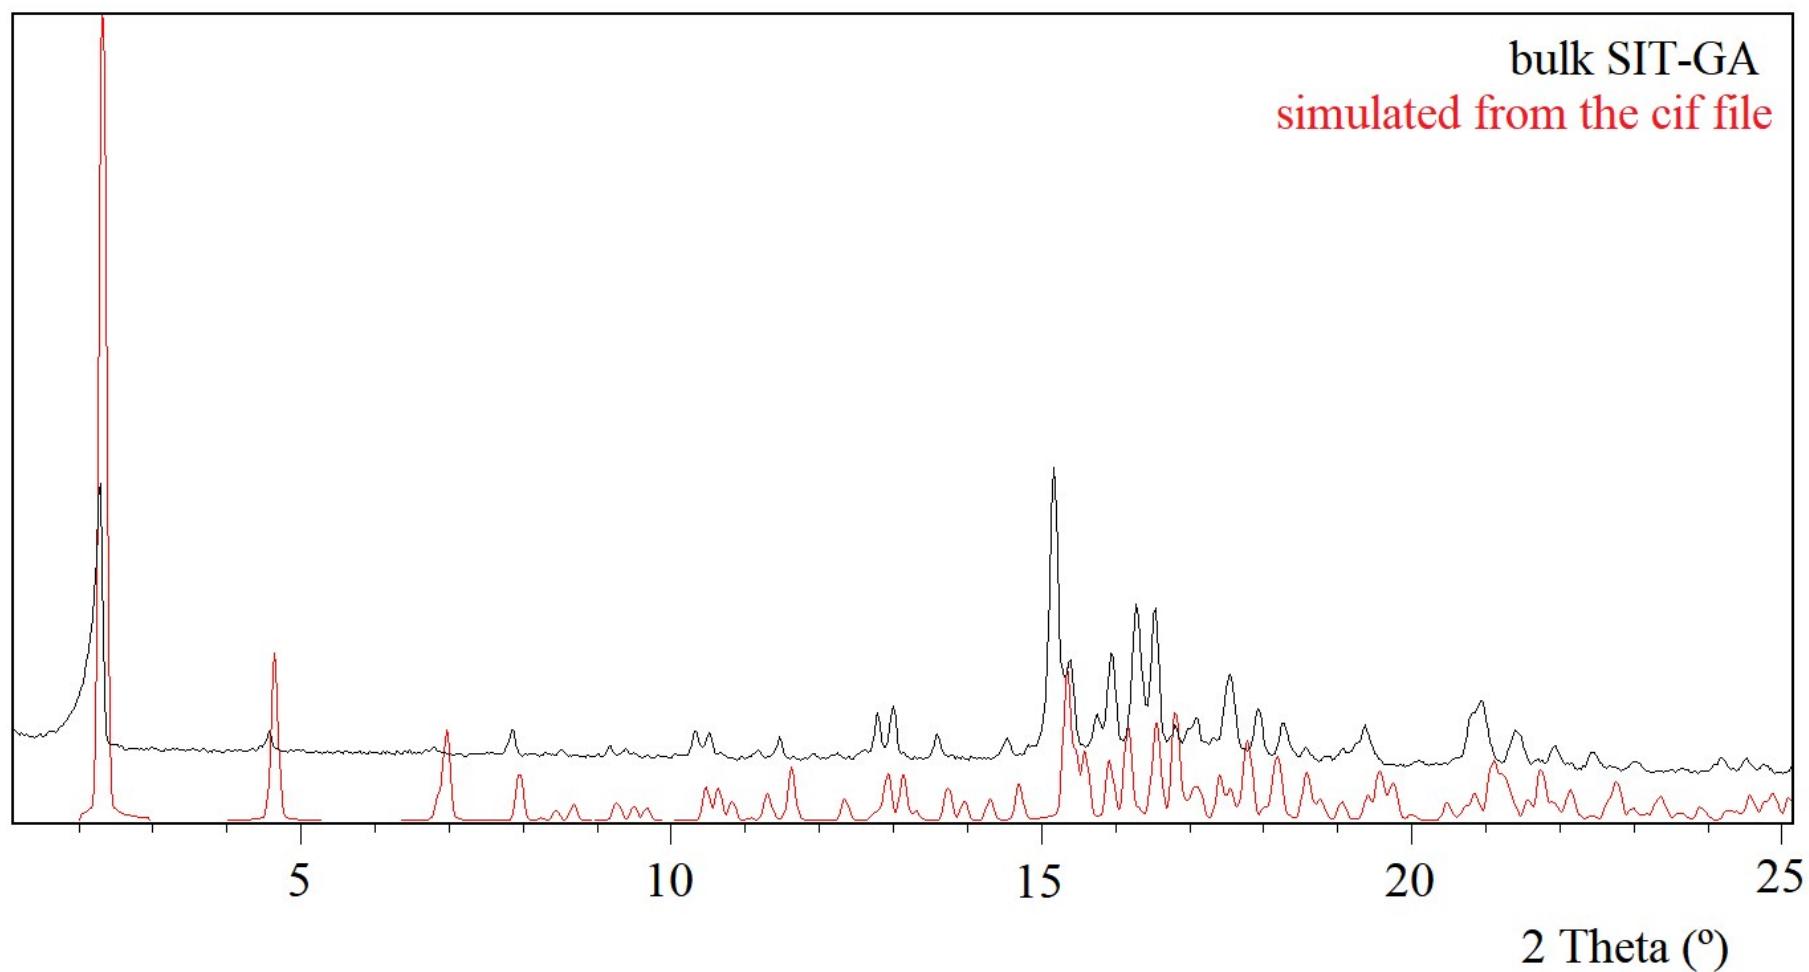



Figure S30:  $^1\text{H}$ -NMR (chloroform- $d$ /delay: 1/pulse: 45°/scans: 32) of Form SIT-GA

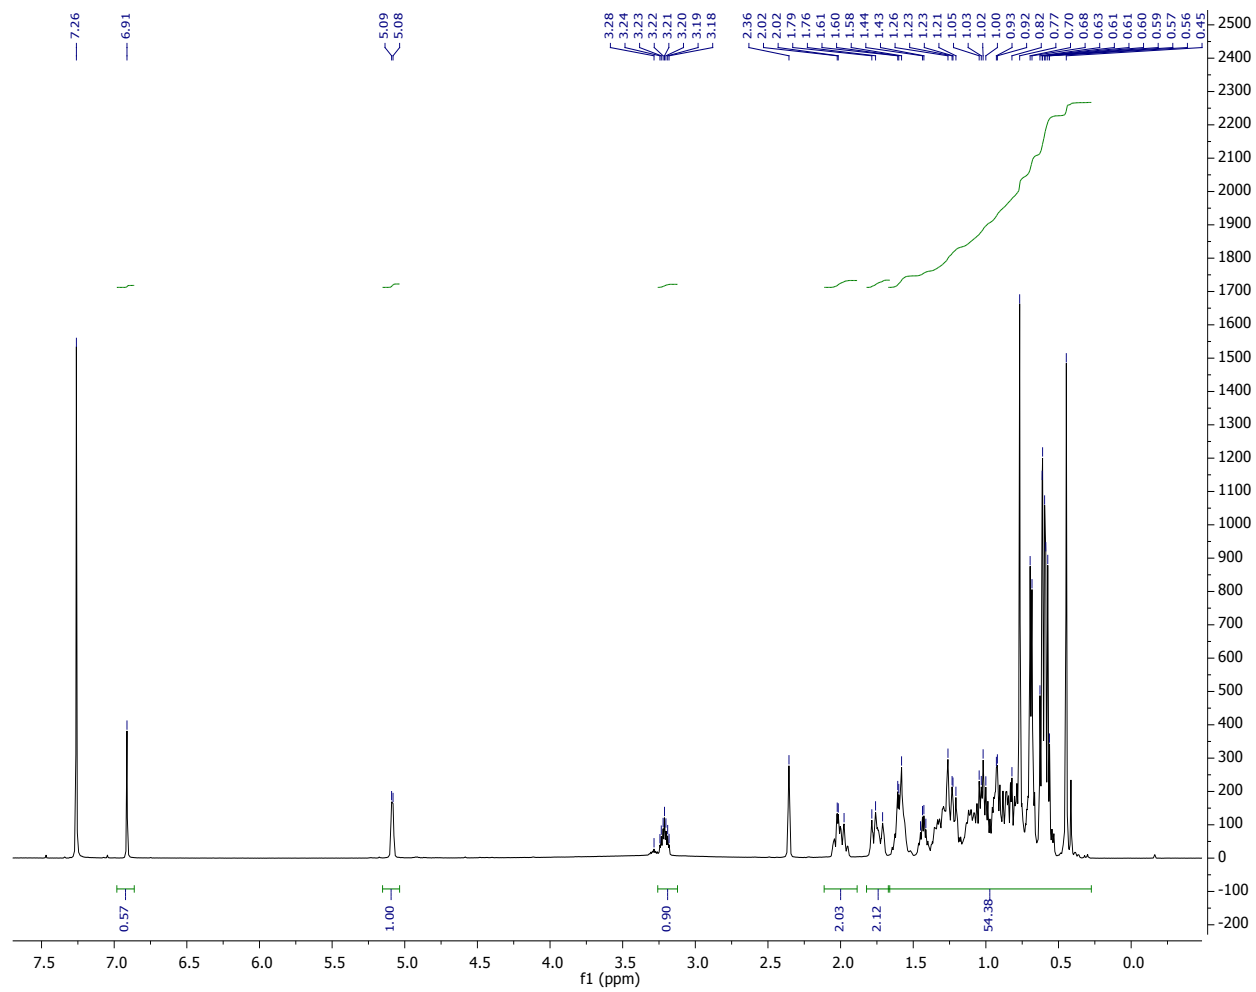

**Figure S31: DSC of Form SIT-4-HBA I**

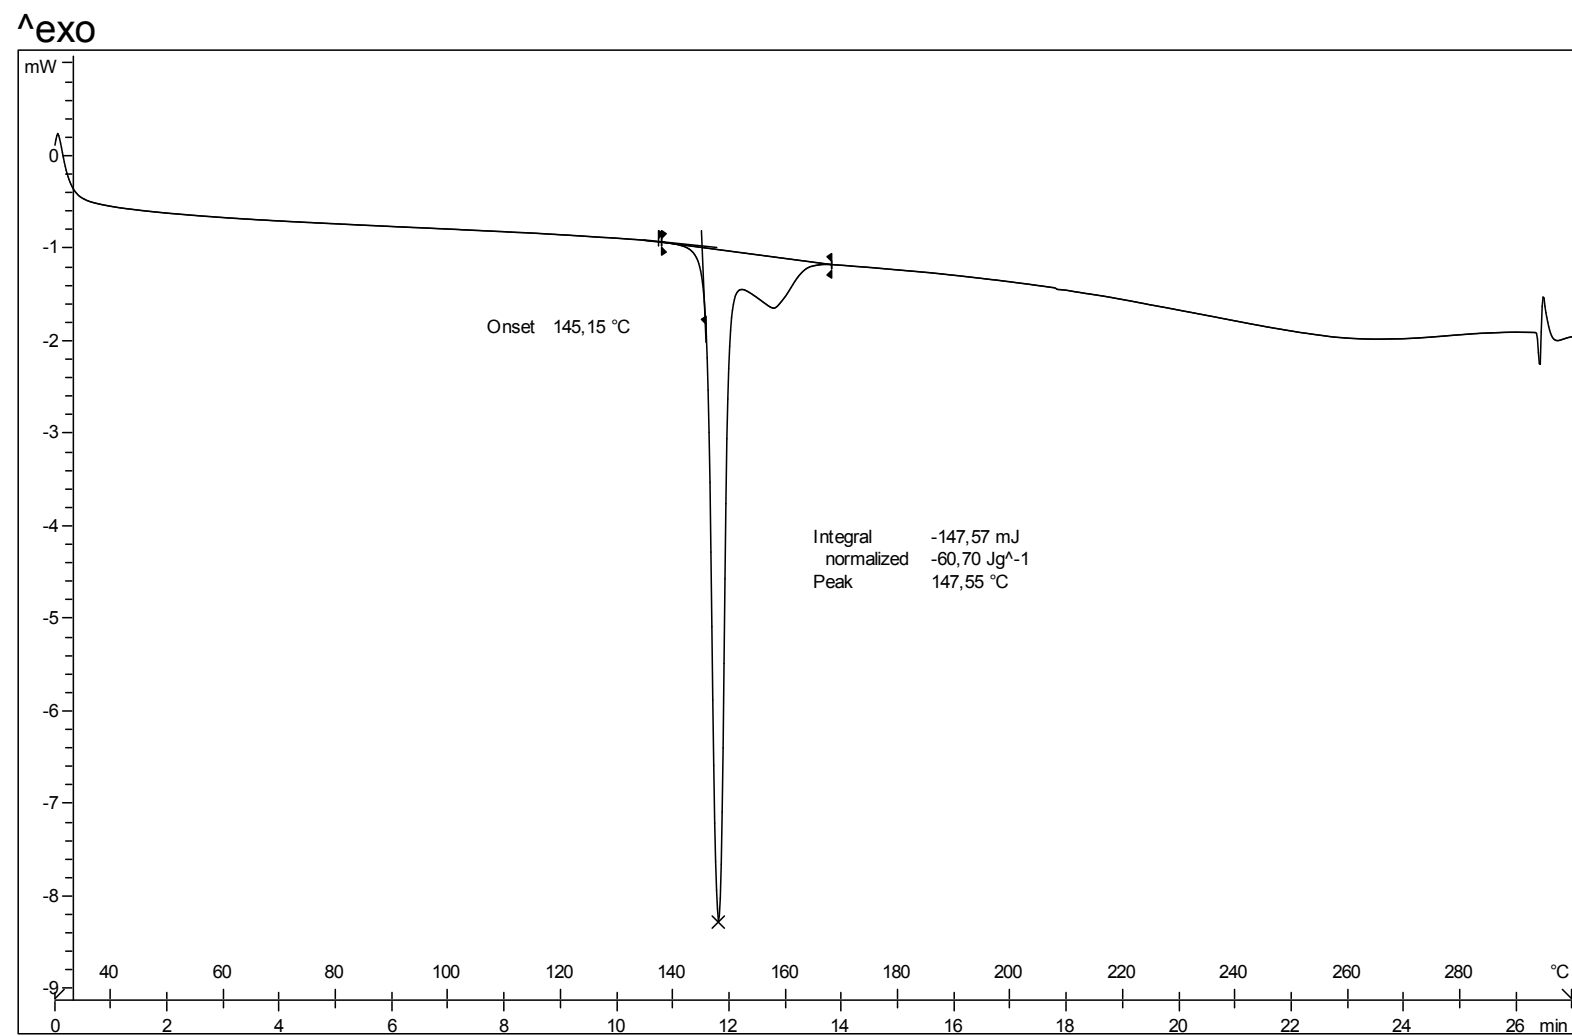

Figure S32: TGA of Form SIT-4-HBA I

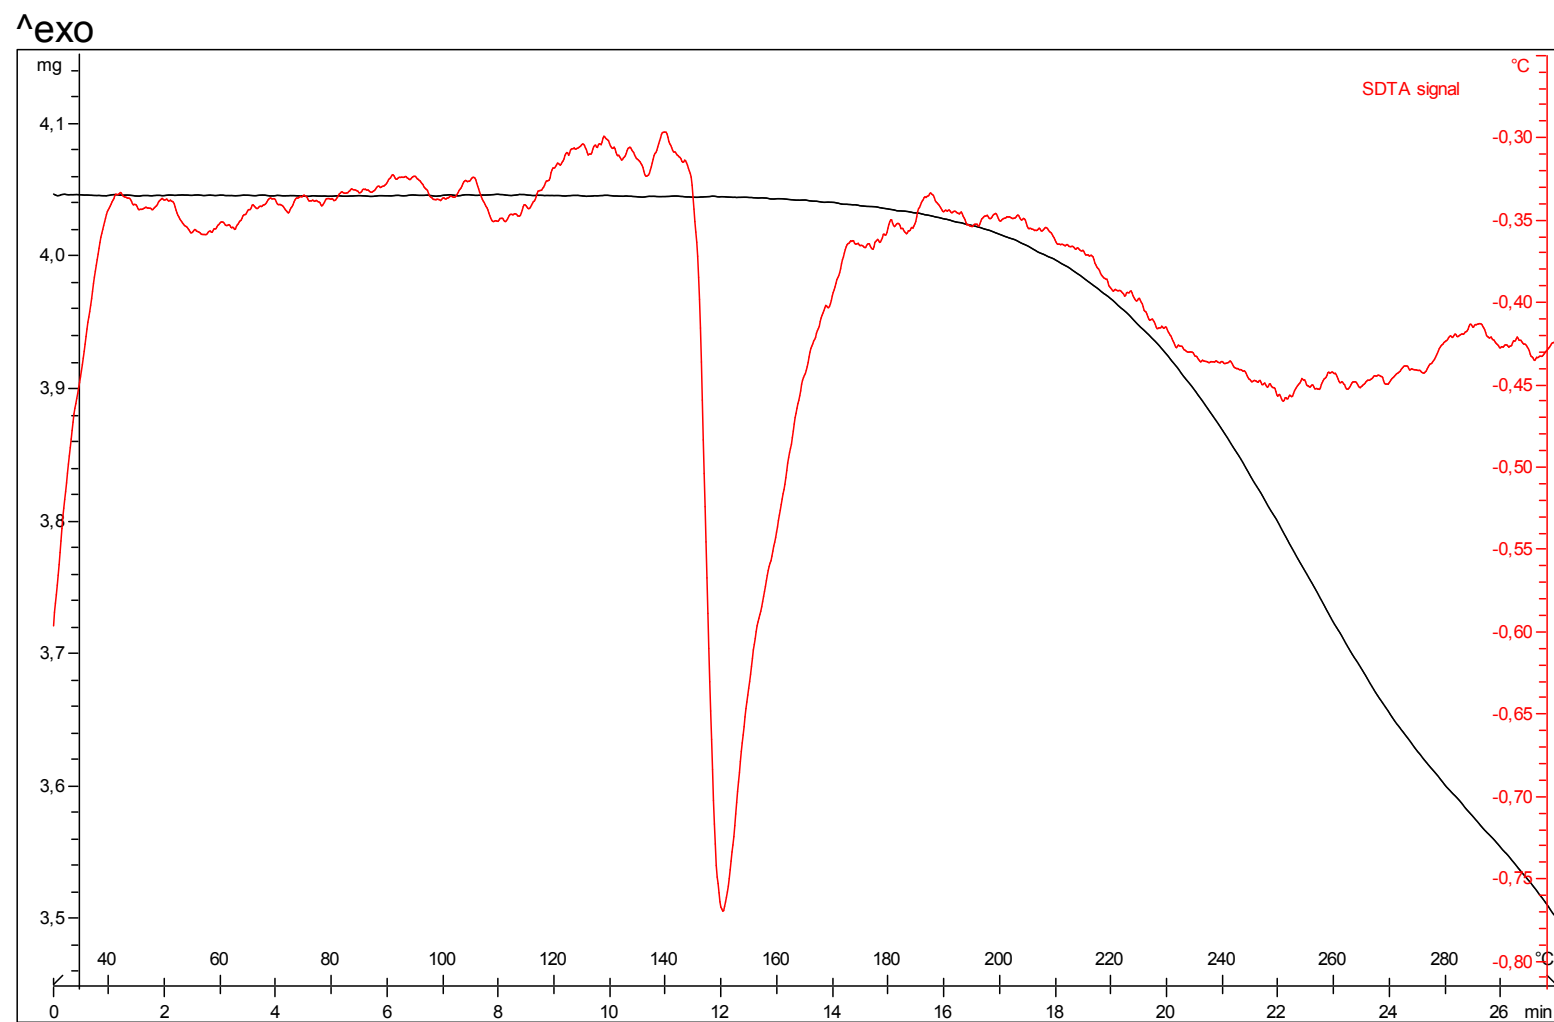

Figure S33: The XRPD of SIT-4-HBA I cocrystal has been indexed with the following proposed monoclinic cell:  $a=38.16(5)$  Å,  $b=14.196(6)$  Å,  $c=10.539(4)$  Å,  $\beta=92.0(1)^\circ$ ,  $V=5711(8)$  Å<sup>3</sup> (Figures of Merit:  $M=18$ ,  $F=70$ ), with number of impurities equal to zero. A  $P2_1$  space group is compatible with the cell and the cell volume is compatible with 1 molecule of CSS  $\beta$ -Sitosterol and 1 molecule of 4-HBA. ( $R_{wp}$ : 21.3;  $R_{exp}$ : 1.61)

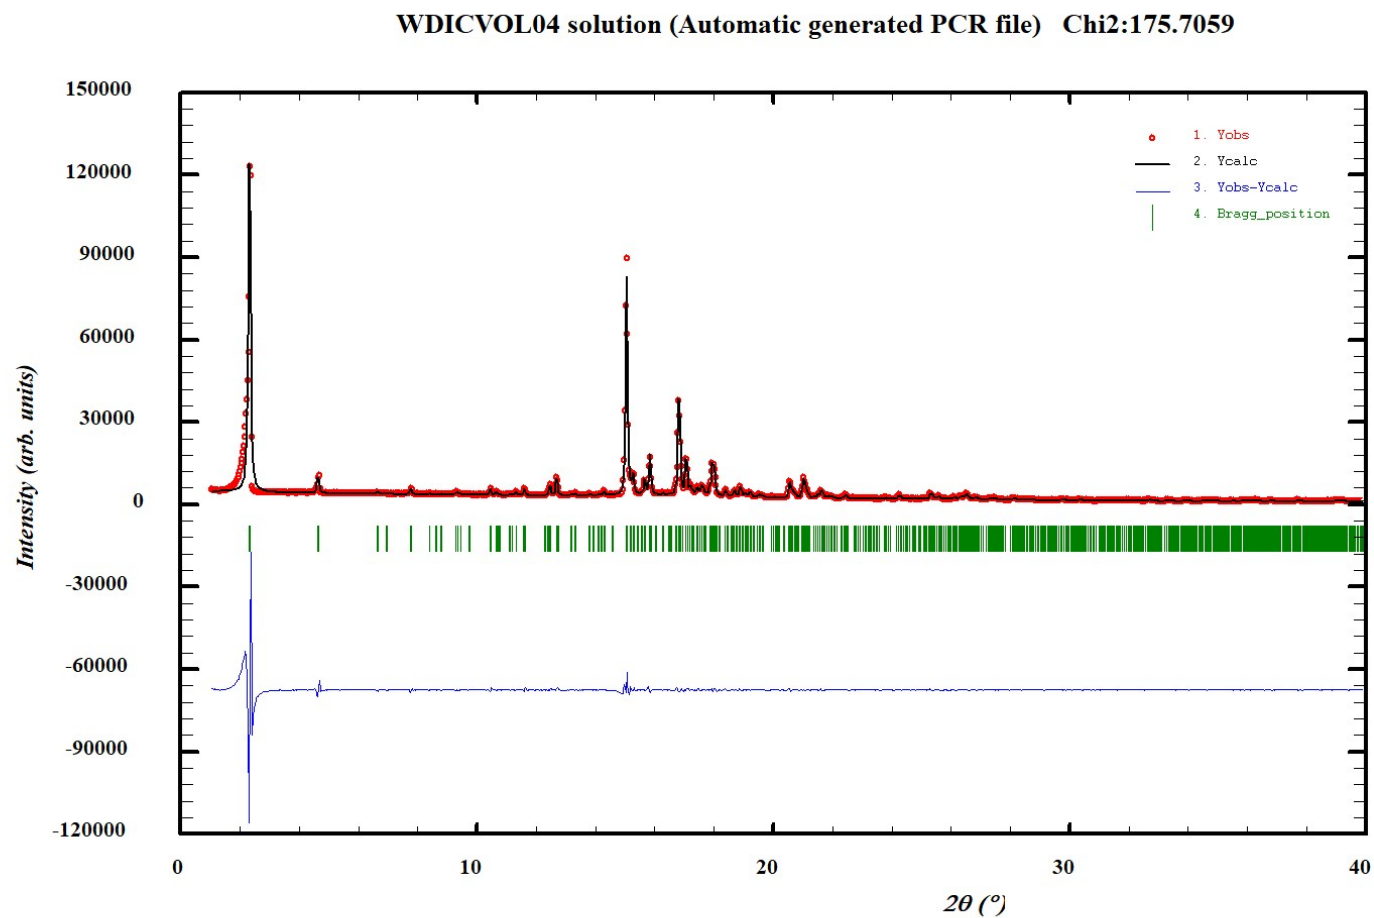

Figure S34:  $^1\text{H}$ -NMR (dmso- $d_6$ /delay: 1/pulse: 45°/scans: 32) of Form SIT-4-HBA I

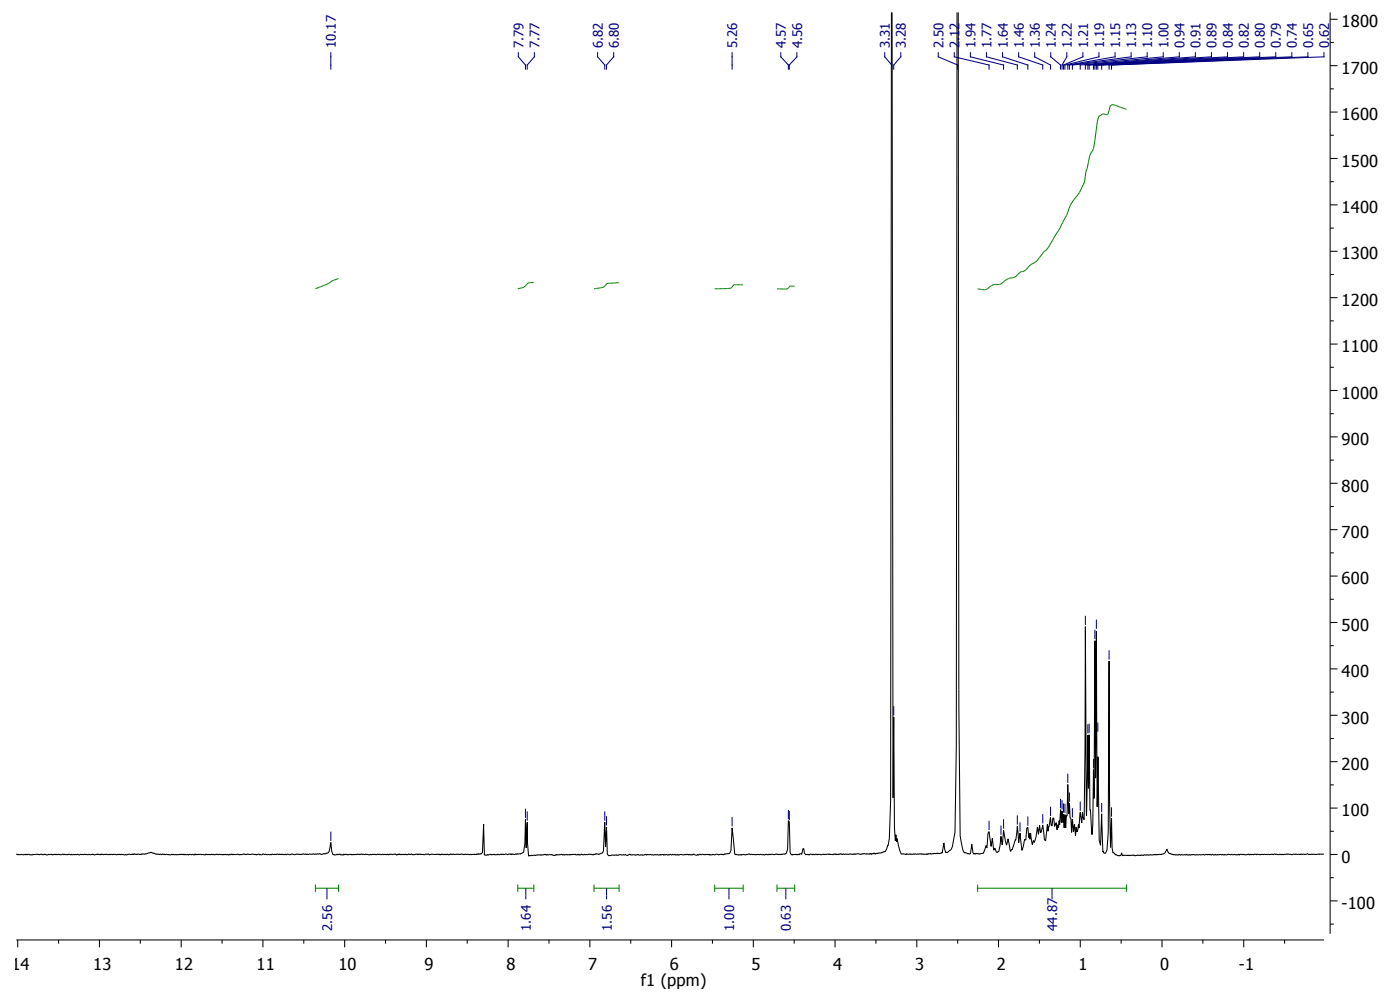

**Figure S35: DSC of Form SIT-4-HBA-H<sub>2</sub>O II**

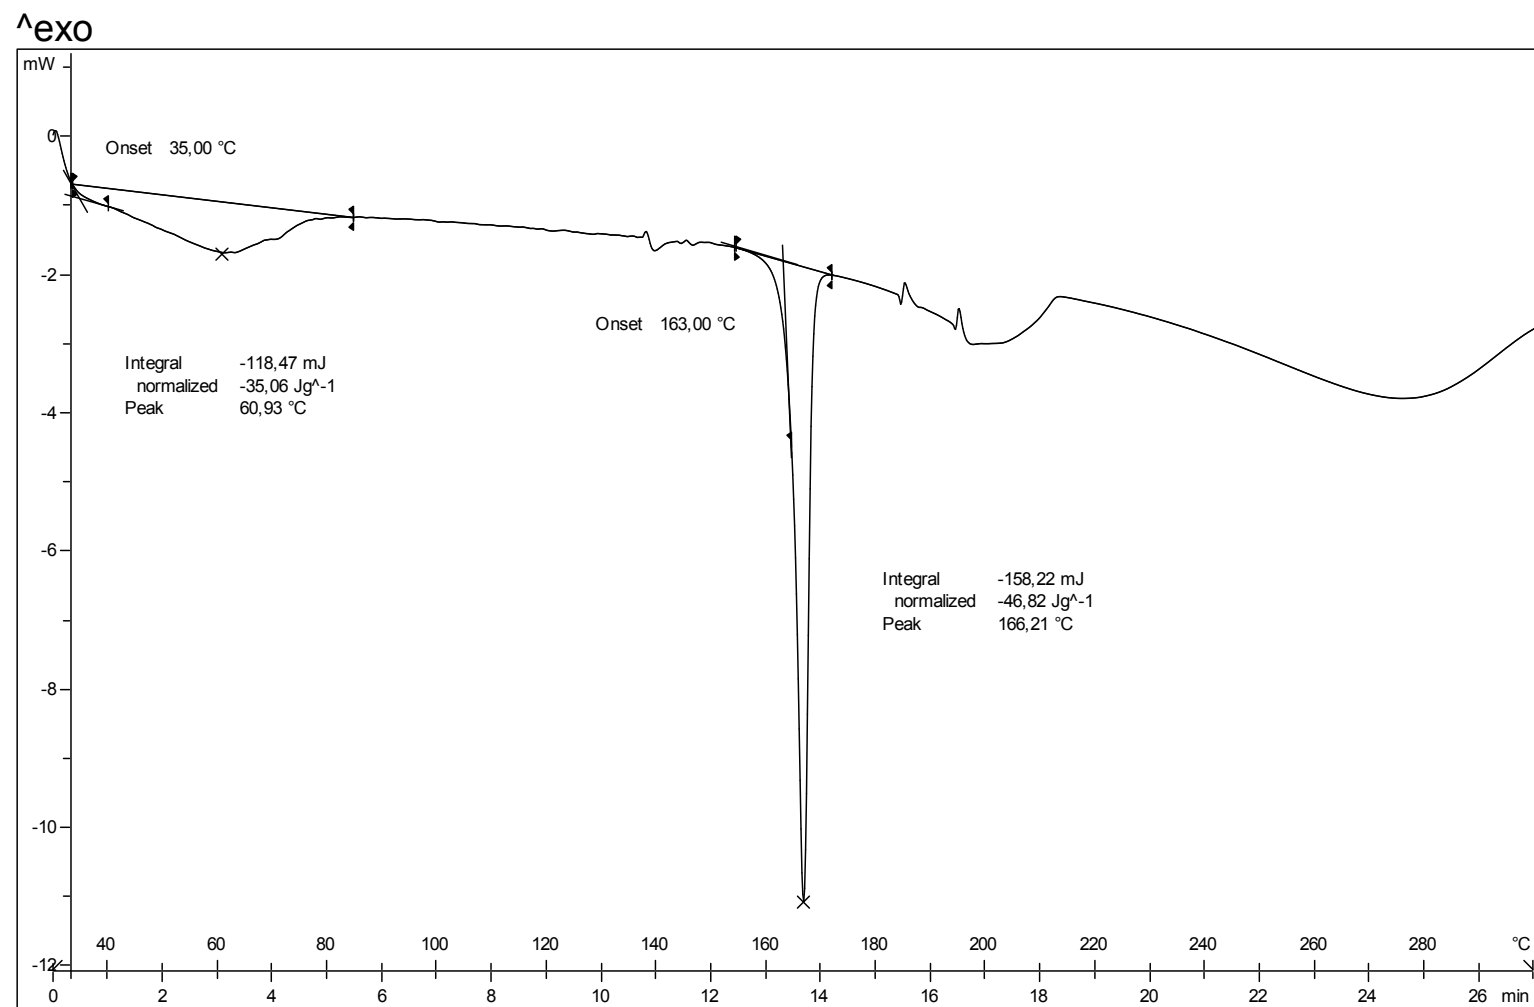

**Figure S36: TGA of Form SIT-4-HBA-H<sub>2</sub>O II:** a weight loss of 1.3 % is detected from 29 °C to 86 °C which could be attributed to ½ molecule of water per 1 molecule of 4-HBA and 1 molecule of CSS β-Sitosterol (theoretical weight loss of 1.6%)

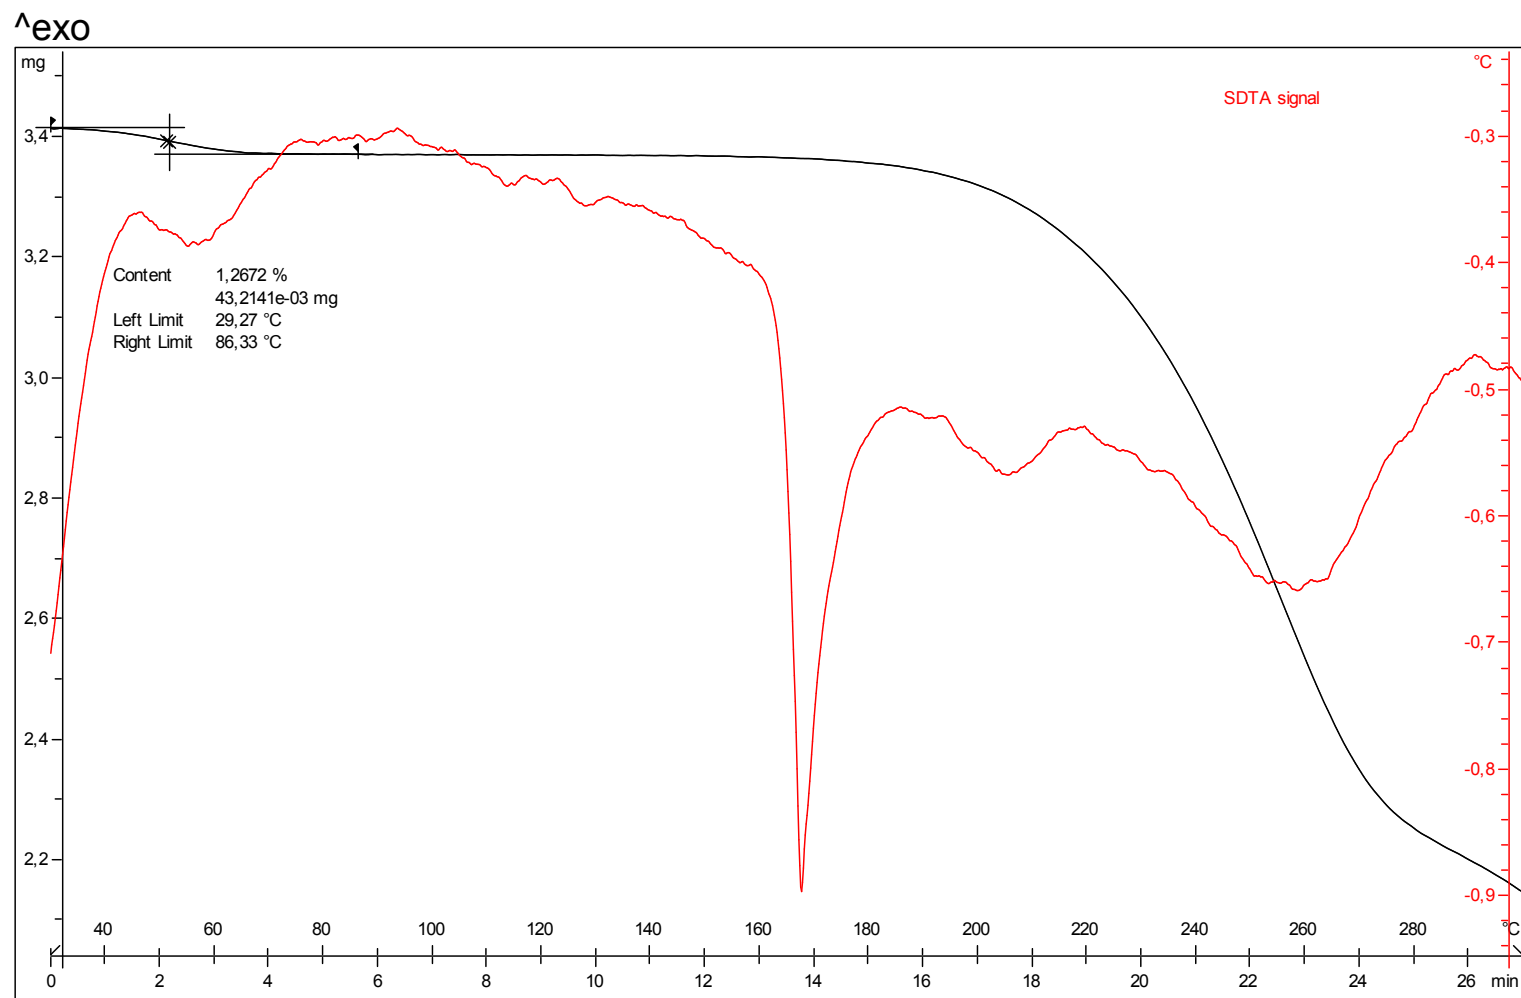

Figure S37: The XRPD of SIT-4-HBA-H<sub>2</sub>O II cocrystal has been indexed with the following proposed triclinic cell:  $a=43.1(1)$  Å,  $b=7.05(1)$  Å,  $c=8.37(2)$  Å,  $\alpha=107.4(1)$ ,  $\beta=108.8(2)^\circ$ ,  $\gamma=89.2(1)$ ,  $V=2290(9)$  Å<sup>3</sup> (Figures of Merit:  $M=17$ ,  $F=63$ ), with number of impurities equal to zero. A  $P-1$  space group is compatible with the cell and the cell volume is compatible with 1 molecule of CSS  $\beta$ -Sitosterol, 1 molecule of 4-HBA and  $\frac{1}{2}$  molecule of water ( $R_{wp}$ : 21.8;  $R_{exp}$ : 1.45)

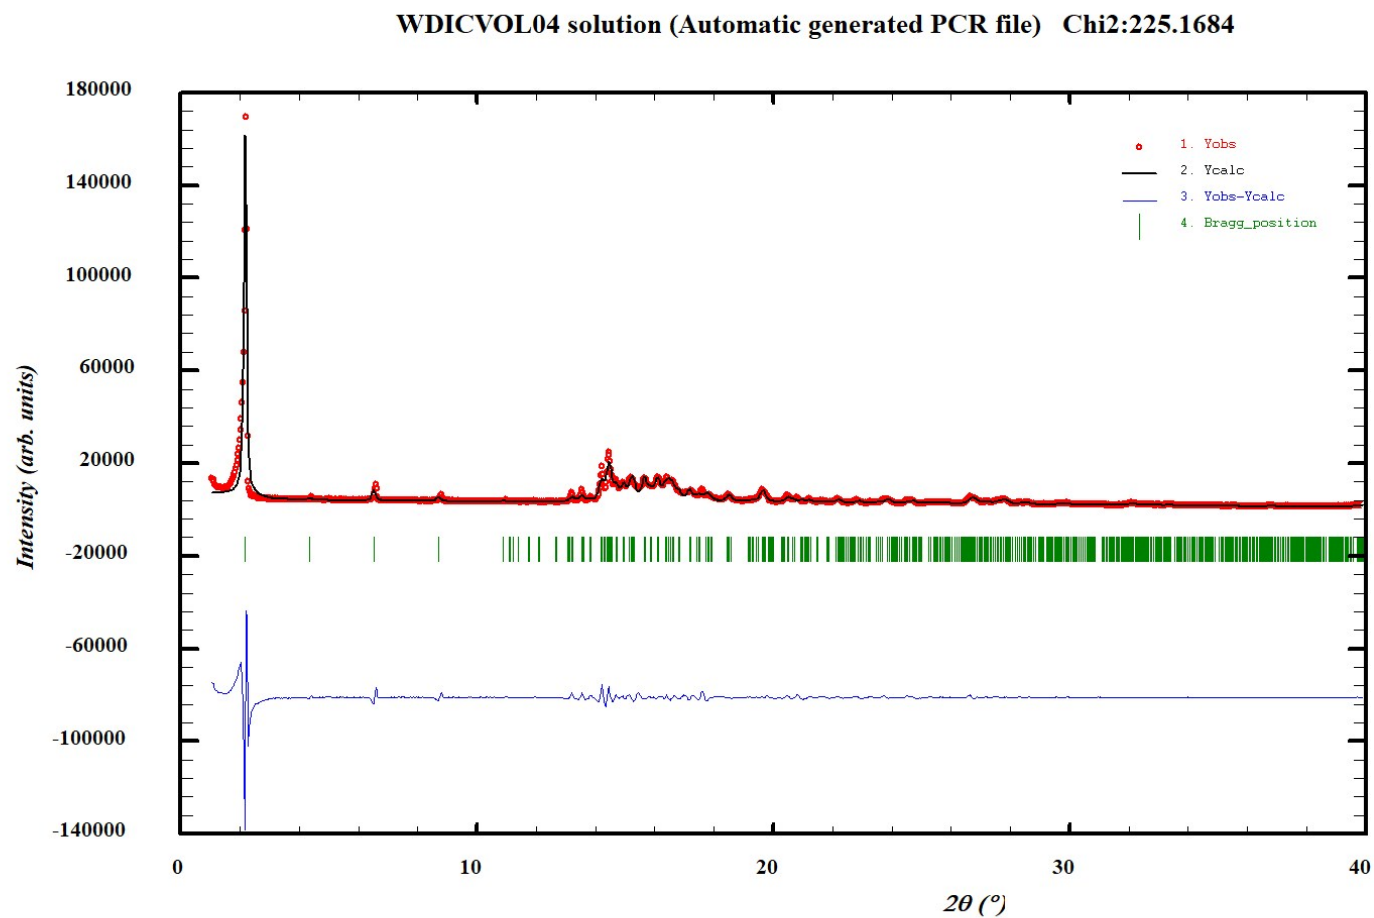



Figure S38: The XRPD of SIT-4-HBA-H<sub>2</sub>O II cocrystal has been indexed without the first peak at 2.2 2 $\theta$  with the following proposed triclinic cell:  $a=42.87(3)$  Å,  $b=7.083(5)$  Å,  $c=8.361(5)$  Å,  $\alpha=107.3(1)$ ,  $\beta=108.8(1)^\circ$ ,  $\gamma=89.06(3)$ ,  $V=2285(3)$  Å<sup>3</sup> (Figures of Merit:  $M=17$ ,  $F=63$ ), with number of impurities equal to zero. A  $P-1$  space group is compatible with the cell and the cell volume is compatible with 1 molecule of CSS  $\beta$ -Sitosterol, 1 molecule of 4-HBA and  $\frac{1}{2}$  molecule of water ( $R_{wp}$ : 7.21;  $R_{exp}$ : 1.59)

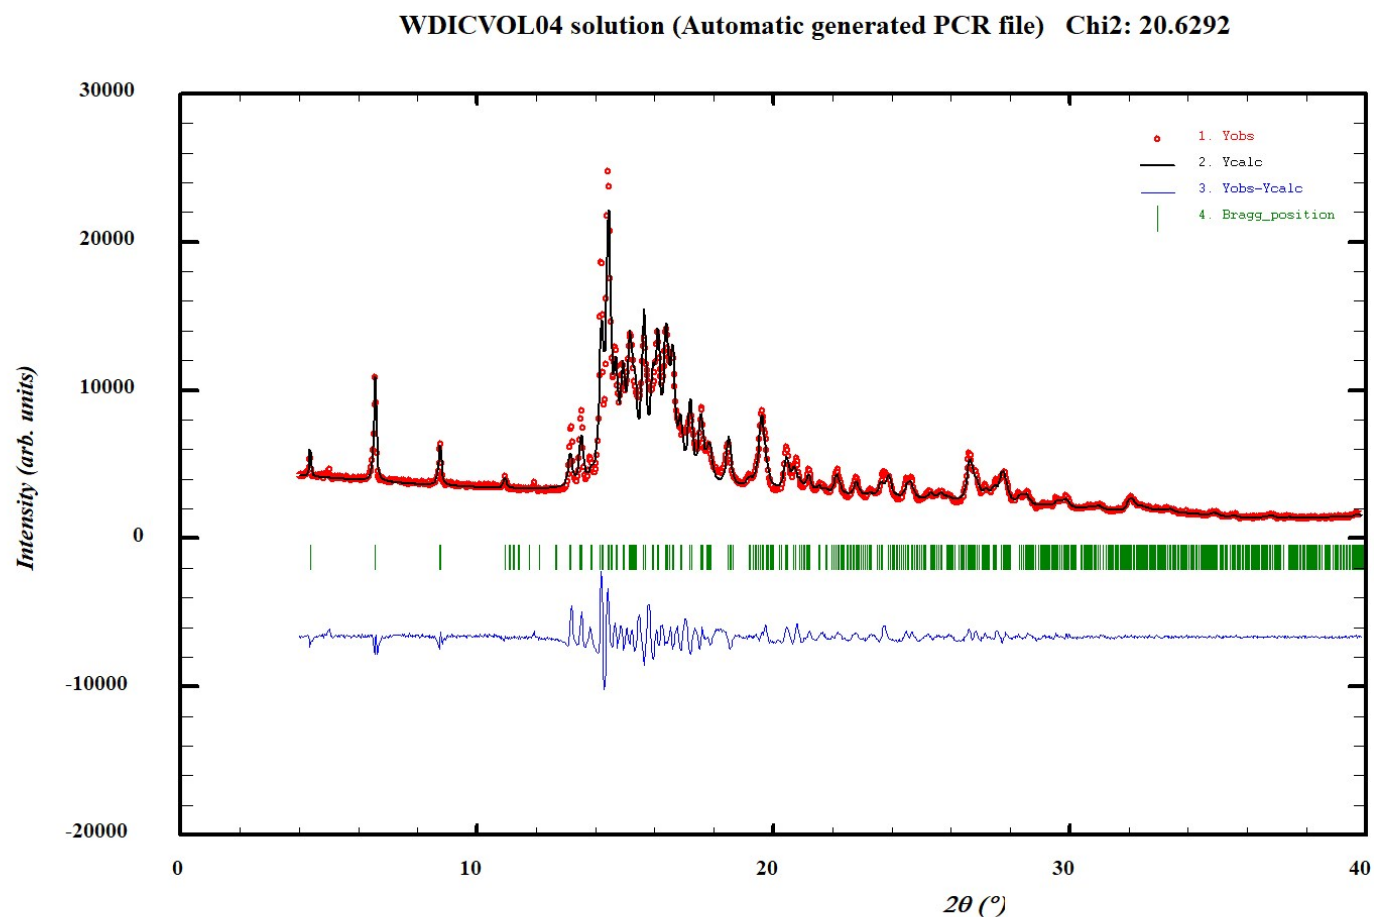

**Figure S39:  $^1\text{H}$ -NMR (dmso- $d_6$ /delay: 1/pulse: 45°/scans: 32) of Form SIT-4-HBA- $\text{H}_2\text{O}$  II**

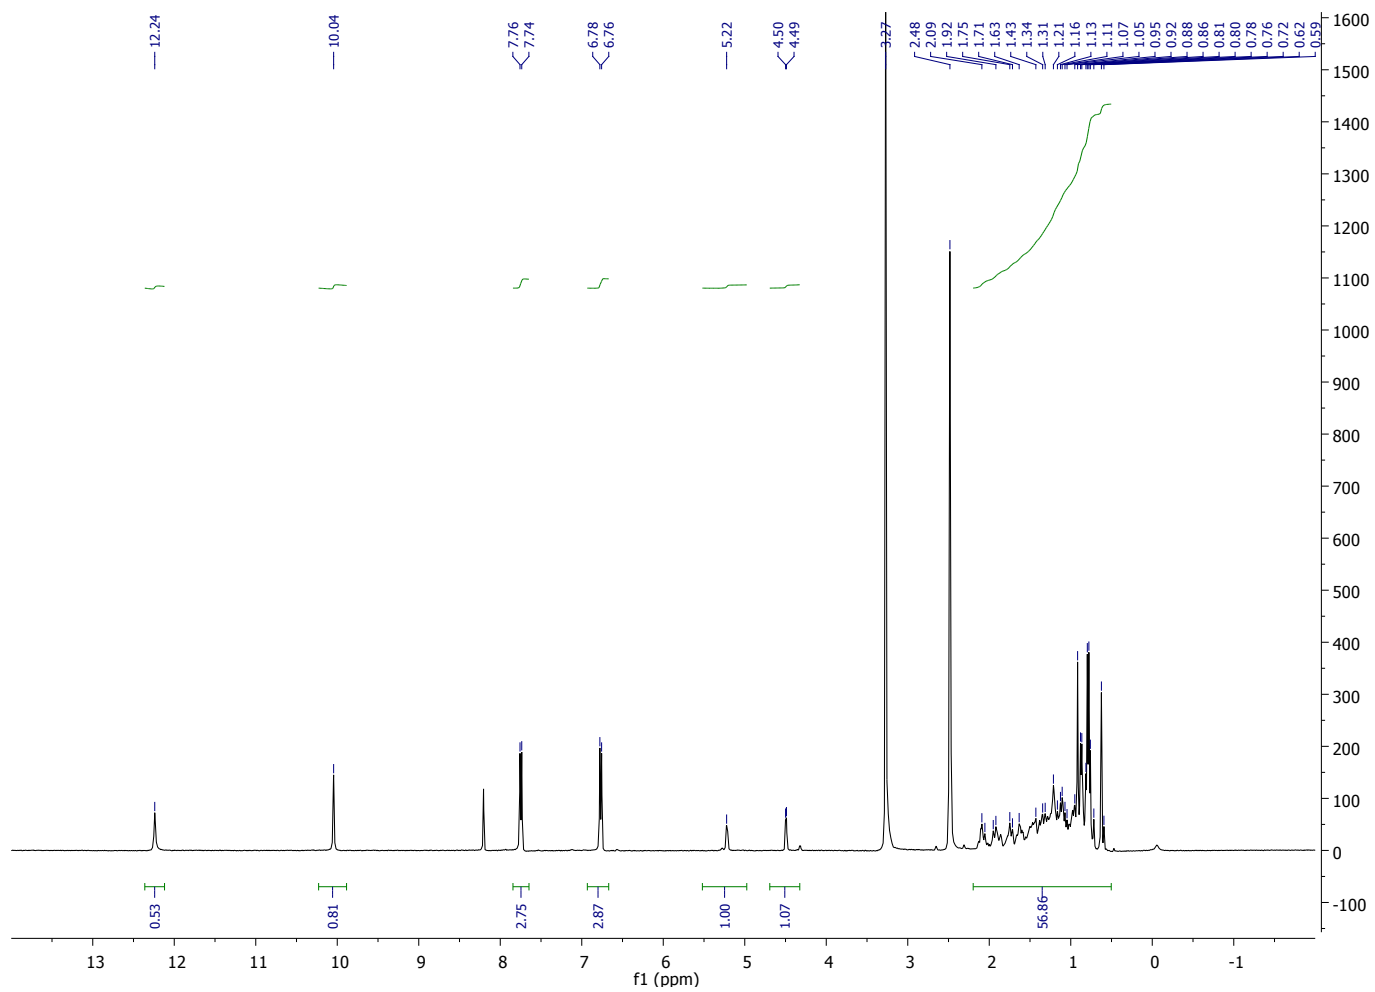

**Figure S40: DSC of Form SIT-3,4-DHBA-H<sub>2</sub>O**

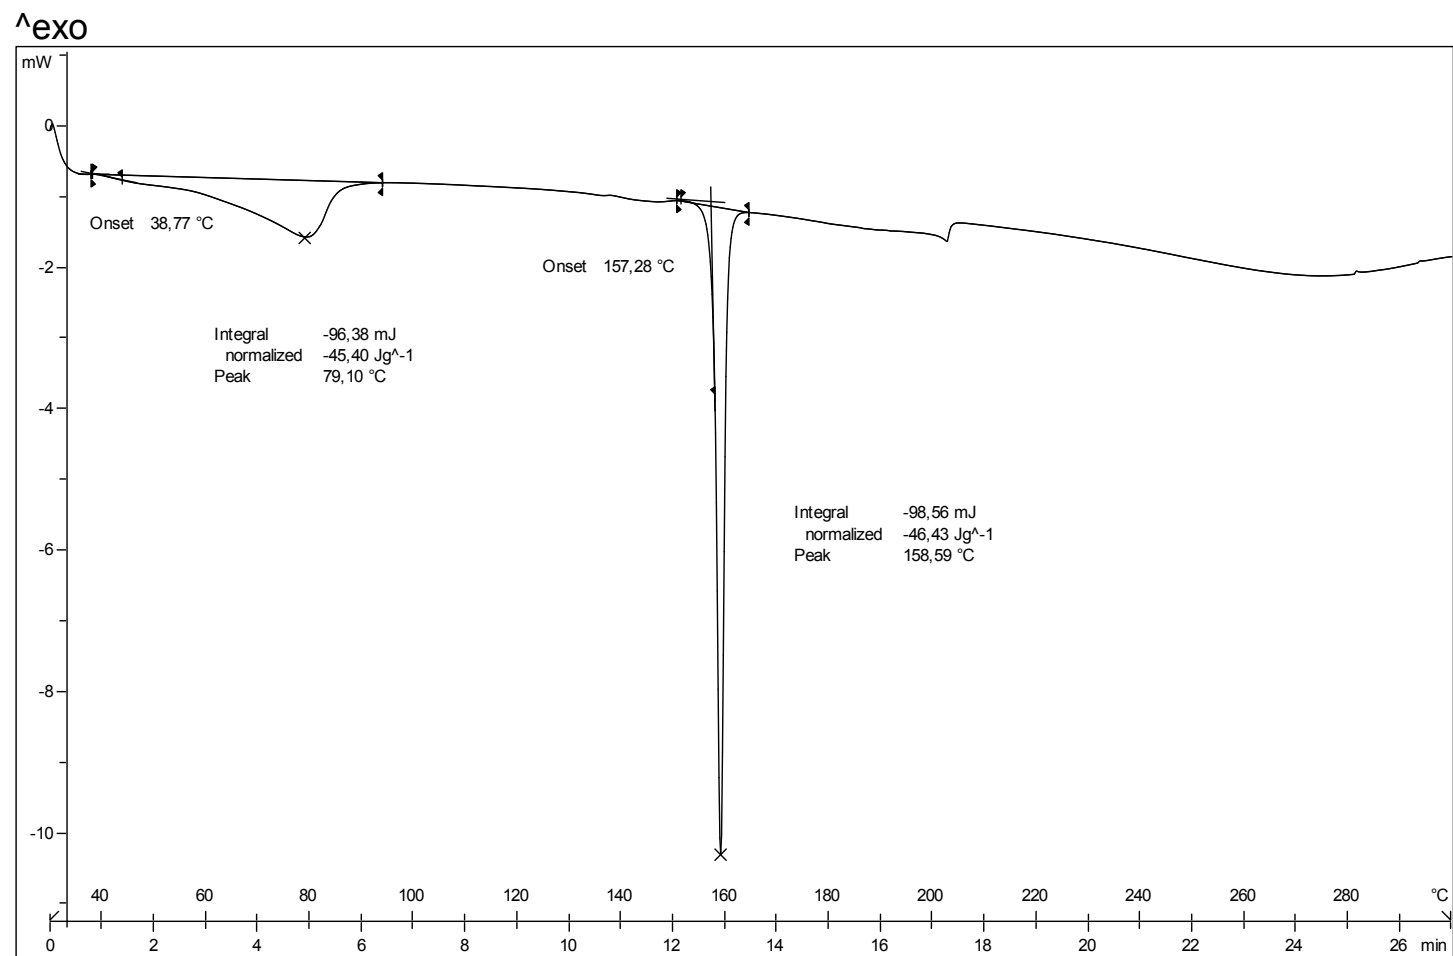

**Figure S41: TGA of Form SIT-3,4-DHBA-H<sub>2</sub>O:** a weight loss of 2.1% is detected from 29 °C to 116 °C which could be attributed to 1 molecule of water per 2 molecules of 3,4-DHBA and 1 molecule of CSS  $\beta$ -Sitosterol (theoretical weight loss of 2.4%)

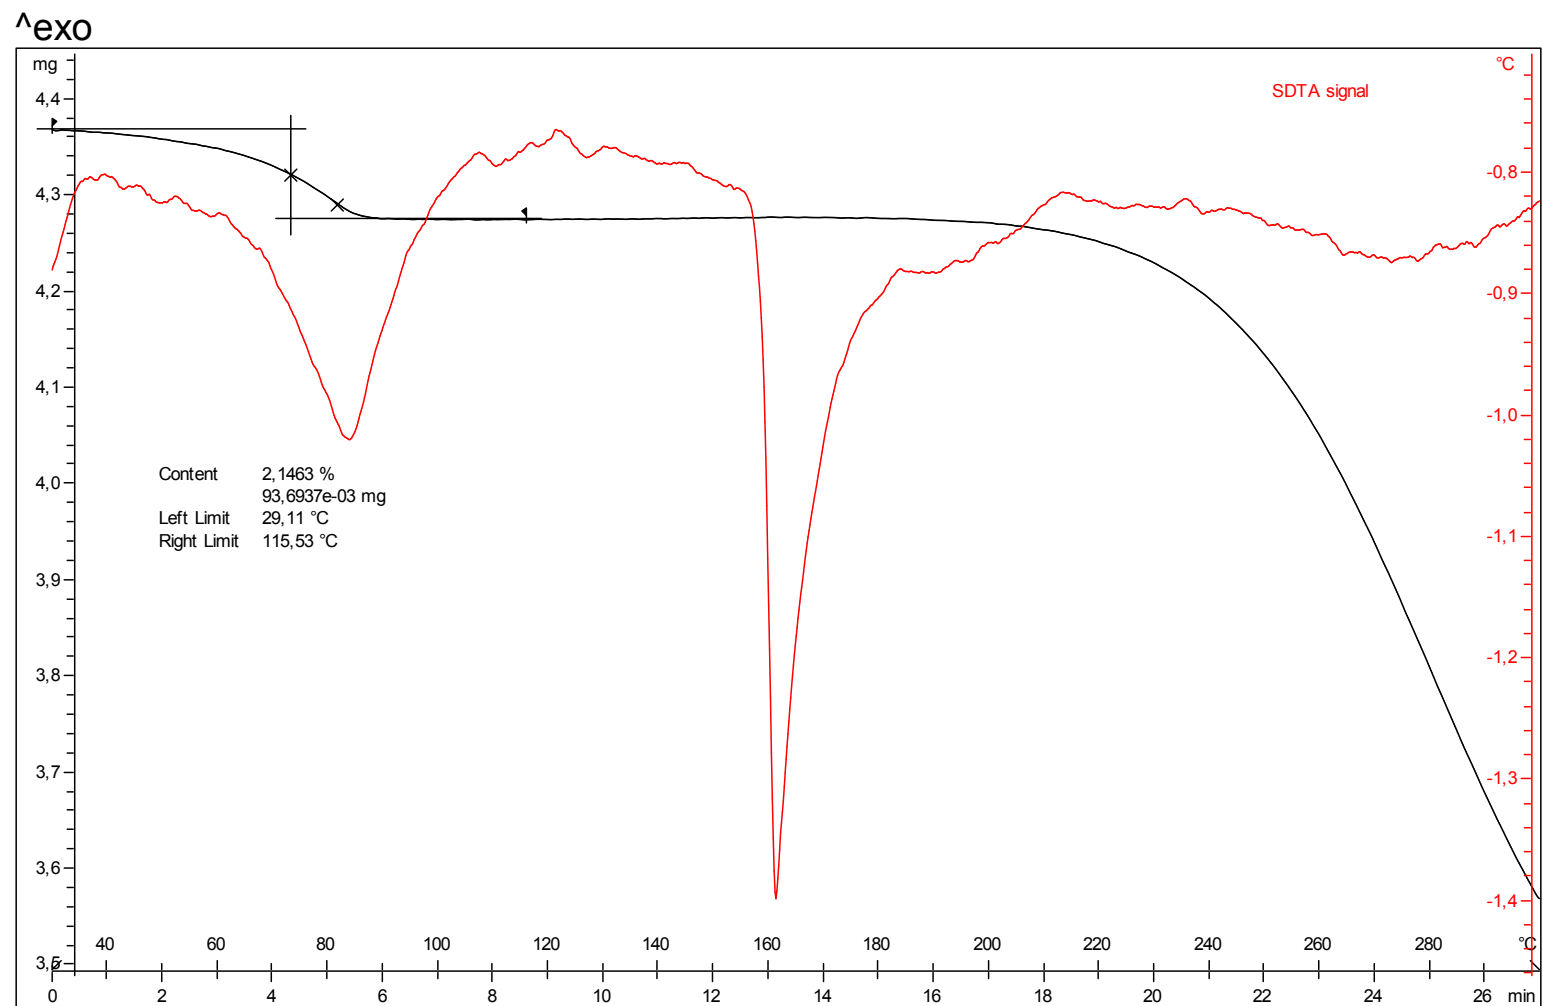

Figure S42: The XRPD of SIT-3,4-DHBA-H<sub>2</sub>O cocrystal has been indexed with the following proposed monoclinic cell:  $a=38.91(4)$  Å,  $b=14.017(8)$  Å,  $c=10.701(5)$  Å,  $\beta=92.41(9)^\circ$ ,  $V=5832(8)$  Å<sup>3</sup> (Figures of Merit:  $M=16$ ,  $F=72$ ), with number of impurities equal to zero. A  $P2_1$  space group is compatible with the cell and the cell volume is compatible with 1 molecule of CSS  $\beta$ -Sitosterol, 2 molecules of 3,4-DHBA and 1 molecule of water ( $R_{wp}$ : 22.6;  $R_{exp}$ : 1.46)

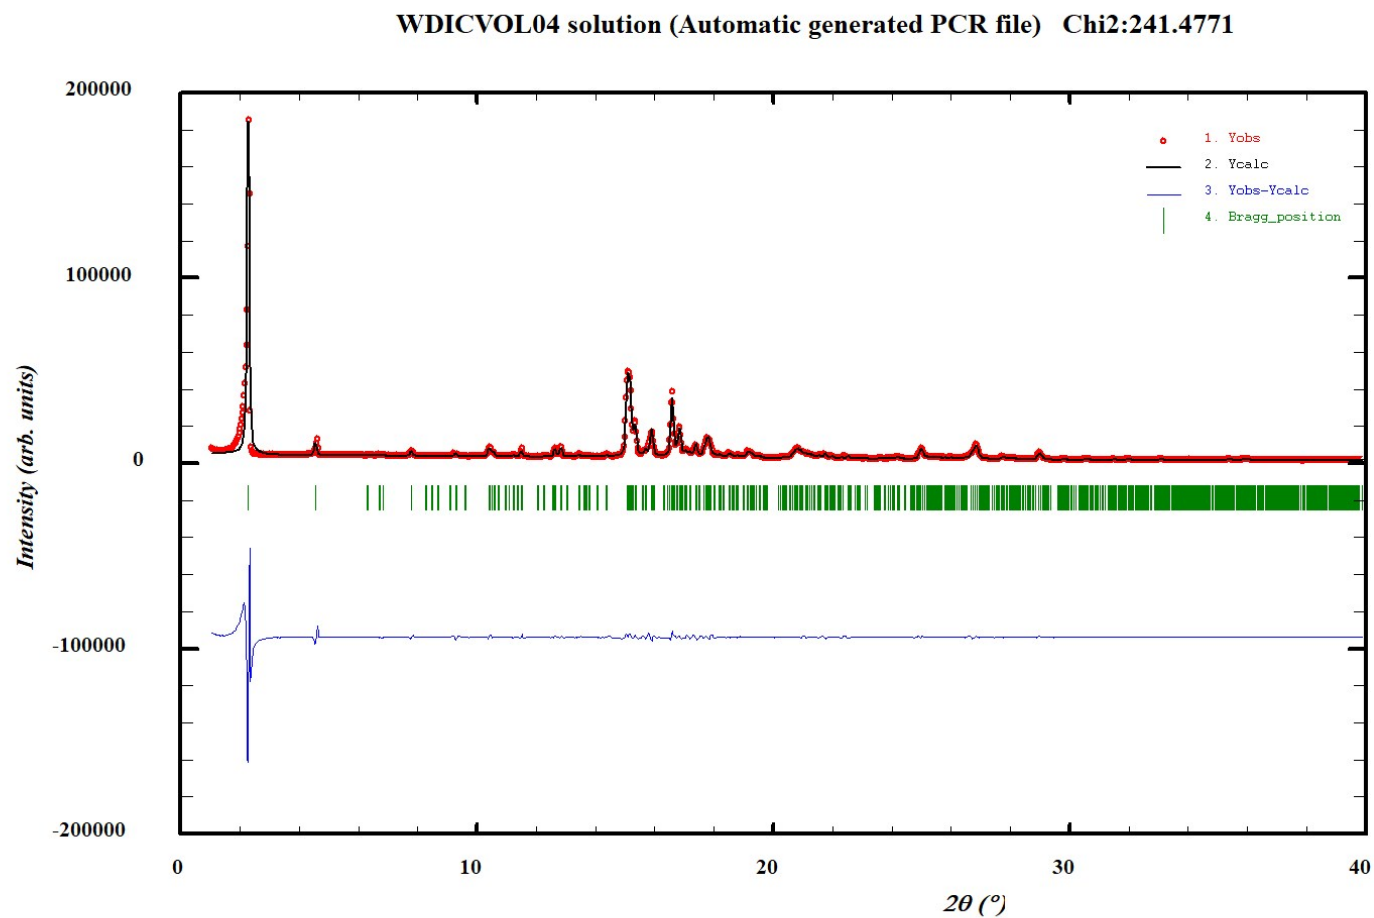

Figure S43:  $^1\text{H}$ -NMR (dms $o$ - $d_6$ /delay: 1/pulse: 45°/scans: 32) of Form SIT-3,4-DHBA- $\text{H}_2\text{O}$

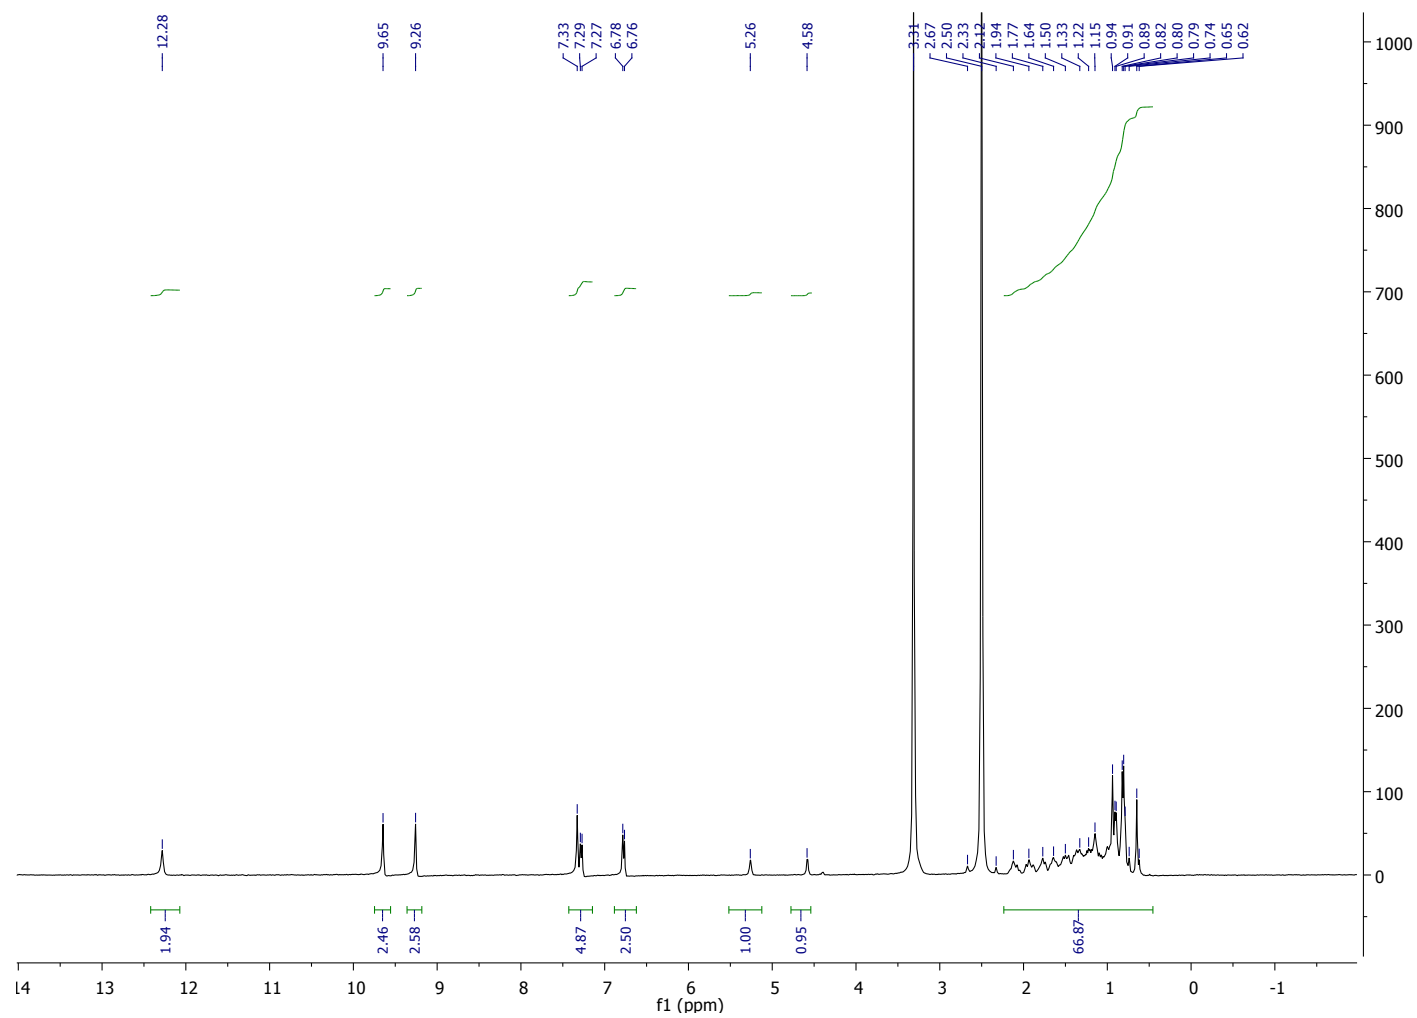

## 6. References

- [1] SADABS Bruker AXS; Madison, Wisconsin, USA, 2004; SAINT, Software Users Guide, Version 6.0; Bruker Analytical X-ray Systems: Madison, WI, 1999. Sheldrick, G. M. SADABS v2.03; Area-Detector Absorption Correction; University of Göttingen: Germany, 1999. Saint, Version 7.60A; Bruker AXS 2008; SADABS, V. 2008-1, 2008.
- [2] G. M. A, Sheldrick, *Acta Crystallogr., Sect. A*, 2008, **64**, 112–122.
